# Supplementary material for: Of Mice and Men: Divergence of Gene Expression Patterns in Kidney
Source: PLoS One. 2012 Oct 3;7(10):e46876. doi: 10.1371/journal.pone.0046876 (PMC3463552; doi:10.1371/journal.pone.0046876)
Supplement: Table S1 — mRNA SAGE tags detected in the human and mouse nephron. Values are normalized to10,000 tags in each library. gb, Genbank reference of the sequence. Genes are identified according to the HUGO nomenclature, including the symbol and the sequence definition. (XLS) [file pone.0046876.s003.xls]

## Sheet: Feuil1
Table S1. mRNA SAGE tags detected in the human and mouse nephron.
HUGO	Sequence definition	Hs.Glom	Hs.S1	Hs.S3	Hs.mTAL	Hs.cTAL	Hs.DCT	Hs.CCD	Hs.OMCD	Hs.gb	Mm.Glom	Mm.S1	Mm.S3	Mm.mTAL	Mm.cTAL	Mm.DCT	Mm.CCD	Mm.OMCD	Mm.gb
A2M	alpha-2-macroglobulin	8.26	0.92	0	0	0.21	0.17	0.19	0.15	NM_000014	0	0	0.4	0	0	0	0	0	NM_175628
AAAS	achalasia, adrenocortical insufficiency, alacrimia (Allgrove, triple-A)	0	0	0.44	0.21	0	0.35	0.38	0.3	NM_015665	0	0	0	0	0	0.1	0	0	NM_153416
AACS	acetoacetyl-CoA synthetase	0	0	0	0	0.21	0.17	0	0	NM_023928	0	1.19	3.32	0	0	0	0	0.14	NM_030210
AAMP	angio-associated, migratory cell protein	0	0	0.22	0.63	0.62	0.17	0.38	0.45	NM_001087	1.87	2.15	3.32	1.05	1.37	0.98	2.02	0.57	NM_146110
AARS	alanyl-tRNA synthetase	0.23	0.69	0.44	0.42	0.62	0.17	0.19	0.45	NM_001605	0	0	0	0	0	0	0	0	NM_146217
AARSD1	alanyl-tRNA synthetase domain containing 1	0	0	0	0	0	0.17	0	0	NM_025267	0.56	0.24	0	0.58	0.57	0	0.81	0	NM_144829
AASS	aminoadipate-semialdehyde synthase, nuclear gene encoding mitochondrial protein	0	0	0	0	0	0	0	0	NM_005763	0	0.48	0.53	0	0	0	0.13	0	NM_013930
ABCA1	ATP-binding cassette, sub-family A (ABC1), member 1	0	0	0	0	0	0	0	0	NM_005502	0	0	0.13	0.35	0.11	0.29	0.27	0	NM_013454
ABCA13	ATP-binding cassette, sub-family A (ABC1), member 13	0	0	0	0	0	0	0	0	NM_152701	0	0	0	0.81	0.23	0.49	0	0	NM_178259
ABCA2	ATP-binding cassette, sub-family A (ABC1), member 2	0.46	0	0.22	0.21	0.41	0	0	0.15	NM_001606	0	0	0	1.05	0.11	0.2	0.4	0.99	NM_007379
ABCA5	ATP-binding cassette, sub-family A (ABC1), member 5	0	0	0	0	0	0.17	0.19	0	NM_018672	0	0	0	0.12	0.11	0	0.27	0.14	NM_147219
ABCA7	ATP-binding cassette, sub-family A (ABC1), member 7	0	0	0	0	0	0	0	0	NM_019112	0	0.12	0	0	0.11	0.2	0.13	0.43	NM_013850
ABCB7	ATP-binding cassette, sub-family B (MDR/TAP), member 7, nuclear gene encoding mitochondrial protein	0.23	0.23	0.44	0	0	0.35	0.19	0	NM_004299	0	0	0	0	0	0	0	0	BC080769
ABCB8	ATP-binding cassette, sub-family B (MDR/TAP), member 8	0	0	0	0	0	0.17	0	0.15	NM_007188	0	0.48	0.4	0.23	0.46	0	0.13	0.57	NM_029020
ABCC3	ATP-binding cassette, sub-family C (CFTR/MRP), member 3	0	0	0.22	0	0.21	0	0	0.15	NM_003786	0	0	0	0	0	0	0.27	0.43	NM_029600
ABCD3	ATP-binding cassette, sub-family D (ALD), member 3	0	0.46	0.66	0.21	0.41	0	0.57	0.15	NM_002858	0	3.1	2.12	0.35	0.46	0.2	0	0.14	BC009119
ABCF1	ATP-binding cassette, sub-family F (GCN20), member 1	0	0	0	0.21	0	0	0	0	NM_001025091	1.31	0.84	0.8	0.81	1.03	0.59	0.94	1.13	NM_013854
ABCG2	ATP-binding cassette, sub-family G (WHITE), member 2	0	0	0	0	0	0	0	0	NM_0044827	1.12	1.07	0.93	0	0.11	0	0	0	NM_011920
ABHD1	abhydrolase domain containing 1	0.23	0	0	0	0	0	0	0	NM_032604	0	0.48	0.8	0.12	0.23	1.66	0.13	0.71	NM_021304
ABHD10	abhydrolase domain containing 10	0	0.23	1.53	0.63	0.62	0.35	0.19	0	NM_018394	0	0	0	0	0.11	0	0.27	0	AK051923
ABHD14B	abhydrolase domain containing 14b	0.46	0	0.87	0.42	0.21	0.17	0.57	0.3	NM_032750	0	0.24	1.59	0.47	0.91	0.69	0.81	0.43	NM_029631
ABHD3	abhydrolase domain containing 3	0.23	0	0	0	0.41	0.35	0	0	NM_138340	0.56	0	0.27	0.12	0	0.2	1.75	0.99	NM_134130
ABHD4	abhydrolase domain containing 4	0	0.23	0	0	1.03	0	0.19	0.15	NM_022060	0.93	0	0	0.47	0.11	0.2	0.13	0	NM_134076
ABHD5	abhydrolase domain containing 5	0	0	0	0	0	0.17	0	0	NM_016006	0	0.12	0.13	0	0	0	0.27	0.28	NM_026179
ABHD6	abhydrolase domain containing 6	0.69	0.23	0.22	0	0	0.17	0.19	0.6	NM_020676	0	0	0.13	0.47	0.23	0	0.13	0.28	NM_025341
ABHD8	abhydrolase domain containing 8	0	0	0.22	0.42	0	0	0.19	0	NM_024527	0.37	0	0.13	0.23	0.23	0	0.27	0.14	NM_022419
ABI2	abl interactor 2	0.23	0.23	0	0.42	0	0	0.57	0	NM_005759	0	0.24	0	0.23	0.23	0.29	0.27	0.43	NM_198127
ABL1	v-abl Abelson murine leukemia oncogene 1	0	0	0.22	0	0.21	0.35	0	0.15	NM_005157	1.5	0	0.27	0.35	0.11	0	0.27	0.71	NM_009594
ABL2	v-abl Abelson murine leukemia viral oncogene 2 (arg, Abelson-related gene)	0	0	0	0	0	0	0	0	NM_005158	0.56	0	0	0.12	0	0.2	0.4	0.28	NM_009595
ABLIM1	Actin-binding LIM protein 1	0.23	0.23	0	1.47	0.62	0.35	0.19	0.15	NM_002313	0	0	0.53	0.12	0	0.1	0.13	0.57	AK122196
ABP1	amiloride binding protein 1 (amine oxidase (copper-containing))	0.23	3.45	1.53	0.63	0.83	0.35	1.14	3.16	NM_001091	0	0	0	0.23	0.23	0	0	0	NM_029638
ABTB1	ankyrin repeat and BTB (POZ) domain containing 1	0.23	0.23	0	0	0.21	0.17	0	0.3	NM_172027	0	0	0	0.12	0.11	0	0.27	0.14	NM_030251
ABTB2	ankyrin repeat and BTB (POZ) domain containing 2	0	0	0	0	0	0	0.38	0	NM_145804	0	0	0	0	0	0	0	0.14	NM_178890
ACAA2	acetyl-Coenzyme A acyltransferase 2 (mitochondrial 3-oxoacyl-Coenzyme A thiolase)	0.23	3.68	6.34	2.73	1.45	2.25	1.9	1.21	NM_006111	1.87	1.19	0	3.72	2.85	0.98	5.78	5.25	NM_177470
ACAD10	acyl-Coenzyme A dehydrogenase family, member 10	0	0	0.44	0	0.62	0.17	0	0	NM_025247	0	1.07	2.12	0.7	0.68	0.98	0.13	0.43	NM_028037
ACAD11	acyl-Coenzyme A dehydrogenase family, member 11	0	0.23	0.22	0	0	0.17	0	0	NM_032169	0.19	0.6	0.66	0.23	0.91	0.29	0.4	0.43	NM_175324
ACAD9	acyl-Coenzyme A dehydrogenase family, member 9	0	0.23	0	0.21	0	0.35	0	0.3	NM_014049	0	0.36	0.53	0	0.11	0.1	0	0	NM_172678
ACADL	acyl-Coenzyme A dehydrogenase, long chain, nuclear gene encoding mitochondrial protein	0.46	0	0	0	0	0	0	0.3	NM_001608	0.93	2.74	5.71	2.91	3.76	0.88	2.15	0.85	NM_007381
ACADM	acyl-Coenzyme A dehydrogenase, medium chain	0	0.46	1.31	0.21	0	0.87	0.38	0.15	NM_000016	0.93	3.94	15.4	1.63	2.51	0.88	1.21	0.28	NM_007382
ACADS	acyl-Coenzyme A dehydrogenase, short chain	0	0.23	0.44	0.42	0	0.52	0.19	0.15	NM_000017	0	1.43	1.33	0.7	1.37	6.27	1.75	0.28	NM_007383
ACADVL	acyl-Coenzyme A dehydrogenase, very long chain	0.69	4.6	5.03	4.42	6.81	6.58	4.75	6.48	NM_000018	1.87	1.55	3.32	3.26	5.58	2.94	2.15	1.56	NM_017366
ACAT1	acetyl-Coenzyme A acetyltransferase 1 (acetoacetyl Coenzyme A thiolase), nuclear gene encoding mitochondrial protein	0	2.07	1.31	0.21	0.41	0.87	0.57	0.45	NM_000019	0	0.24	0	0	0.11	0.2	0	0	NM_144784
ACBD3	acyl-Coenzyme A binding domain containing 3	0.69	0.23	0.22	0	0.41	0.35	0.38	0	NM_022735	0	0.12	0	0	0	0	0	0	NM_133225
ACBD5	acyl-Coenzyme A binding domain containing 5	0	0	0	0.21	0	0	0	0	NM_145698	0	0.95	0.13	0.23	0.91	0.49	0.67	0.57	NM_028793
ACBD6	acyl-Coenzyme A binding domain containing 6	0.46	0	0.44	0	0.21	0	0	0	NM_032360	0.75	0.12	0.13	0.12	0.23	0.29	0	0.14	NM_028250
ACE2	angiotensin I converting enzyme (peptidyl-dipeptidase A) 2	0	0.92	1.53	0	0	0	0	0	NM_021804	0	0.48	1.46	0.12	0	0	0.13	0	NM_027286
ACIN1	apoptotic chromatin condensation inducer 1	0.46	0	0	0	0.21	0	0.19	0.3	NM_014977	0.37	0.24	0.13	0.7	0.57	0.49	1.46	0.43	NM_0195567
ACLY	ATP citrate lyase	0.23	0.23	0.66	0.21	0	0	0	0	NM_001096	0	0	0	0	0.11	0.49	0.4	0	NM_134037
ACMSD	aminocarboxymuconate semialdehyde decarboxylase	0	0.23	0.44	0	0	0	0	0	NM_138326	1.12	2.03	1.33	1.4	0.23	0.2	0.94	1.99	NM_001033041
ACN9	ACN9 homolog (S. cerevisiae)	0	0.23	0	0.21	0	0	0.19	0.3	NM_020186	0.93	0	0	0	0.11	0.39	0	0	NM_001077713
ACO1	aconitase 1, soluble	0	1.38	0.66	0	0	0	0	0	NM_002197	0	0	0	0	0	0	0	0	NM_007386
ACO2	aconitase 2, mitochondrial	0.46	3.91	4.37	1.26	2.06	1.56	2.09	1.51	NM_001098	0	1.55	0.8	0.58	0.57	0.2	0	0.28	NM_080633
ACOT12	acyl-CoA thioesterase 12	0	0	0	0	0	0	0	0	NM_130767	0	1.43	1.33	0	0.11	0	0	0	NM_028790
ACOT4	acyl-CoA thioesterase 4	0.23	0.92	0	0.21	0	0	0	0	NM_152331	0	0	0	0	0	0	0	0	NM_134247
ACOT8	acyl-CoA thioesterase 8	0	0.46	0.22	0	0.41	0.35	0	0	NM_005469	0.19	0.6	0	0.23	0.46	0.29	0.81	0.28	NM_133240
ACOX1	acyl-Coenzyme A oxidase 1, palmitoyl	0	0.69	0.44	0	0	0	0	0	NM_004035	0.56	9.19	6.51	0.93	1.25	0.2	1.34	0.85	NM_015729
ACOX2	acyl-Coenzyme A oxidase 2, branched chain	0.23	0.92	1.09	0	0	0.17	0	0	NM_003500	0	0.24	1.73	0	0	0	0	0	NM_053115
ACP2	acid phosphatase 2, lysosomal	0	0.23	0.44	0.21	0	0	0	0.15	NM_001610	0	0	0	0.12	0	0	0.13	0	NM_007387
ACP5	acid phosphatase 5, tartrate resistant	0.23	2.53	0.66	0	0	0.17	0	0	NM_001611	0	0.72	1.33	0.12	0.11	0	0	0	NM_007388
ACP6	acid phosphatase 6, lysophosphatidic	2.75	1.84	2.19	1.89	5.57	2.08	1.33	0.6	NM_016361	0	0	0	0	0.11	0	0	0	NM_019800
ACSL1	acyl-CoA synthetase long-chain family member 1	0	0.46	0.66	1.26	0.41	0.52	0	0.15	NM_001995	0	0.12	0.27	1.28	1.03	0.78	0	0.14	NM_007981
ACSL5	acyl-CoA synthetase long-chain family member 5	0	0	0	0	0	0	0	0.15	NM_016234	0	0	0.27	0.93	0.8	0.69	1.21	1.13	NM_027976
ACSL6	Acyl-CoA synthetase long-chain family member 6	0.23	0	0	0.21	0.41	0	0.38	0	AB020644	0	0.36	1.06	0	0	0	0	0	NM_054094
ACSM3	acyl-CoA synthetase medium-chain family member 3, transcript variant 1	0	0.92	0.44	0.21	0	0.52	0.38	0.15	NM_005622	0.75	0.84	7.7	0	0.11	0.1	0	0	NM_016870
ACTA2	actin, alpha 2, smooth muscle, aorta	0.69	0.69	0.22	0.63	0	0.87	0.19	0.15	NM_001613	1.31	0	0	0	0	0	0	0	NM_007392
ACTG1	actin, gamma, cytoplasmic 1	8.95	4.37	10.06	11.99	6.19	15.23	23.18	49.87	NM_001614	8.41	7.75	2.66	17.21	11.17	3.62	17.61	22.83	NM_009609
ACTL6A	actin-like 6A	0	0	0	0.21	0	0	0	0	NM_004301	0.19	0.12	0	0.12	0.11	0.1	0.4	0.14	NM_019673
ACTN4	actinin alpha 4	4.36	0.23	0.44	0.42	1.03	0.35	0.76	1.36	NM_004924	3.55	0.36	0.66	1.16	0.57	0.29	0.27	2.55	NM_021895
ACTR10	ARP10 actin-related protein 10 homolog (S. cerevisiae)	0	0.23	0	0	0	0	0	0.3	NM_018477	0	0.24	0.66	0.12	0	0.1	0.13	0	NM_019785
ACTR1B	ARP1 actin-related protein 1 homolog B, centractin beta (yeast)	0.23	0	0.22	0	0.21	0.35	0.19	0	NM_005735	0.19	0.72	0.8	0.12	0	0	0.13	0	NM_146107
ACTR1B	ARP1 actin-related protein 1 homolog B	0.23	0	0.22	0	0.21	0.35	0.19	0	NM_005735	0	0.12	0.13	0.58	1.03	0.29	0.4	0.57	AK078508
ACTR2	ARP2 actin-related protein 2 homolog (yeast)	0	0	0	0.84	0	0.35	0.38	0.3	NM_001005386	0.37	0.6	0.53	0.35	0.57	0.2	0	0.14	NM_146243
ACTR3	ARP3 actin-related protein 3 homolog (yeast)	0.46	0	0.44	0	0	0.35	0.38	0.45	NM_005721	0	0.48	0.4	0	0.11	0.1	0	0	NM_023735
ACTR8	ARP8 actin-related protein 8 homolog (S. cerevisiae)	0	0	0	0	0	0	0	0	NM_022899	0.19	0	0	0.12	0.46	0.69	1.08	0.14	NM_027493
ACVR1	activin A receptor, type I	0.69	0	0.22	0.21	0.21	0.35	0	0.15	NM_001105	0	0.12	0	0	0	0	0	0	NM_007394
ACVR1B	activin A receptor, type IB, transcript variant 1	0.69	0.46	1.31	0.42	0.41	0.17	0.19	0.3	NM_004302	0	0.24	0.13	0.35	0	0.78	0.27	0.57	AK154578
ACY1	aminoacylase 1	0.23	4.37	8.75	0.21	0.21	0.52	0.38	0.45	NM_000666	3.36	16.1	115.11	0.81	1.37	0.29	1.75	0.71	NM_025371
ADAL	adenosine deaminase-like	0	0	0	0	0.21	0	0	0	NM_001012969	0	0.36	0.27	0.35	0.23	0	0.13	0.28	NM_029475
ADAM10	a disintegrin and metallopeptidase domain 10	0	0	0	0	0	0	0	0	NM_001110	0.19	0.48	0.13	0	0.23	0	0.4	0.43	NM_007399
ADAM17	ADAM metallopeptidase domain 17 (tumor necrosis factor, alpha, converting enzyme)	0.46	0	0	0	0	0	0	0	NM_003183	0	0	0	0	0.11	0.1	0	0	NM_009615
ADAM9	a disintegrin and metallopeptidase domain 9 (meltrin gamma)	0.23	0.46	0	0	1.03	0	0.19	0	NM_003816	0.37	0.12	0.66	0.47	0.46	1.76	0.81	0.57	NM_007404
ADAMTS1	ADAM metallopeptidase with thrombospondin type 1 motif, 1	0.46	0	0.22	0.21	0.62	0	0.38	0.6	NM_006988	0.75	0.12	0.27	0	0	0	0.4	0	NM_009621
ADAR	adenosine deaminase, RNA-specific, transcript variant 1	0	0	0.44	0.42	0.21	0.52	0.19	0.45	NM_001111	0	0	0	0	0.11	0	0	0.43	NM_019655
ADCK1	aarF domain containing kinase 1	0.23	0	0	0	0	0	0	0	NM_020421	0	0	0	0.23	0	0.1	0.27	0.14	NM_028105
ADCK4	aarF domain containing kinase 4	0	0.69	0.22	0.21	0.21	0.17	0.19	0	NM_024876	0	0	0.8	0.23	0.46	0.1	0	0.28	NM_133770
ADCK5	aarF domain containing kinase 5	0	0	0	0.21	0.21	0	0	0	NM_174922	0.93	0.12	0	0.12	0.11	2.45	0.54	0	NM_172960
ADCY3	adenylate cyclase 3	0.46	0	0	0	0.21	0	0	0	NM_004036	0	0	0	0	0	0	0	0	NM_138305
ADCY6	adenylate cyclase 6	0	0	0	0.42	0.21	0.17	0.38	0.45	NM_015270	2.24	0	0	1.16	1.6	2.94	1.88	1.56	NM_007405
ADCY9	adenylate cyclase 9	0	0.23	0	0	0	0	0.38	0	NM_001116	1.12	0.24	0.27	0.35	0.34	0.2	0.27	0.14	NM_001024458
ADD3	adducin 3 (gamma)	1.84	0.69	0.22	0	0.62	0.35	0	0.3	NM_016824	0	0	0	0.12	0	0.1	0.27	0	NM_013758
ADFP	adipose differentiation-related protein	0.69	3.45	1.31	0	0	0.35	0.38	0.45	NM_001122	0	0.12	0.53	0.23	0.11	0.1	1.21	0.14	NM_007408
ADH5	alcohol dehydrogenase 5 (class III), chi polypeptide	0.23	0	0	0	0.21	0.52	0.19	0.3	NM_000671	0	0	0	0	0	0	0	0	NM_007410
ADIPOR1	adiponectin receptor 1	0.69	0	0.44	0.21	0.62	0.52	0.76	0.3	NM_015999	4.3	0	0.13	0.58	0.23	0.59	1.08	1.84	NM_028320
ADIPOR2	adiponectin receptor 2	0.23	0	0	0.21	0	0.17	0.38	0.15	NM_024551	0	0.95	1.59	0.81	0.34	0.29	0.27	0.57	NM_197985
ADM	adrenomedullin	0.23	0	0.44	0.21	1.65	1.04	0.76	0.45	NM_001124	0.37	0.36	0.13	0.12	0	0.1	0	0	NM_009627
ADNP	activity-dependent neuroprotective protein	0.69	0	0.44	0	0.21	0.17	0	0	NM_015339	0.75	0.12	0.27	0	0.34	0	0.54	0.71	NM_009628
ADPRH	ADP-ribosylarginine hydrolase	0	0	0	0	0	0	0	0	NM_001125	0	0	0	0.12	0.11	0.1	0.54	0.14	NM_007414
ADPRHL2	ADP-ribosylhydrolase like 2	0.23	0.46	0.22	0	0	0	0.38	0.15	NM_017825	0.37	0.36	0.27	0	0.11	0.29	0	0.43	AK150202
ADRA2B	adrenergic receptor, alpha 2b	0	0.23	0	0	0	0	0	0	NM_000682	0	0.48	0.8	0	0	0	0	0	NM_009633
ADRBK1	adrenergic receptor kinase, beta 1	0	0	0.22	0	0	0	0.19	0.15	NM_001619	0.56	0	0.13	0	0	0	0.13	0.85	NM_130863
ADRM1	adhesion regulating molecule 1	0.23	0.23	0.44	0	0	0	0	0.45	NM_007002	0.56	0.24	0.53	0.47	0.46	0.1	0.54	0.71	NM_019822
ADSS	adenylosuccinate synthase	0.92	0	0.66	0.21	0.41	0.35	0.19	0.6	NM_001126	0.19	1.07	0.8	0.47	0.8	0.2	0.13	0.28	NM_007422
ADSSL1	adenylosuccinate synthetase like 1	0	0	0.22	0	0	0	0	0	NM_199165	0	0	0	0.58	1.25	2.15	0	0	NM_007421
AES	amino-terminal enhancer of split	2.29	0.23	0	0.21	0.41	0.69	0.57	1.21	NM_198969	2.43	2.86	1.46	7.79	6.38	5.29	5.38	15.31	NM_010347
AFAP1L1	actin filament associated protein 1-like 1	0.23	0	0	0	0	0	0	0	NM_152406	0.37	0.12	0.8	0	0	0.1	0	0	NM_178928
AFF1	AF4/FMR2 family, member 1	0.69	1.61	0.44	0	1.03	0.69	1.52	1.36	NM_005935	0	0	0	0.12	0.23	0.78	1.21	0	NM_133919
AFF4	AF4/FMR2 family, member 4	0.46	0	0	0	0.21	0	0	0	NM_014423	0	0	0	0	0	0	0.13	0	NM_033565
AFG3L2	AFG3 ATPase family gene 3-like 2 (yeast), nuclear gene encoding mitochondrial protein	0	0.69	0.87	0.42	0.83	0.17	0.57	0.3	NM_006796	0.56	0.6	0.27	0.7	0.68	0.49	1.21	0.14	NM_027130
AFM	afamin	0	0	0.22	0.2	0	0	0	0	NM_001133	1.12	1.31	0.27	0.81	2.16	3.13	0.4	0	NM_145146
AFTPH	Aftiphilin	0	0.46	0.22	0	0.41	0.17	0	0	AL833962	0	0.12	0.13	0.23	0.23	0.2	0.4	0.43	NM_181411
AFTPH	Aftiphilin	0.23	0.23	0.44	0	0	0	0.19	0	NM_203437	0.19	0	0.53	0.23	0.11	0.59	0.27	0	AK136815
AGGF1	angiogenic factor with G patch and FHA domains 1	0	0	0	0	0.21	0	0	0	NM_018046	1.31	0	0.13	0.12	0.11	0.39	0.67	0.28	NM_025630
AGPAT1	1-acylglycerol-3-phosphate O-acyltransferase 1 (lysophosphatidic acid acyltransferase, alpha)	0	0	0.22	0.63	0.21	0.17	0.19	0.15	NM_006411	0.75	0	0.13	0.12	0.11	0.1	0.13	0.85	NM_018862
AGPAT2	1-acylglycerol-3-phosphate O-acyltransferase 2 (lysophosphatidic acid acyltransferase, beta), transcript variant 1	0	0	0	0.42	0.41	0.35	0.19	0.45	NM_006412	0	0	0	0	0	0	0	0	NM_026212
AGPAT3	1-acylglycerol-3-phosphate O-acyltransferase 3	0.23	0.46	0.22	0	0	0.17	0.19	0.15	NM_020132	0	0.12	0.4	0.23	0.23	0	0.13	0	NM_053014
AGPAT4	1-acylglycerol-3-phosphate O-acyltransferase 4 (lysophosphatidic acid acyltransferase, delta)	0	0	0	0	0	0	0	0	NM_020133	0	0	0	0.12	0	0	0.27	0	NM_026644
AGPAT6	1-acylglycerol-3-phosphate O-acyltransferase 6 (lysophosphatidic acid acyltransferase, zeta)	0.23	0	0.22	0.21	0	0.17	0	0	NM_178819	0	0	0	0	0.11	0	0.27	0	NM_018743
AGPAT7	1-acylglycerol-3-phosphate O-acyltransferase 7 (lysophosphatidic acid acyltransferase, eta)	0.46	0	0	0	0.21	0.17	0	0.15	NM_153613	0	0	0	0	0	0.1	0	0	NM_207206
AGRN	agrin	1.15	0	0.44	0.63	0.62	0.35	0.38	0.75	NM_198576	4.86	0.12	1.06	1.63	2.16	2.06	4.44	2.69	NM_021604
AGT	angiotensinogen (serpin peptidase inhibitor, clade A, member 8)	0	0.69	0.87	0	0	0	0	0	NM_000029	0	0.24	0	0	0	0	0	0	NM_007428
AGTPBP1	ATP/GTP binding protein 1, transcript variant 1	0	0	0	0	0	0	0	0	NM_015239	0	0	0	0.12	0	0	0.13	0.43	NM_023328
AGTRL1	angiotensin II receptor-like 1	1.61	0	0	0	0	0	0	0	NM_005161	0	0	0	0	0	0	0	0.14	NM_011784
AGXT	alanine-glyoxylate aminotransferase	0	0.92	1.75	0	0	0	0	0	NM_000030	0	0	0	0	0	0	0	0	NM_016702
AGXT2	alanine-glyoxylate aminotransferase 2, nuclear gene encoding mitochondrial protein	0	0.69	0.87	0	0	0	0	0	NM_031900	0	0.24	0	0	0.11	0.1	0	0	NM_001031851
AGXT2L2	alanine-glyoxylate aminotransferase 2-like 2	0.23	0.46	0	0	0.21	0	0	0	NM_153373	0	0	0.13	0	0	0.1	0.13	0	NM_028398
AHCY	S-adenosylhomocysteine hydrolase	0.23	0	2.41	0	0.21	0	0	0.15	NM_000687	0.75	1.67	4.38	0.35	0.11	0.2	0.54	0.43	BC108367
AHNAK	AHNAK nucleoprotein (desmoyokin), transcript variant 1.	2.52	0	0.44	0.63	0.41	0.17	0.19	0.9	NM_001620	4.86	0	0	0.7	0.57	0.2	1.88	4.25	NM_009643
AHSA1	AHA1, activator of heat shock protein ATPase homolog 1 (yeast)	0	0.23	0	0.42	0	0	0.19	0.15	NM_012111	0.19	1.55	0.8	0.23	0.11	0.1	0.4	0.14	NM_146036
AIFM2	apoptosis-inducing factor, mitochondrion-associated 2, transcript variant 1	0	0	0	0	0.21	0	0	0	NM_032797	0	0.24	0.13	0.23	0.46	0.39	0.67	0	NM_153779
AIG1	androgen-induced 1	0.23	0	0	0.21	0	0.52	0	0.75	NM_016108	0	0.12	0	0.12	0.11	0	0	0	NM_025446
AIM1	absent in melanoma 1	0	0.23	0	0	0	0	0.38	0	NM_001624	0	0	0	0	0	0	0.4	0.14	XM_894444
AIM2	absent in melanoma 2	0	0	0	0	0	0	0.19	0	NM_004833	1.12	0.24	0.13	0.23	0	0.1	0.13	0.28	NM_001013779
AIP	aryl-hydrocarbon receptor-interacting protein	0.23	0.69	0.44	0	0.62	0.35	0.57	0.15	NM_003977	0.75	0.12	0	0.12	0.57	0.39	0.67	0.28	NM_016666
AK1	adenylate kinase 1	0	0	0	0	0	0	0	0	NM_000476	0.56	0	0	2.68	1.6	1.08	0.27	0	NM_021515
AK2	adenylate kinase 2, transcript variant AK2A	0.23	0	1.31	0.63	0.41	0.69	0.57	0.75	NM_001625	0	0	0.13	0.12	0	0.1	0.27	0.14	NM_001033966
AK3	adenylate kinase 3	0.46	0.23	0	0.42	0.21	0.69	0.95	0	NM_016282	0.37	1.31	0.53	1.05	0.68	0.59	0.67	0.43	NM_021299
AK3L1	adenylate kinase 3 alpha-like 1	0	2.76	3.28	0.21	0	0.17	0	0.15	AK026966	0.75	3.34	6.37	0	0.23	0.2	0	0.14	NM_009647
AKAP1	A kinase (PRKA) anchor protein 1, nuclear gene encoding mitochondrial protein	0	0.23	0.44	0.21	0	0.69	0.38	0	NM_003488	0	0.36	0.13	0.23	0	0	0.13	0.14	NM_009648
AKAP8	A kinase (PRKA) anchor protein 8	0	0	0.22	0.42	0	0	0	0	NM_005858	0	0.12	0	0.35	0	0	0.13	0	NM_019774
AKAP8L	A kinase (PRKA) anchor protein 8-like	0	0.92	0.22	0.42	0.83	0.69	0.76	0.45	NM_014371	0.37	0.12	0.4	0.47	0.68	1.86	0.94	0.43	NM_017476
AKT1	thymoma viral proto-oncogene 1	0.23	0	0	0.21	0	0	0.38	0.15	NM_005163	0.37	0.12	0	0.93	0.68	0.29	0.27	0.28	NM_009652
AKT1S1	AKT1 substrate 1 (proline-rich)	0.69	0.69	0.66	0.42	1.24	0.87	0.17	0.9	NM_32375	0.56	0.12	0.13	0.81	0.68	0.78	1.08	0.43	NM_026270
AKTIP	thymoma viral proto-oncogene 1 interacting protein	0	0.23	0.22	0	0	0	0	0.15	NM_001012398	0	0	0	0.23	1.03	0.59	0.54	0	NM_010241
ALAD	aminolevulinate, delta-, dehydratase	0.23	0.46	0	0	0	0.35	0.38	0.3	NM_001003945	2.06	2.15	2.92	0.93	0.8	1.08	2.15	3.69	NM_008525
ALAS1	aminolevulinic acid synthase 1	0	0	0.87	0.21	0	0.17	0.95	0.75	NM_000688	1.12	0.36	0.27	0.47	0.8	1.66	0.67	0.43	NM_020559
ALB	albumin	0	9.88	2.84	0	0	0.69	0	0	NM_000477	0	0	0	0	0	0.1	0	0	NM_009654
ALDH16A1	aldehyde dehydrogenase 16 family, member A1	0	0.46	0.22	0	0	0	0.19	0.15	NM_153329	1.87	0	0.53	0.23	0.68	3.53	1.48	0.57	NM_145954
ALDH1A1	aldehyde dehydrogenase 1 family, member A1	0	0.23	2.62	0.63	0.21	0.52	0.38	1.51	NM_000689	0	0	0.13	0	0	0	0	0.28	NM_013469
ALDH1L1	aldehyde dehydrogenase 1 family, member L1	0	0.92	0.87	1.26	0.41	0.52	0.57	0.15	NM_012190	1.12	1.91	1.73	1.51	4.33	2.06	5.24	1.7	NM_027406
ALDH2	aldehyde dehydrogenase 2 family (mitochondrial), nuclear gene encoding mitochondrial protein	0.46	2.07	5.25	1.47	0.62	0.69	1.52	1.81	NM_000690	0	1.91	1.33	0.12	0.34	0.2	0.54	0.71	NM_009656
ALDH3A2	aldehyde dehydrogenase family 3, subfamily A2	0.23	0.92	0.87	0	0	0.17	0.19	0.3	NM_001031806	0	0.84	0.4	0	0.11	0	0.27	0.14	NM_007437
ALDH4A1	aldehyde dehydrogenase 4 family, member A1	0	2.53	1.09	0	0	0.35	0.38	0.3	NM_170726	0.19	11.09	6.11	0.93	1.48	1.47	0.67	0.43	NM_175438
ALDH6A1	aldehyde dehydrogenase 6 family, member A1, nuclear gene encoding mitochondrial protein	0.23	0.92	1.31	0.21	0.21	0	0	0.15	NM_005589	0	0.72	1.06	0.23	0.11	0.2	0.67	0.57	NM_134042
ALDH7A1	aldehyde dehydrogenase 7 family, member A1	0.23	1.38	3.06	0.42	0.41	0.17	0.38	0.3	NM_001182	1.87	1.79	1.06	0.12	0.11	0.2	0.54	0.43	NM_138600
ALDH8A1	aldehyde dehydrogenase 8 family, member A1	0	0.69	0.87	0	0	0	0	0.75	NM_022568	0	1.31	1.73	0	0	0	0	0	NM_178713
ALDH9A1	aldehyde dehydrogenase 9, subfamily A1	0.92	1.61	0.87	0.21	0.21	0	0.38	0.15	NM_000696	0	2.62	1.59	0.93	0.11	0.2	0.27	0.71	NM_019993
ALDOA	aldolase 1, A isoform	0.69	1.15	3.06	2.73	4.75	1.73	4.37	5.27	NM_000034	0.93	1.07	1.86	4.65	2.05	0.2	2.82	12.19	NM_007438
ALDOB	aldolase 2, B isoform	0	59.74	55.76	0.63	1.24	5.36	0.38	1.36	NM_000035	1.31	10.5	5.97	0	0.34	0.49	0.27	0.28	NM_144903
ALDOC	aldolase 3, C isoform	0.23	0.23	0	0	0	0.17	0.19	0.45	NM_005165	0	0	0	2.21	0.8	0.29	1.08	3.12	NM_009657
ALG1	asparagine-linked glycosylation 1 homolog (S. cerevisiae, beta-1,4-mannosyltransferase)	0.23	0.23	0	0.42	0	0.17	0.19	0	NM_019109	0.56	0	0.13	0.35	0.23	0.1	0	0.43	NM_145362
ALG13	asparagine-linked glycosylation 13 homolog (S. cerevisiae)	0.23	0	0.22	0	0.41	0.17	0.38	0.6	NM_018466	0	0.12	0	0	0	0	0	0	NM_026247
ALG5	asparagine-linked glycosylation 5 homolog (yeast, dolichyl-phosphate beta-glucosyltransferase)	0	0	0.22	0	0	0	0	0.3	NM_013338	0	0	0.4	0.12	0.11	0	0.13	0.43	NM_025442
ALKBH5	alkB, alkylation repair homolog 5 (E. coli)	0.23	0.23	0	0	0.23	0.17	0.19	0	NM_017758	1.5	0	0	0.12	0.23	0.2	0.4	0	NM_172943
ALKBH8	alkB, alkylation repair homolog 8 (E. coli)	0	0.23	0	0	0	0	0.38	0	NM_138775	0	0	0	0	0	0	0	0	NM_026303
ALPK2	alpha-kinase 2	0.46	0.46	1.75	0	0	0	0	0	NM_052947	0	0	0	0	0	0	0	0	XM_001002615
ALS2CL	ALS2 C-terminal like	0.92	0	0	0	0.21	0.35	0	0.15	NM_147129	0	0.12	0	0.35	0.34	0.59	0.54	0	NM_146228
ALS2CR2	amyotrophic lateral sclerosis 2 (juvenile) chromosome region, candidate 2 (human)	0	0.23	0.22	0	0	0.17	0	0.3	NM_018571	0.37	0.48	0.53	0.23	0.11	0	0	0.28	NM_172656
AMD1	S-adenosylmethionine decarboxylase 1	0.46	0.69	0	0.21	1.03	0	0.38	0	NM_001634	1.5	0.6	0.13	0.23	0.11	0.1	0.27	0.28	NM_009665
AMDHD2	amidohydrolase domain containing 2	0	0	0.22	0	0	0	0	0.15	NM_015944	0.37	0.48	0.4	0.12	0	0.1	0	0.14	NM_172935
AMFR	autocrine motility factor receptor	0	0.69	0.44	0.84	0	0.69	0.19	0.3	NM_001144	0	0.24	1.06	0.23	0.23	0	0.13	0	NM_011787
AMMECR1L	AMME chromosomal region gene 1-like	0	0.23	0	0	0	0.35	0.19	0	NM_031445	0	0.24	0.27	0.81	0.23	0	0.13	0.28	AK049081
AMN	Amnionless homolog (mouse)	0	3.68	1.09	0.21	0	0	0.38	0.3	AK055802	0	0.6	0	0	0	0	0	0	NM_033603
AMN1	antagonist of mitotic exit network 1 homolog (S. cerevisiae)	0	0	0	0	0	0	0.38	0.15	NM_207337	0	0	0	0	0	0	0	0	AK148759
AMOT	angiomotin	0.23	0	0	0	0	0	0	0	NM_133265	0.19	0.84	0.8	0	0.11	0	0	0.14	NM_153319
AMOTL2	angiomotin like 2	0.92	0.23	0.66	0.21	0	0	0.19	0.15	NM_016201	0.93	0.12	0	0.47	0.34	0.1	0.4	0.71	NM_019764
ANAPC1	anaphase promoting complex subunit 1	0	0.23	0.23	0	0.21	0	0	0	NM_022662	0	0.36	0	0	0.23	0.1	0.13	0.43	NM_008569
ANAPC13	anaphase promoting complex subunit 13	0.23	0.46	1.31	1.05	0.41	1.38	0.95	0.75	NM_015391	0.37	0.95	1.19	0.58	0.23	0.39	0	0.28	NM_181394
ANAPC4	anaphase promoting complex subunit 4	0.23	0	0.22	0	0	0	0	0.15	NM_013367	0	0.36	0	0.12	0.11	0.1	0.54	0	NM_024213
ANAPC5	anaphase promoting complex subunit 5	0.23	0.46	0.44	0.21	1.03	0.35	0.38	0.6	NM_016237	0.19	0	0	0.12	0	0	0.27	0	NM_021505
ANAPC7	anaphase promoting complex subunit 7	0	0	0	0	0	0	0	0	NM_016238	1.31	1.31	0.27	0.35	1.14	0.1	0.54	0.71	NM_019805
ANGPTL3	angiopoietin-like 3	0	1.15	0.66	0	0.41	0.35	0.19	0	NM_014495	0	0	0	0	0	0	0	0	NM_013913
ANGPTL7	angiopoietin-like 7	0.23	0.46	0.66	0.21	0.21	0.35	0.57	0.15	NM_021146	0	1.31	0.53	0	0	0	0	0	NM_001039554
ANKHD1	ankyrin repeat and KH domain containing 1, transcript variant 1	0.23	0.46	0	0.21	0	0.17	0	0	NM_017747	0	0	0	0.12	0	0.2	0	0.14	AK129284
ANKIB1	ankyrin repeat and IBR domain containing 1	0	0	0.22	0	0	0	0	0	NM_019004	0.37	0.84	1.06	0	0.23	0.2	0	0.43	NM_001003909
ANKMY2	Ankyrin repeat and MYND domain containing 2	0	0	0	0	0	0	0	0	NM_020319	0	0	0	0.12	0.23	0.59	0	0.14	AK037644
ANKRD10	ankyrin repeat domain 10	0.92	0.46	0.44	0.21	0.41	0.17	0.38	0.45	NM_017664	0	0.12	0	0.23	0	0	0	0.14	NM_133971
ANKRD11	ankyrin repeat domain 11	0.23	0.23	0	0	0.41	0.17	0	0	NM_013275	0	0	0.27	0.35	0.11	0.29	0.27	0	NM_001081379
ANKRD13A	ankyrin repeat domain 13a	0	0	0.22	0.21	0	0.17	0.19	0.3	NM_033121	0.93	0	0.13	0.58	0.11	0	0.4	0	NM_026718
ANKRD13D	ankyrin repeat domain 13 family, member D	0	0	0	0	0.41	0	0.19	0.15	NM_207354	0	0	0	0	0	0	0	0.14	NM_026720
ANKRD15	ankyrin repeat domain 15	0.69	0.23	0.22	0	0	0	0	0.15	NM_015158	0.75	0.24	0.4	2.09	1.14	0.29	0.4	0.71	NM_181404
ANKRD24	ankyrin repeat domain 24	0	0	0	0	0	0	0	0	NM_133475	0.75	0.24	0	0	0.23	0	0.27	0.14	NM_027480
ANKRD25	ankyrin repeat domain 25	0.46	0	0	0	0	0	0	0.15	NM_015493	0	0	0	0	0	0.1	0	0	NM_145611
ANKRD28	ankyrin repeat domain 28	0.23	0	0	0.21	0	0	0.38	0.15	NM_015199	0	0	0.13	0	0	0	0	0.14	NM_001024605
ANKRD29	ankyrin repeat domain 29	0	0.46	0	0	0	0	0	0	NM_173505	0	0.12	0.13	0	0	0	0	0	AK162301
ANKRD32	ankyrin repeat domain 32	0	0	0	0	0	0	0	0	NM_032290	0	0	0	0.23	0.23	0.1	0.4	0	NM_134071
ANKRD37	ankyrin repeat domain 37	0	0	0.44	0	0	0	0.38	0.75	NM_181726	0	0	0	0	0	0	0	0	NM_8001039562
ANKRD46	ankyrin repeat domain 46	0	0.23	0.66	0	0.41	0	0.38	0	NM_198401	0.93	1.31	1.19	0.93	0.8	0.78	1.34	1.42	NM_175134
ANKRD47	ankyrin repeat domain 47	1.15	0	0	0.21	0	0	0	0.15	NM_198471	0	0	0	0.12	0.11	0	0	0	NM_030697
ANKRD54	ankyrin repeat domain 54	0.23	0	0	0	0	0	0.19	0.15	NM_138797	0	0.48	0.4	1.98	2.05	1.37	0.94	0.85	NM_144849
ANKS1B	ankyrin repeat and sterile alpha motif domain containing 1B, transcript variant 2	0.46	0	0.22	0	0	0	0	0	NM_181670	0	0	0	0	0	0	0	0	XM_001003400
ANKS3	ankyrin repeat and sterile alpha motif domain containing 3	0	0.23	0.22	0	0	0.17	0	0.3	NM_133450	0.56	0.72	0.13	0.12	0	0	0.13	0.43	NM_028301
ANKS4B	ankyrin repeat and sterile alpha motif domain containing 4B	0	0.46	0.44	0	0.21	0	0	0	NM_145865	0	0	0	0	0	0	0	0	NM_028085
ANKZF1	ankyrin repeat and zinc finger domain containing 1	0.23	0	0.22	0	0	0	0.19	0	NM_018089	0	0	0	0.12	0	0.1	0.13	0.43	NM_026187
ANP32B	acidic nuclear phosphoprotein 32 family, member B	0.23	0.46	0	0.21	0	0.35	0.19	0.3	NM_006401	0.19	0.12	0	0	0.57	0.39	0.81	0.43	NM_130889
ANPEP	alanyl (membrane) aminopeptidase	0	6.43	8.97	0	0	0.52	0.19	0.45	NM_001150	0	6.68	2.79	0.12	0.11	0	0	0.14	NM_008486
ANTXR1	anthrax toxin receptor 1, transcript variant 1	0.46	0	0	0	0	0.17	0	0	NM_032208	0	0	0	0	0	0	0	0	NM_054041
ANTXR2	anthrax toxin receptor 2	0.46	0.23	0.22	0	0	0	0.19	0	NM_058172	0.37	0	0	0.12	0	0	0.13	0	NM_133738
ANXA1	annexin A1	2.98	0.23	0	0	0.41	0	0.19	0	NM_000700	0.75	0	0	0.12	0.11	0	0.13	0.57	NM_010730
ANXA11	annexin A11	1.15	0.46	2.62	3.16	2.68	2.42	4.18	5.88	NM_001117	0.19	0.36	0.13	0.7	0.23	0.2	2.55	2.84	NM_013469
ANXA2	annexin A2	11.01	0.23	1.31	0.63	0.83	0.52	2.28	3.16	NM_001002858	12.33	0	0	1.86	1.6	0.29	1.61	0.71	NM_007585
ANXA3	annexin A3	0.46	0	0.22	0.21	0.41	1.04	1.52	1.21	NM_005139	2.24	0	0	0.12	0.11	0	0	0	NM_013470
ANXA5	annexin A5	0.69	0.69	0.87	0.42	0.83	0.52	0.19	0.3	NM_001154	1.87	0.12	0	3.02	2.85	1.96	6.45	2.27	NM_009673
ANXA6	annexin A6	0.23	1.38	0	0	0.21	0.35	0.19	0.15	NM_001155	2.43	0.12	0.13	0.7	0.8	0.59	1.61	2.41	NM_013472
ANXA7	annexin A7	0	0.46	0.44	0	1.03	0.35	0.38	0.45	NM_001156	0	0.12	0.4	0.23	0.23	2.06	1.48	1.13	NM_009674
AOF2	amine oxidase (flavin containing) domain 2, transcript variant 2	0	0.92	0.22	0.63	0.21	0.35	0.38	0.6	NM_015013	0	0	0	0.12	0	0	0.13	0.28	NM_133872
AOX1	aldehyde oxidase 1	0	1.38	2.62	0	0	0	0	0	NM_001159	0	0	0	0	0	0	0	0	NM_009676
AP1M1	adaptor-related protein complex 1, mu 1 subunit	0.46	0.23	0.66	0.21	0	0	0.19	0.15	NM_032493	0.19	0.36	0.27	0.12	0.23	0.1	0.13	0.71	NM_007456
AP1M2	adaptor-related protein complex 1, mu 2 subunit	0.23	0	0.44	0.42	0	0.87	0.57	0.45	NM_005498	0	0	0	0	0	0	0.4	0	NM_009678
AP2M1	adaptor protein complex AP-2, mu1	1.15	0.92	0.44	1.05	2.27	0.87	1.14	0.6	NM_004068	0	0.48	0.93	0.12	0	0.2	0.27	0.43	NM_009679
AP2S1	adaptor-related protein complex 2, sigma 1 subunit	0.23	0.23	0	0.42	0.41	0	0	45	NM_004069	3.18	0.72	0.53	0.58	1.6	0.78	1.75	1.7	NM_198613
AP2S1	adaptor-related protein complex 2, sigma 1 subunit, transcript variant AP17	0.23	0.23	0	0.42	0.41	0	0	0.45	NM_004069	0	0.24	0.13	0	0	0.1	0.27	0.57	NM_007457
AP3B1	adaptor-related protein complex 3, beta 1 subunit	0	0	0	0.42	0.21	0	0.38	0	NM_003664	0	0.12	0	0	0.11	0	0.27	0	NM_009680
AP3D1	Adaptor-related protein complex 3, delta 1 subunit	0.69	0.69	0.44	0.84	0.41	0.17	0.38	0.45	NM_001077523	1.68	2.39	1.19	1.16	1.48	0.29	0.54	1.56	BC053066
AP3S1	adaptor-related protein complex 3, sigma 1 subunit	0.46	0.23	0.22	0	0	0.17	0.19	0.45	NM_001284	0	0.95	0.27	0.12	0.23	0	0.54	0.57	NM_009681
APBA3	Amyloid beta (A4) precursor protein-binding, family A, member 3	0	0	0	0	0	0	0.38	0	AB209603	1.12	0.24	0.13	0.47	1.03	2.94	0.94	1.28	NM_018758
APBB1	amyloid beta (A4) precursor protein-binding, family B, member 1	0.23	0.23	0.22	0	0	0	0.19	0	NM_001164	0.19	0.12	0	0.23	0.46	0.1	0.13	0	NM_009685
APC	adenomatosis polyposis coli	0	0	0	0	0.21	0	0	0	NM_000038	0	0	0.27	0.35	0.46	0.39	1.21	0.28	NM_007462
APEH	N-acylaminoacyl-peptide hydrolase	0.46	2.99	2.62	0.42	1.65	1.21	2.28	1.51	NM_001640	2.43	3.82	1.86	0.58	0.11	0.39	1.08	0.43	NM_146226
APEX1	apurinic/apyrimidinic endonuclease 1	0	0.23	0.22	0.42	0.41	0.17	0.19	0.15	NM_001641	0.19	0	0.27	0	0.46	0.1	1.08	0.99	NM_009687
APH1A	anterior pharynx defective 1 homolog A (C. elegans), transcript variant 2	0.69	0.69	1.09	0.42	0	0.52	0	0.45	NM_016022	0	0.24	0	0	0	0.1	0.13	0	NM_146104
API5	apoptosis inhibitor 5	0.69	0	0	0.63	0.41	0.35	0.19	0.15	NM_006595	0.75	0.12	0.27	1.16	2.05	0.1	1.48	2.13	U35846
APLN	apelin, AGTRL1 ligand	0.46	0	0	0	0	0	0	0	NM_017413	0	0	0	0	0	0.1	0	0	NM_013912
APLP2	amyloid beta (A4) precursor-like protein 2	3.21	5.05	2.41	4.84	2.48	3.98	3.8	2.71	NM_001642	4.86	4.89	9.56	3.72	3.65	2.35	5.91	9.22	NM_009691
APOA1BP	apolipoprotein A-I binding protein	0	0.69	0.44	0.84	1.03	0.52	1.14	0.3	NM_144772	4.11	0.36	0.66	2.33	2.05	7.54	4.03	2.27	NM_144897
APOA4	apolipoprotein A-IV	0	0	0	0	0	0	0	0	NM_000482	0	0	0.53	0	0	0	0	0	NM_007468
APOB	apolipoprotein B	0	0	0	0	0	0	0	0	NM_000384	0	0	0.66	0	0	0	0	0	NM_009693
APOC2	apolipoprotein C-II	0	0.23	0.66	0	0	0	0	0	NM_000483	0	0	0	0	0	0	0	0	NM_009695
APOD	apolipoprotein D	2.98	0	0	0.21	0	0	0	0	NM_001647	0	0	0	0	0	0	0	0	NM_007470
APOM	apolipoprotein M	0	1.61	3.5	0	0	0	0	0.45	NM_019101	3.55	0	0	0.81	1.03	0.49	0.67	0	NM_009696
APP	amyloid beta (A4) precursor protein	27.08	8.5	4.15	22.3	29.94	11.77	18.24	14.76	NM_000484	0.75	2.27	0.66	0.93	1.25	0.2	1.08	1.56	NM_007471
APPBP2	amyloid beta precursor protein (cytoplasmic tail) binding protein 2	0	0	0	0	0	0	0	0	NM_006380	0.37	0	0.27	0	0.11	0.29	0.27	0.14	NM_025825
APPL1	adaptor protein, phosphotyrosine interaction, PH domain and leucine zipper containing 1	0.23	0	0.22	0.21	0	0.17	0.19	0	NM_012096	0	0	0.13	0	0.11	0.2	0	0.57	NM_145221
APPL2	adaptor protein, phosphotyrosine interaction, PH domain and leucine zipper containing 2	0.69	0	0.44	0	0.21	0.17	0.76	0	NM_018171	0	0	0.13	0.12	0.11	0	0.13	0	NM_145220
APRT	adenine phosphoribosyl transferase	0	0.46	0.22	0.42	0.41	0.17	0.19	0.45	NM_000485	0	1.67	0.93	0	0	0	0	0	NM_009698
AQP1	aquaporin 1 (Colton blood group)	1.38	8.04	12.68	0.21	0.21	0.69	0.19	0.9	NM_198098	1.68	5.37	17.39	1.28	0.46	0.78	0.54	0.57	NM_007472
AQP2	aquaporin 2 (collecting duct)	0	0.23	6.78	0.42	0.62	0.52	32.11	31.64	NM_000486	9.16	0	0	1.28	0.34	1.47	284.72	221.48	NM_009699
AQP3	aquaporin 3	0.46	2.07	2.41	0.42	0	0.87	57.76	43.84	NM_004925	5.98	0.12	0	0.7	0.23	0.39	48.53	49.91	NM_016689
AQP4	aquaporin 4	0	0	0	0	0	0	0	0	NM_001650	0	0	0	0	0	0	0	0.57	NM_009700
AQP6	aquaporin 6	0	0	0	0	0	0.35	0.19	1.66	NM_001652	0	0	0	0	0	0.1	4.7	24.96	NM_175087
AQP7	aquaporin 7	0.23	0.46	0.22	0	0	0	0	0.45	NM_001170	0	0	0.13	0	0	0	0	0	NM_007473
AQP9	aquaporin 9	0.46	0	0	0	0	0	0	0	NM_020980	0	0	0	0	0	0	0	0	NM_022026
ARAF	v-raf murine sarcoma 3611 viral oncogene homolog	0	0	0	0	0.21	0	0.19	0.3	NM_001654	0	0.24	0.13	0	0.91	0.49	0.94	0.57	NM_009703
ARCN1	archain 1	0.23	0	0	0.21	0.21	0.35	0.38	0.3	NM_001655	2.24	0.12	0.27	0.47	0.34	0.2	0.27	0.43	NM_145985
ARF1	ADP-ribosylation factor 1	0.69	0	0.22	0	0.62	0.52	0	0.6	NM_001024227	2.62	2.86	2.79	3.61	1.48	4.11	7.39	6.52	NM_007476
ARF3	ADP-ribosylation factor 3	0	0	0.22	0	0	0.35	0.19	0.15	NM_001659	0.19	0.24	0.27	0.23	0.46	0.2	0.4	0.85	NM_007478
ARF4	ADP-ribosylation factor 4	0.23	0.69	0	0.84	0.21	0.17	0.57	1.05	NM_001660	1.68	1.31	1.73	1.63	0.8	0.39	0.54	5.39	BB754834
ARF5	ADP-ribosylation factor 5	2.07	1.38	0.87	1.05	1.45	1.04	1.33	1.36	NM_001662	1.12	1.19	0.13	0.23	0.57	0.59	0.27	1.42	NM_007480
ARF6	ADP-ribosylation factor 6	0.69	0	0	0	0	0.17	0.76	0.45	NM_001663	0.93	0.12	0	0	0.11	0.1	0	0	NM_007481
ARFGAP3	ADP-ribosylation factor GTPase activating protein 3	0	0.23	0	0	0.62	0.17	0.38	0.15	NM_014570	0	0	0	0	0	0	0.13	0.14	NM_025445
ARFGEF1	ADP-ribosylation factor guanine nucleotide-exchange factor 1(brefeldin A-inhibited)	0	0	0	0	0	0.17	0.38	0.3	NM_006421	0	0	0	0	0	0	0	0	AK082234
ARFGEF2	ADP-ribosylation factor guanine nucleotide-exchange factor 2 (brefeldin A-inhibited)	1.15	0.69	0.44	1.47	1.65	0.69	1.71	1.05	NM_006420	0	0.12	0	0	0.11	0	0.27	0.14	NM_001085495
ARG2	arginase, type II, nuclear gene encoding mitochondrial protein	0	0	0.44	0.21	0	0	0.38	0.45	NM_001172	0.56	0	0.93	0	0.11	0	0	0.28	NM_009705
ARHGAP1	Rho GTPase activating protein 1	0	0	0	0	0	0	0	0	NM_004308	0	0.6	0.13	0.35	0.46	0.39	0.81	1.13	NM_146124
ARHGAP10	Rho GTPase activating protein 10	0.23	0.23	0	0	0	0	0	0	NM_024605	0	0	0.4	0	0	0.2	0	0.14	NM_030113
ARHGAP18	Rho GTPase activating protein 18	0.69	0.46	0.22	0	0.21	0.17	0	0	NM_033515	0	0	0	0.12	0	0.39	0.13	0	NM_176837
ARHGAP19	Rho GTPase activating protein 19	0.46	0	0	0	0	0	0	0	NM_032900	0	0	0	0	0	0	0	0	NM_027667
ARHGAP28	Rho GTPase activating protein 28, transcript variant 1	0.69	0	0	0	0.21	0	0	0	NM_001010000	0.93	0	0	0	0	0	0	0	NM_172964
ARHGAP29	Rho GTPase activating protein 29	0	0	0.22	0.21	0	0	0	0	NM_004815	0.56	0.48	0	0.81	2.05	2.06	1.61	0.57	NM_172525
ARHGAP4	Rho GTPase activating protein 4	0.46	0	0	0.63	0.21	0.52	0.57	0.15	NM_001666	0	0	0	0	0	0	0	0	NM_138630
ARHGDIA	Rho GDP dissociation inhibitor (GDI) alpha	1.38	0	0.22	1.05	1.24	0.17	1.52	1.21	NM_004309	0	0	0	0	0	0	0	0	NM_133796
ARHGDIB	Rho, GDP dissociation inhibitor (GDI) beta	0	0	0	0.21	0	0	19	15	NM_001175	0	0	0	0.12	0	0	0.27	7.8	NM_007486
ARHGEF10L	Rho guanine nucleotide exchange factor (GEF) 10-like	0	0	0.22	0.21	0	0	0	0.3	NM_018125	0	0.72	0.27	0	0	0.1	0	0.99	NM_172415
ARHGEF12	Rho guanine nucleotide exchange factor (GEF) 12	1.15	0.46	0.22	0.21	0	0	0	0.3	NM_015313	0.75	0.36	0.13	0.7	1.6	0.49	1.75	0.99	NM_027144
ARHGEF15	Rho guanine nucleotide exchange factor (GEF) 15	0.46	0.23	0	0	0	0	0	0	NM_173728	0.19	0	0	0.12	0	0	0	0	NM_177566
ARHGEF16	Rho guanine nucleotide exchange factor	0	0	0	0	0	0	0	0	NM_014448	0	0.6	0	0.23	0.23	0	0.4	0.28	BC044805
ARHGEF17	Rho guanine nucleotide exchange factor (GEF) 17	0.23	0	0.22	0	0	0.17	0	0	NM_014786	0	0	0	0.12	0.11	0.1	0.27	0	NM_001081116
ARHGEF18	rho/rac guanine nucleotide exchange factor (GEF) 18	0.23	0	0	0.21	0.21	0.17	0.38	0	NM_015318	0	0	0.13	0.35	1.48	0.2	0.54	0.43	NM_133962
ARHGEF2	rho/rac guanine nucleotide exchange factor (GEF) 2	0.23	0.23	0	0.21	0.21	0	0	0.3	NM_004723	0.19	0	0	0.23	0.46	0.59	0.67	0.14	NM_008487
ARHGEF3	Rho guanine nucleotide exchange factor (GEF) 3	0.46	0.23	0	0	0.21	0.17	0.19	0.15	NM_019555	0.19	0.24	0.13	0	0	0.39	0.54	0.85	NM_027871
ARHGEF5	Rho guanine nucleotide exchange factor	0	0	0	0	0	0.17	0	0	NM_005435	0	0.36	0.13	0.47	0	0	0.67	0.71	XM_001481282
ARHGEF7	Rho guanine nucleotide exchange factor (GEF) 7, transcript variant 2	1.15	0.46	0.44	0.21	0.62	0.35	0	0.45	NM_145735	0	0	0.27	0.23	0	0	0.4	0.28	NM_017402
ARID1A	AT rich interactive domain 1A (Swi1 like)	0	0	0	0.21	0.21	0.35	0.19	0	NM_006015	1.68	0	0.13	0.58	0.23	0.2	0.67	0	NM_001080819
ARIH2	ariadne homolog 2 (Drosophila)	0.23	0	0	0.21	0.21	0	0.19	0	NM_006321	0	0	0	0.12	0.34	0.1	0.4	0.14	NM_011790
ARL1	ADP-ribosylation factor-like 1	0.46	0	0	0.21	0	0.35	0.38	0.15	NM_001177	0	0	0	0	0	0	0.13	0	NM_025859
ARL2BP	ADP-ribosylation factor-like 2 binding protein, transcript variant 1	0.46	0	0.44	0.42	0.21	0.35	0.19	0	NM_012106	0.75	0.12	0	0.47	0.68	0.59	5.11	2.41	NM_024191
ARL3	ADP-ribosylation factor-like 3	0	0	0	0	0	0	0	0.15	NM_004311	0.75	0.84	0.53	0.81	0.57	0.69	0.27	0.99	NM_019718
ARL4D	ADP-ribosylation factor-like 4D	0	0	0.22	0	0	0.17	1.52	0.6	NM_001661	0	0	0	0.12	0	0	0.27	1.28	BC016113
ARL5A	ADP-ribosylation factor-like 5A	0	0	0	0	0	0	0.19	0.3	NM_012097	0	0.48	0.4	0.35	0.8	0.1	0.67	0	NM_182994
ARL6	ADP-ribosylation factor-like 6	0	0.23	0	0	0	0	0	0	NM_032146	0	0.48	0.13	0	0.11	0.1	0	0.43	NM_019665
ARL6IP1	ADP-ribosylation factor-like 6 interacting protein 1	0.23	0	1.09	0.42	1.45	0.17	0.76	0.6	NM_015161	1.68	2.62	0.93	1.51	1.6	0.39	0.94	1.99	NM_019419
ARL6IP4	ADP-ribosylation-like factor 6 interacting protein 4, transcript variant 4	0	0	0.44	0	0	0.35	0.38	0.15	NM_001002252	0	0.12	0.27	0	0	0.29	0	0.43	BC063748
ARL6IP5	ADP-ribosylation factor-like 6 interacting protein 5	1.15	0.23	0.22	0.21	0.41	0.17	0.38	0.45	NM_006407	1.31	0	0.13	0.47	0.46	0.29	0.81	0.14	NM_022992
ARL8B	ADP-ribosylation factor-like 8B	0.46	0.69	0.44	0.42	0.41	0.17	0.57	0.9	NM_018184	0	0.12	0.13	0.23	0.11	0.1	0.27	0.43	NM_026011
ARMC10	armadillo repeat containing 10	0	0	0	0.21	0	0.17	0.19	0.15	NM_031905	0	0.24	0.13	0.35	0.11	0	0.4	0.28	NM_026034
ARMC5	armadillo repeat containing 5	0.23	0	0	0	0	0	0.38	0.15	NM_024742	0	0.12	0	0.12	0	0.1	0	0	NM_146205
ARMC6	armadillo repeat containing 6	0.23	0	0	0	0	0.35	0	0.3	NM_033415	0	0.48	0.27	0.35	0.34	0.1	0.27	0	NM_133972
ARMCX1	armadillo repeat containing, X-linked 1	0.23	0	0.22	0.21	0	0	0.38	0	NM_016608	0	0	0	0	0	0	0	0.14	NM_030066
ARMCX5	armadillo repeat containing, X-linked 5	0.23	0	0	0	0	0	0.38	0	NM_022838	0	0	0	0	0	0	0	0.14	NM_001009575
ARMET	arginine-rich, mutated in early stage tumors	0	0	0	0.21	0.83	0.35	0.19	0.15	NM_006010	0	0	0	0	0	0	0	0	NM_029103
ARNT2	aryl hydrocarbon receptor nuclear translocator 2	0	0	0	0.21	0	0	0	0	NM_014862	0	0.12	0	0.47	0.11	0.39	0	0	NM_007488
ARPC1A	actin related protein 2/3 complex, subunit 1A	0.46	0	0.22	0.21	0.41	0.52	0	0.15	NM_006409	2.43	1.07	0.4	1.05	1.37	1.76	3.76	1.56	NM_019767
ARPC1B	actin related protein 2/3 complex, subunit 1B, 41kDa	0.92	0.23	0.22	0	0.21	0	0	0.6	NM_005720	0.37	0	0	0	0	0	0.4	0.57	NM_023142
ARPC2	actin related protein 2/3 complex, subunit 2	0.92	0.46	0.87	0.63	2.48	0	0.76	1.21	NM_152862	3.74	0.72	0.66	0.47	1.82	1.66	1.75	0.99	NM_029711
ARPC3	actin related protein 2/3 complex, subunit 3, 21kDa	5.05	2.76	3.94	1.89	6.19	2.25	2.66	4.52	NM_005719	0	0.6	0.13	0.12	0	0	0	0.57	NM_019824
ARPC4	actin related protein 2/3 complex, subunit 4	0.46	0	0.22	0.84	0	0.35	0.38	0.75	AK125875	0	0.6	0.13	1.16	0.57	0.69	1.48	0.71	NM_026552
ARPC5	Actin related protein 2/3 complex, subunit 5, 16kDa	0	0	0	0	0.41	0	0.19	0	BC034231	0	0.24	0.27	0.12	0.34	0	1.48	0.57	NM_026369
ARPC5L	actin related protein 2/3 complex, subunit 5-like	0	0.69	0.44	0.21	0	0.17	0.19	0.3	NM_030978	0	0.36	0.4	0.35	0.23	0.29	0.27	0.28	NM_028809
ARRDC1	Arrestin domain containing 1	0	0	0	0.21	0	0.17	0	0.3	NM_152285	0	0.24	0.13	0.93	1.03	0.2	0.67	0.71	BC004091
ARS2	arsenate resistance protein 2	0.46	0.46	0.44	0.63	0.83	1.56	1.52	0.45	NM_015908	1.12	0.36	0.13	0.23	0.68	0.49	0.67	0	NM_031405
ARSB	arylsulfatase B	0.23	0.23	0.44	0.21	0.21	0	0.38	0.15	NM_000046	0	1.43	0.27	0	0.23	0.88	0.54	0.28	NM_009712
ARSD	arylsulfatase D, transcript variant 1	0.46	0.46	0.22	0.21	0.41	0.35	0.38	0.45	NM_001669	0.56	0.24	0	0.58	0.57	0	0.81	0	NM_144829
ARVCF	armadillo repeat gene deleted in velo-cardio-facial syndrome	0.23	0.23	0	0	0	0	0	0	NM_001670	1.5	0.12	0.13	0.12	0.11	0	0	0.57	NM_033474
ASAH1	N-acylsphingosine amidohydrolase 1	0.92	0.46	1.31	0.84	1.86	1.56	1.9	1.66	NM_177924	0	0	0.8	0.47	0.23	0	0.13	0.71	NM_019734
ASAH3L	N-acylsphingosine amidohydrolase 3-like	0	0	0	0	0	0	0	0	NM_001010887	1.12	0	0	0	0	0.1	0.27	0.14	NM_139306
ASB13	ankyrin repeat and SOCS box-containing 13	0.23	1.15	1.09	0	0.21	0.17	0.19	0.3	NM_024701	0	0.24	0.27	1.05	1.48	0.39	0	0	NM_027027
ASB6	ankyrin repeat and SOCS box-containing protein 6	0	0	0	0	0	0	0	0.15	NM_017873	0	0.24	0	0.23	0.46	0.2	1.08	0.71	NM_133346
ASCC3	activating signal cointegrator 1 complex subunit 3, transcript variant 1	0	0.46	0	0	0.21	0	0	0	NM_006828	0	0	0	0	0	0	0	0	XM_125617
ASCC3L1	activating signal cointegrator 1 complex subunit 3-like 1	0.23	0.46	0	0	0	0	0	0	NM_014014	0.56	0.12	0	0.12	0.11	0.1	0	0.28	NM_177214
ASNA1	arsA arsenite transporter, ATP-binding, homolog 1 (bacterial)	1.15	1.84	0.44	0.42	0.41	1.38	0.57	1.21	NM_004317	0.19	0.36	0.27	0.58	0.68	0.69	0.67	1.13	NM_019652
ASNSD1	asparagine synthetase domain containing 1	0.46	0.23	0.22	0	0.21	0.17	0.19	0.3	NM_019048	0	0.12	0.13	0.12	0.11	0.1	0	0.28	NM_133728
ASPA	aspartoacylase (aminoacylase) 2	0	0	0.87	0	0	0	0	0	NM_000049	0.75	1.07	1.33	0	0	0	0.13	0	NM_023113
ASPSCR1	alveolar soft part sarcoma chromosome region, candidate 1	0.23	0.46	0	0.21	0.21	0.17	0.19	0.15	NM_024083	0	0	0	0	0	0	0	0	NM_026877
ASRGL1	asparaginase like 1	0	0.46	0.66	0.63	0.41	0.35	0.38	0	NM_001083926	0	0	0.13	0	0	0	0	0.43	NM_025610
ASS1	argininosuccinate synthetase 1	1.15	33.55	9.18	0.42	0.83	1.21	0.17	1.66	NM_000050	0	10.26	4.25	0.23	0	0.49	0.13	0	NM_007494
ATAD1	ATPase family, AAA domain containing 1	0.23	0	0	0	0	0.17	0	0.3	NM_032810	0.19	0.24	0.4	0.35	0.23	0	0.27	0.14	NM_026487
ATAD3A	ATPase family, AAA domain containing 3A	0	0	0.22	0	0	0	0	0	NM_018188	2.24	1.43	0	2.33	1.71	0.39	0.67	1.13	NM_179203
ATAD4	ATPase family, AAA domain containing 4	0	0	0	0.21	0.21	0.17	0	0.15	NM_024320	0.56	0.36	0.4	1.4	2.73	4.21	2.42	1.42	NM_146026
ATE1	arginine-tRNA-protein transferase 1, transcript variant 1	0	0	0.22	0	0	0	0	0	NM_001001976	0	0	0	0.23	0.11	0	0.27	0.43	NM_013799
ATF2	activating transcription factor 2	0.46	0	0	0	0.41	0.17	0.19	0	NM_001880	0.19	0.36	0	0.12	0.23	0	0.13	0	NM_001025093
ATF3	activating transcription factor 3	1.61	0.46	0.44	2.52	2.48	2.25	5.51	7.38	NM_001674	0.19	0	0.13	0.12	0.34	0	0.27	0.28	NM_007498
ATF4	activating transcription factor 4	1.61	0.69	0.66	0.84	0.41	1.38	0.76	1.66	NM_001675	0.37	1.07	0.66	0.93	0.91	0.1	0.94	0.43	NM_009716
ATG12	autophagy-related 12 (yeast)	0	0	0	0	0.21	0	0	0	NM_004707	0	0.12	0	0.12	0.23	0.1	0.27	0	NM_026217
ATG2A	ATG2 autophagy related 2 homolog A (S. cerevisiae)	0	0	0	0.21	0.21	0	0.57	0.15	NM_015104	0.37	0.24	0.8	0	0.57	0	0.13	0.99	NM_194348
ATG5	autophagy-related 5 (yeast)	0	0	0	0.21	0	0	0	0	NM_004849	1.5	0.12	0.27	0.12	0.46	1.18	0.81	0.14	NM_053069
ATG7	ATG7 autophagy related 7 homolog (S. cerevisiae)	0	0	0	0	0.62	0	0.19	0	AL122075	0.56	0	0	0	0	0	0.13	0	NM_028835
ATG9A	autophagy-related 9A (yeast)	0	0	0	0.42	0	0.35	0.38	0	NM_001077198	0	0	0.13	0.35	0.57	0.1	0.54	0.14	NM_001003917
ATHL1	ATH1, acid trehalase-like 1 (yeast)	0	0.23	0	0	0	0	0	1.36	NM_025092	0.75	0.72	0	0	0	0.1	0.4	0.14	NM_145387
ATN1	atrophin 1	0.46	0.23	0.22	0.42	0.21	0.35	0.38	0.75	NM_001007026	0	0	0.13	0.58	0.8	0	0.54	0.85	NM_007881
ATOX1	ATX1 antioxidant protein 1 homolog (yeast)	0.46	1.61	0.44	0.21	0.62	0.87	0.38	0.9	NM_004045	1.87	6.2	1.99	1.51	1.37	0.88	0.94	1.56	NM_009720
ATP11A	ATPase, class VI, type 11A	0	0.23	1.09	0.42	0.41	0	0	0	NM_015205	0	0	0	0.12	0	0	0.27	0	NM_015804
ATP11B	ATPase, Class VI, type 11B	0.23	0	0	0	0	0	0	0	NM_014616	0	0	0.13	0.23	0.11	0.2	0.13	0.28	NM_029570
ATP12A	ATPase, H+/K+ transporting, nongastric, alpha polypeptide	0	0	0	0	0	0.17	0	0	NM_001676	0	0	0	0	0	0	0.13	0.43	NM_138652
ATP13A1	ATPase type 13A1	0.23	0	0	0.42	0	0	0	0	NM_020410	0.75	0.12	0	0	0.23	0.1	0.13	0.71	NM_133224
ATP13A2	ATPase type 13A2	0.23	0	0	0	0	0	0.19	0	NM_022089	0.75	0.12	0.13	0.47	0.34	0	0.54	1.13	NM_029097
ATP1A1	ATPase, Na+/K+ transporting, alpha 1 polypeptide	0.92	2.07	1.31	10.94	18.79	5.88	1.52	2.11	NM_000701	7.85	4.41	6.11	56.06	43.19	28.99	7.12	4.54	NM_144900
ATP1B1	ATPase, Na+/K+ transporting, beta 1 polypeptide	4.13	10.57	5.69	22.93	27.46	26.99	11.59	11.75	NM_001677	7.29	3.1	2.39	48.97	43.41	19.59	20.84	19.85	NM_009721
ATP1B3	ATPase, Na+/K+ transporting, beta 3 polypeptide	0.69	0	0	0.42	0.41	0.35	0.95	0.3	AK094673	0.19	0	0.27	1.28	0.57	0.2	1.21	1.13	NM_007502
ATP2A2	ATPase, Ca++ transporting, cardiac muscle, slow twitch 2, transcript variant 1	0	0	0	0.21	0	0.17	0.38	0.15	NM_170665	0	0	0.13	0.47	0.34	0	0	0.14	NM_009722
ATP2B1	ATPase, Ca++ transporting, plasma membrane 1	0	0	0	0	0	0	0	0	NM_001001323	0	0	0.27	0.35	0.11	0	0.27	0	NM_026482
ATP4A	ATPase, H+/K+ exchanging, gastric, alpha polypeptide	0	0	0	0	0	0	0	0	NM_000704	0.37	0	0	0.12	0.23	0.78	0.54	0	NM_018731
ATP5A1	ATP synthase, H+ transporting, mitochondrial F1 complex, alpha subunit, isoform 1	0.92	2.07	4.81	3.79	1.45	2.77	1.71	1.05	NM_001001937	7.85	8.23	6.24	31.64	37.6	50.44	23.93	6.95	NM_007505
ATP5B	ATP synthase, H+ transporting, mitochondrial F1 complex, beta polypeptide, nuclear gene encoding mitochondrial protein	1.61	3.68	4.59	7.15	5.37	8.83	9.5	4.67	NM_001686	0.75	0.72	0.4	0.23	0.57	0.49	0.13	1.52	NM_016774
ATP5C1	ATP synthase, H+ transporting, mitochondrial F1 complex, gamma polypeptide 1	1.38	0.69	1.75	3.16	2.68	2.08	1.9	1.66	NM_001001973	3.92	3.82	3.05	6.51	13.79	45.83	15.86	5.53	NM_020615
ATP5D	ATP synthase, H+ transporting, mitochondrial F1 complex, delta subunit, nuclear gene encoding mitochondrial protein	0.23	0.23	0.66	0.42	0.41	0.69	0.76	0.45	NM_001687	1.31	2.39	0.93	2.56	3.08	3.23	2.82	2.41	NM_025313
ATP5E	ATP synthase, H+ transporting, mitochondrial F1 complex, epsilon subunit	3.9	7.12	3.5	4	2.48	6.23	4.75	4.82	NM_006886	2.43	11.81	4.91	8.37	7.75	4.41	5.11	6.66	NM_025983
ATP5G2	ATP synthase, H+ transporting, mitochondrial F0 complex, subunit c (subunit 9), isoform 2	0	0	0	0	0	0	0	0	NM_001002031	2.24	3.7	6.9	8.03	3.87	2.15	3.36	4.82	NM_026468
ATP5G3	ATP synthase, H+ transporting, mitochondrial F0 complex, subunit c (subunit 9), isoform 3	1.61	1.38	2.19	3.58	1.86	2.94	1.9	1.51	NM_001689	2.43	19.21	12.22	16.17	14.47	5.88	8.2	7.94	NM_175015
ATP5H	ATP synthase, H+ transporting, mitochondrial F0 complex, subunit d	1.61	1.38	2.41	2.95	3.1	3.29	1.52	2.11	NM_006356	16.82	7.28	5.58	18.38	35.78	16.75	26.48	11.34	NM_027862
ATP5J	ATP synthase, H+ transporting, mitochondrial F0 complex, subunit F	2.07	1.61	0.66	2.95	3.3	2.94	1.9	1.66	NM_001003703	1.12	2.39	2.79	1.63	4.56	6.27	2.82	1.99	NM_016755
ATP5L	ATP synthase, H+ transporting, mitochondrial F0 complex, subunit G, nuclear gene encoding mitochondrial protein	0.69	0.46	0.87	0.21	0	0.35	0	0.3	NM_006476	2.06	9.78	4.91	5	3.53	1.96	0.67	3.12	NM_013795
ATP6	mitochondrially encoded ATP synthase 6	16.06	48.02	283.38	119.07	35.1	117.67	34.58	55.44	NC_001807.4 (8528..9208)	461.61	88.99	155.88	938.84	484.39	687.21	278.13	309.26	NC_005089.1 (7927..8607)
ATP6AP1	ATPase, H+ transporting, lysosomal accessory protein 1	0.92	1.38	0.87	1.89	2.89	1.56	2.28	1.66	NM_001183	0.56	0.36	0.53	1.16	1.03	6.76	4.17	1.28	NM_018794
ATP6AP2	ATPase, H+ transporting, lysosomal accessory protein 2	1.38	0.69	0.66	0.42	0	1.21	1.71	0.3	NM_005765	2.8	0.72	1.19	0.47	1.25	1.47	8.74	2.27	NM_027439
ATP6V0A1	ATPase, H+ transporting, lysosomal V0 subunit a1	0.23	0.69	0.66	0	0	0	0	0	NM_005177	0.56	0.84	0	0.47	0.34	0.1	0.13	0.28	NM_016920
ATP6V0A4	ATPase, H+ transporting, lysosomal V0 subunit A4	0	0	0	0.42	0.62	0.87	0.57	0.75	NM_020632	0.19	0.84	0.4	0.35	1.14	1.47	4.97	1.84	NM_080467
ATP6V0B	ATPase, H+ transporting, lysosomal 21kDa, V0 subunit b	0	0	0	0.42	0.41	0.17	0.19	0.15	CR596289	4.67	1.31	0.4	4.07	3.3	2.45	14.65	5.53	NM_033617
ATP6V0C	ATPase, H+ transporting, lysosomal V0 subunit C	1.61	2.76	4.59	1.89	4.75	4.33	3.8	4.67	NM_001694	5.79	6.32	9.03	4.77	3.53	2.64	10.35	13.75	NM_009729
ATP6V0D1	ATPase, H+ transporting, lysosomal V0 subunit D1	0.23	1.38	0.87	1.26	2.06	0.52	1.33	0.75	NM_004691	0	0.72	0.4	0.58	1.25	0.2	1.08	0.71	NM_013477
ATP6V0E2	ATPase, H+ transporting, lysosomal V0 subunit E2	0	0.23	0.44	0.42	0	0.17	0.19	0	NM_145230	0	0.72	0.4	0.47	0.46	0.1	0	0.71	NM_133764
ATP6V1A	ATPase, H+ transporting, lysosomal 70kDa, V1 subunit A	1.38	0.69	1.97	0.84	2.48	0.69	1.33	2.56	NM_001690	0.37	0.6	0.8	1.05	0.57	1.47	2.55	2.84	NM_007508
ATP6V1B1	ATPase, H+ transporting, lysosomal V1 subunit B1	0	0.23	0.22	0.63	11.77	3.11	3.23	0.75	NM_001692	0.93	0	0	0.23	0.46	0.2	1.75	3.69	NM_134157
ATP6V1B2	ATPase, H+ transporting, lysosomal 56/58kDa, V1 subunit B2	0.23	0.23	1.31	0	0	0.35	0.19	0.15	NM_001693	0.75	1.79	1.06	0.93	0.8	0.88	1.21	1.13	NM_007509
ATP6V1C1	ATPase, H+ transporting, lysosomal V1 subunit C1	0	0.23	0.22	0	0	0	0	0	NM_001695	0	0.12	0.27	0.23	0.34	0	0.27	0.43	AK129007
ATP6V1D	ATPase, H+ transporting, lysosomal V1 subunit D	0	0	0.44	0	0	0	0	0.3	NM_015994	1.12	0.84	0.4	0.93	1.37	0.69	2.42	2.27	NM_023721
ATP6V1E1	VATPase, H+ transporting, lysosomal V1 subunit E1	0.92	0.23	0.66	0.42	0	1.21	0.38	1.21	NM_001696	0.37	0	0	0	0.23	0.59	0.4	0.28	NM_007510
ATP6V1F	ATPase, H+ transporting, lysosomal 14kDa, V1 subunit F	0	0.46	0.44	0.21	0.83	0.52	0.95	1.66	NM_004231	2.99	1.55	0.4	2.91	6.95	5.48	15.73	7.09	NM_025381
ATP6V1G1	ATPase, H+ transporting, lysosomal V1 subunit G1	0	0	0	0	0	0	0	0	NM_004888	0.93	7.52	1.46	1.51	1.25	0.49	1.21	0.71	NM_024173
ATP6V1G3	ATPase, H+ transporting, lysosomal V1 subunit G3	0	0	0	0	0	0.52	0.76	0.3	NM_133262	0	0	0	0	0	0	0.27	0.28	NM_177397
ATP6V1H	ATPase, H+ transporting, lysosomal V1 subunit H	0	0.69	0.44	0.42	0	0.52	0.38	0.15	NM_015941	0	0.36	0.27	0.12	0.11	0.1	1.88	0.28	NM_133826
ATP8B2	ATPase, Class I, type 8B, member 2, transcript variant 1	0.46	0	0	0	0	0	0	0	NM_020452	0.37	0	0	0	0.23	0	0	0	NM_001081182
ATP9B	ATPase, Class II, type 9B	0	0	0	0	0.21	0	0.38	0	NM_198531	0	0	0	0	0	0.2	0.27	0	NM_015805
ATPAF2	ATP synthase mitochondrial F1 complex assembly factor 2, nuclear gene encoding mitochondrial protein	0	0.46	0.22	0.21	0.21	0.17	0	0.15	NM_145691	0.37	0.84	0.53	0.81	0.46	0.2	0.27	0.57	NM_145427
ATPBD4	ATP binding domain 4	0.46	1.38	0	1.26	0.41	1.04	0.38	0.3	BX537862	0.93	0	0	0	0.23	0	0	0	NM_025675
ATPIF1	ATPase inhibitory factor 1	4.36	2.07	4.37	1.68	9.7	1.73	2.85	2.56	NM_016311	0.93	4.77	3.98	0.58	0.11	0.78	0.67	0.85	NM_007512
ATRX	alpha thalassemia/mental retardation syndrome X-linked homolog (human)	0	0	0	0	0	0	0	0	NM_000489	0.19	0	0	0.12	0	0	0.4	0.14	NM_009530
ATXN2	ataxin 2	1.61	0.23	0	0	0.21	0.17	0.38	0	NM_002973	1.31	2.03	1.46	0.81	0.68	0.2	0.81	1.28	NM_009125
ATXN2L	ataxin 2-like	0.46	0	0.22	0	0	0	0.19	0.3	NM_007245	0	0.36	0.13	0.12	0.11	0.39	0.27	0	NM_183020
ATXN7L2	ataxin 7-like 2	0	0.23	0	0	0.21	0	0	0	NM_153340	0	0.36	0.13	0.23	0	0.1	0	0.28	NM_175183
AUH	AU RNA binding protein/enoyl-Coenzyme A hydratase, nuclear gene encoding mitochondrial protein	0.46	0.23	0	1.05	0.62	0	0.76	0.15	NM_001698	0	0.36	0.27	0.23	0.23	0.39	0.27	0.57	NM_016709
AUP1	ancient ubiquitous protein	0.92	0.46	0.66	0	0	0.52	0.76	0.15	NM_181575	1.12	0.48	0.66	0.23	0.34	0	0.27	0.57	NM_007517
AURKAIP1	aurora kinase A interacting protein 1	0.69	2.99	3.28	2.95	1.03	3.11	2.66	2.26	NM_017900	0.19	0.72	0.13	0.93	0.34	0	0.54	0.57	NM_025338
AVEN	apoptosis, caspase activation inhibitor	0	0	0.66	0	0	0	0	0	NM_020371	0	0.12	0.27	0.12	0	0.29	0.27	0.14	NM_028844
AVPR1A	arginine vasopressin receptor 1A	0	0	0	0	0	0	0	0	NM_000706	0	0	0	0	0	0	0.13	0.57	NM_016847
AVPR2	arginine vasopressin receptor 2 (nephrogenic diabetes insipidus)	0	0	0	0	0	0	0.38	0.15	NM_000054	0.19	0	0	0.35	0.11	0	1.61	7.52	NM_019404
AXUD1	AXIN1 up-regulated 1	0.23	0	0	0	0	0.35	0.19	0.75	NM_033027	0	0	0	0	0.34	0	0	0.43	NM_153287
AZGP1	alpha-2-glycoprotein 1, zinc-binding	0.23	7.58	6.56	0	0.21	1.38	0.38	0.75	NM_001185	0	0	0	0	0	0	0	0	NM_013478
B3GAT3	beta-1,3-glucuronyltransferase 3 (glucuronosyltransferase I)	0	0.23	0	0	0	0	0	0.3	NM_012200	0	1.55	1.19	0.23	1.03	0.29	0.81	0.14	NM_024256
B3GNT1	UDP-GlcNAc:betaGal beta-1,3-N-acetylglucosaminyltransferase 1	0.46	0	0	0.21	0	0	0	0	NM_006876	0	0.84	0.8	0.58	0.46	0.1	0.13	0.85	NM_175383
B3GNT2	UDP-GlcNAc:betaGal beta-1,3-N-acetylglucosaminyltransferase 2	0.46	0	0	0.84	0.41	0.35	0.19	0.45	NM_006577	0	0	0.27	0.12	0.34	0.1	0.27	0	NM_016888
B4GALT1	UDP-Gal:betaGlcNAc beta 1,4- galactosyltransferase, polypeptide 1	0.46	1.38	0.44	0.42	0	0.17	0.76	2.11	NM_001497	0.19	0.48	0	0.35	0.23	0	0.4	0.28	NM_022305
B4GALT3	UDP-Gal:betaGlcNAc beta 1,4-galactosyltransferase, polypeptide 3	0.23	0	0.87	0	21	0.17	0	0	NM_003779	0	0	0.13	0.35	0	0	0.27	0.71	NM_020579
B4GALT5	UDP-Gal:betaGlcNAc beta 1,4- galactosyltransferase, polypeptide 5	0	0.46	0	0	0.41	0	0.19	0.75	NM_004776	0	0.24	0.53	0.12	0	0.2	0	0	NM_019835
BAD	Bcl-associated death promoter	0.23	0	0	0	0.83	0	0.95	0.3	NM_004322	0	0.48	0.27	0.58	0.23	0.49	0.67	0.14	NM_007522
BAG1	Bcl2-associated athanogene 1	0	0	0	0	0	0	0	0.15	NM_004323	0.19	0.6	0.13	1.74	2.85	0.2	1.75	0.99	NM_009736
BAG2	Bcl2-associated athanogene 2	0	0	0	0	0	0	0	0	NM_004282	0	0.24	0	0.23	0.11	0	0.67	0	NM_145392
BAG3	BCL2-associated athanogene 3	0.23	0	0.22	0.42	0	0	0.19	0.45	NM_004281	0	0	0	0.23	0.11	0	0.4	0.14	NM_013863
BAG5	BCL2-associated athanogene 5	0	0	0	0	0	0	0	0	NM_001015049	0.56	0.12	0.13	0.23	0.57	0.1	0.54	0	NM_027404
BAIAP2	BAI1-associated protein 2, transcript variant 3	0.23	0.69	0	0	0	0	0	0	NM_006340	0	0.12	0.13	0	0.11	0	0.27	0	NM_130862
BAIAP2L2	BAI1-associated protein 2-like 2	0	0	0.44	0	0.21	0	0	0	NM_025045	0.75	0.36	1.33	3.26	4.79	0.88	1.21	1.7	NM_177580
BAIAP3	BAI1-associated protein 3	0.23	0	0.44	0.21	0.41	0.17	0.19	0.15	NM_003933	0	0	0	0	0	0	0	0	AK122358
BAK1	BCL2-antagonist/killer 1	0	0	0.22	0	0.21	0	0.38	0.45	NM_001188	0	0.12	0	0.12	0.11	0	0	0.28	NM_07523
BAMBI	BMP and activin membrane-bound inhibitor homolog (Xenopus laevis)	0.46	0	0	0	0	0	0	0	NM_012342	0	0	0	0	0	0	0	0	NM_026505
BANF1	barrier to autointegration factor 1	3.44	2.76	0.87	1.68	1.45	2.6	2.85	2.56	NM_003860	2.8	1.43	0.53	0.81	4.22	3.13	2.96	2.27	NM_011793
BANP	Btg3 associated nuclear protein	0	0	0	0	0.21	0	0.19	0	NM_017869	0	0	0	0	0.23	0	0.27	0.14	NM_016812
BAP1	BRCA1 associated protein-1 (ubiquitin carboxy-terminal hydrolase)	0.69	0.92	0.66	0.63	0.62	0	0.76	0.45	NM_004656	0	0.12	0.13	0	0	0	0.54	0	NM_027088
BAT2	HLA-B associated transcript 2	0.23	0	0	0.21	0.41	0	0.19	0.15	NM_080686	0.56	0	0	0.58	0.46	0.1	0.67	0.28	NM_020027
BAT3	HLA-B-associated transcript 3	0.23	1.15	0	0.63	0	0.52	0.38	0.6	NM_004639	1.68	0.84	0.93	0.93	1.14	0.39	1.21	0.99	NM_057171
BAT4	HLA-B associated transcript 4	0.23	0.23	0.22	0.21	0.21	0.35	0.38	0.15	NM_033177	0	0.36	0	0.12	0	0	0.13	0	NM_032460
BAT5	HLA-B associated transcript 5	0	0	0.22	0	0	0.52	0	0.3	NM_021160	0	0.36	0	0.35	0.57	0	0.27	1.28	NM_178592
BAX	Bcl2-associated X protein	0	0.23	0	0	0.21	0	0.19	0.15	NM_138761	0.93	0.12	0.27	0.58	0.68	0.1	0.81	0.43	NM_007527
BAZ1B	bromodomain adjacent to zinc finger domain, 1B	0.23	0.23	0	0.42	0	0	0.38	0	NM_032408	0	0	0	0	0	0	0	0	NM_011714
BAZ2A	bromodomain adjacent to zinc finger domain, 2A	0	0	0.22	0.21	0.21	0.35	0.57	0.15	NM_013449	0	0.12	0.4	0.12	0.34	0	0.4	0.43	NM_054078
BAZ2B	bromodomain adjacent to zinc finger domain, 2B	0	0	0	0	0	0	0	0.15	NM_013450	0.75	0	0.27	0.12	0.23	0.1	0.13	1.13	NM_001001182
BBOX1	butyrobetaine (gamma), 2-oxoglutarate dioxygenase (gamma-butyrobetaine hydroxylase) 1	0	2.3	4.15	0	0.83	0.17	0	0.6	NM_003986	0	0	0	0	0	0	0	0	NM_130452
BBS1	Bardet-Biedl syndrome 1	0	0.23	0	0	0.21	0	0.76	0.3	NM_024649	0	0	0	0	0	0	0	0	NM_001033128
BBS2	Bardet-Biedl syndrome 2 homolog (human)	0.23	0	0.22	0	0.41	0.17	0	0.45	NM_031885	0	0	0.13	0.35	0.11	0.1	0.4	0.14	NM_026116
BCAM	basal cell adhesion molecule	5.74	0	1.31	2.31	3.1	0.52	2.28	0.45	NM_005581	20.93	0	0	2.56	2.62	2.45	8.33	9.5	NM_020486
BCAR1	breast cancer anti-estrogen resistance 1	0.23	0	0.22	0	0	0.35	0.19	0.3	NM_014567	1.31	0.48	0.27	0.47	0	1.08	0.13	1.13	NM_009954
BCAR3	breast cancer anti-estrogen resistance 3	1.61	0.92	0.44	0	0	0	0.38	0	NM_003567	0.37	0	0.13	0.23	0	0.1	0.13	0.14	NM_013867
BCAS2	breast carcinoma amplified sequence 2	0.46	0.23	0.22	0.21	0.41	0.17	0.19	0	NM_005872	1.87	2.15	3.72	1.05	0.68	0.29	0.81	2.27	NM_026602
BCAT2	branched chain aminotransferase 2, mitochondrial	0	0	0.22	0	0.83	0	0.19	0.3	NM_001190	2.8	0.12	0.13	1.51	3.3	3.53	1.21	0.43	NM_009737
BCCIP	BRCA2 and CDKN1A interacting protein, transcript variant B	0.23	0	0.22	0	0.41	0.35	0.57	0	NM_078468	0	1.19	0.53	0.23	0.34	0.1	0.13	0	NM_025392
BCKDHA	branched chain keto acid dehydrogenase E1, alpha polypeptide	0	0	0.22	1.47	0.41	0.69	1.14	0.6	NM_000709	1.12	1.43	1.19	3.26	1.37	2.35	2.42	1.7	NM_007533
BCKDHB	branched chain ketoacid dehydrogenase E1, beta polypeptide	0	0.46	0.22	0.63	0.83	0.17	0.19	0.15	NM_183050	0.19	0	0	1.4	1.37	0.78	0.13	0.14	NM_199195
BCL2L1	Bcl2-like 1	0.46	0.46	0.44	0.63	0.62	0.52	0	0.3	NM_138578	0.75	0.36	0	0.58	0.23	0.29	0.94	1.99	NM_009743
BCL2L12	BCL2-like 12 (proline rich)	0	0	0	0	0	0.17	0	0.3	NM_138639	0	0.12	0.13	0.12	0.11	0.1	0.13	0.57	NM_029410
BCL2L13	BCL2-like 13 (apoptosis facilitator), nuclear gene encoding mitochondrial protein	0.69	0	0.44	0	0	0	0	0	NM_015367	0	0.24	0	0.23	0.23	0.1	0	0	NM_153516
BCL2L2	BCL2-like 2	1.15	0	0	0	0	0.35	0	0	NM_004050	0.56	0.12	0	0.23	0.23	0	0.13	0.28	NM_007537
BCL3	B-cell CLL/lymphoma 3	1.61	0.69	0.44	0.42	0.62	1.04	1.52	1.05	NM_005178	0	0	0	0	0.11	0	0	0	NM_033601
BCL7C	B-cell CLL/lymphoma 7C	0.23	0.23	0.22	1.26	1.03	0.87	0.19	0.75	NM_004765	1.5	0.6	0	0.58	0.57	0.2	0.4	0.14	NM_009746
BCOR	BCL6 co-repressor, transcript variant 1	0	0	0	0	0	0	0.38	0	NM_017745	0	0	0	0	0	0	0.13	0	NM_175045
BDH1	3-hydroxybutyrate dehydrogenase, type 1	0	0	0	0	0.41	0	0	0	NM_004051	0	0.24	3.19	0.93	0.46	0.2	0	0.99	NM_175177
BDH2	3-hydroxybutyrate dehydrogenase, type 2	0	0.22	0	0	0	0	0	0	NM_020139	0	0.84	0.53	0	0	0	0	0	NM_027208
BDP1	B double prime 1, subunit of RNA polymerase III transcription initiation factor IIIB	0	0	0.22	0.21	0	0	0	0.15	NM_018429	0	0.36	0.13	0.12	0	0.1	0.4	0	NM_001081061
BECN1	beclin 1 (coiled-coil, myosin-like BCL2 interacting protein)	0.92	0	0	0.63	0.62	0.35	0.57	1.05	NM_003766	0.75	0	0	0.12	0	0.98	0.54	0.14	NM_019584
BET1L	Blocked early in transport 1 homolog (S. cerevisiae)-like	0	0	0	0.21	0.62	0	0.38	0	NM_001098787	1.68	0.36	0	0.58	0.23	0.39	0.13	0.57	AK158871
BEX2	brain expressed X-linked 2	0.92	0.69	0.22	0.63	0.41	0.17	0.19	0.3	NM_032621	0	0	0	0	0	0.1	0.13	0.14	NM_009749
BFAR	bifunctional apoptosis regulator	0.92	0.69	0.66	0.63	0.62	0.35	0.57	0.6	NM_016561	0	0	0	0	0.11	0	0.13	0	NM_025976
BFSP1	beaded filament structural protein 1, filensin	0.23	0	0	0.42	0	0	0	0	NM_001195	0	0	0	0	0	0	0	0	NM_009751
BGN	biglycan	1.38	0	0	0	0	0	0	0	NM_001711	2.99	0	0	0.12	0.11	0.49	0.54	0	NM_007542
BHLHB2	basic helix-loop-helix domain containing, class B, 2	0.46	0.46	1.97	1.26	1.65	1.04	5.89	4.22	NM_003670	0	0.12	0.66	0.23	0	0	0	0.85	NM_011498
BHLHB5	basic helix-loop-helix domain containing, class B, 5	0	0.23	0.44	0.21	0	0	0	0.45	NM_152414	0	0	0	0	0	0	0	0	NM_021560
BHMT	betaine-homocysteine methyltransferase	0.23	5.97	6.34	0	0	0.35	0.19	0.3	NM_001713	0	0	0	0	0	0	0	0	NM_016668
BHMT2	betaine-homocysteine methyltransferase 2	0.46	3.68	2.62	0.63	0.83	0.35	0.57	1.81	NM_017614	0	0.72	1.46	0	0	0	0	0	NM_022884
BICC1	bicaudal C homolog 1 (Drosophila)	0	0	0	0	0	0	0	0.15	NM_001080512	0	0.12	0.13	0.35	0.34	0.2	0.27	0.71	NM_031397
BID	BH3 interacting domain death agonist	0	0	0	0	0	0	0	0	NM_197966	0	0.84	0.4	0	0	0	0	0.28	NM_007544
BIK	Bcl2-interacting killer	0	0	0	0	0	0.17	0.19	0	NM_001197	0.93	0.72	0.13	0.12	0	0.1	0	0.43	NM_007546
BIN3	bridging integrator 3	0	0	0	0	0	0	0	0	NM_018688	0.19	0	0	0	0.11	0.49	0.4	0.14	NM_021328
BIRC2	baculoviral IAP repeat-containing 2	0.92	0	0.22	0	0	0	0	0	NM_001166	0.19	0	0	0.12	0	0	0	0.43	NM_007465
BLCAP	bladder cancer associated protein	0.23	1.38	0.66	0.21	0.83	0.35	0.38	0	NM_006698	0	0.24	0.13	0	0.11	0.1	0	0	NM_016916
BLMH	bleomycin hydrolase	0	0	0.22	0.63	0	0	0.38	0	NM_000386	0.19	0.24	0.4	0.35	0.23	0.29	1.21	0.14	NM_178645
BLNK	B-cell linker	0	0	0	0.21	0.21	0.17	0.38	0.15	NM_013314	0	0	0	0.35	0.23	0.78	2.82	0.99	NM_008528
BLOC1S1	biogenesis of lysosome-related organelles complex-1, subunit 1	0.46	2.76	1.53	1.68	0.83	1.73	1.33	2.71	NM_001487	0.19	0.95	1.06	1.16	1.6	0.78	1.48	1.28	NM_015740
BLVRA	biliverdin reductase A	0	0	0	0	0.41	0	0.19	0	NM_000712	0	1.19	0.53	0.12	0	0	0	0	NM_026678
BLVRB	biliverdin reductase B (flavin reductase (NADPH))	0	0.46	0.22	0.63	0	1.04	0.76	0.6	NM_000713	0	0.24	0.27	0.12	0	0.29	0.81	0.14	NM_144923
BMI1	Bmi1 polycomb ring finger oncogene	0	0	0	0	0	0.17	0.19	0	NM_005180	0	0.24	0	0.23	0	0	0.27	0	NM_007552
BMP2	bone morphogenetic protein 2	0.46	0.23	0.22	0	0	0	0	0.15	NM_001200	0	0	0	0	0.11	0.1	0.27	0	AK140220
BMP2K	BMP2 inducible kinase	0	0	0.44	0	0.21	0	0	0	NM_198892	0	0	0	0	0.11	0	0.27	0	AK132786
BMPR2	bone morphogenetic protein receptor, type II (serine/threonine kinase)	0.46	0.46	0	0.42	0	0.17	0.19	0.15	NM_001204	0	0	0	0	0	0	0	0	NM_007561
BMS1	BMS1 homolog, ribosome assembly protein (yeast)	0	0.23	0	0	0.41	0	0.38	0.3	NM_014753	0.37	0	0.13	0	0.11	0.1	0.27	0.14	NM_194339
BNIP1	BCL2/adenovirus E1B interacting protein 1, NIP1	0.23	0.23	0.22	0	0.62	0.69	0.57	0.45	NM_001205	0.75	0.12	0	0.23	0	0	0.27	0.28	NM_172149
BNIP3	BCL2/adenovirus E1B 19kDa interacting protein 3, nuclear gene encoding mitochondrial protein	0.23	1.15	0.87	0.21	0.41	0.35	0.38	0	NM_004052	0	0	0	0	0	0	0	0	NM_009760
BNIPL	BCL2/adenovirus E1B 19kD interacting protein like	0.46	0	0.22	0	0	0	0.19	0.3	NM_138278	0	0	0	0	0	0	0	0	NM_134253
BOK	Bcl-2-related ovarian killer protein	0.46	0	1.09	0	0	0	0	0	NM_032515	0.75	0	0.53	0	0.11	0	0.67	1.13	NM_016778
BOLA1	bolA-like 1 (E. coli)	0.23	0	0	0.21	0.62	0.35	0	0.15	NM_016074	0.37	0.95	1.06	0.23	0.91	0.98	0.67	0.71	NM_026975
BOLA3	bolA-like 3 (E. coli)	0	0.46	0.44	0.42	0	0.17	0.38	0	NM_212552	0.56	0.84	0.27	1.05	0.23	0.1	0	0.57	NM_175277
BOP1	block of proliferation 1	0	0	0	0	0	0	0	0	NM_015201	0	0.12	0.13	0	0.11	0	0.54	0.43	NM_013481
BPGM	2,3-bisphosphoglycerate mutase	0	0	0	0	0	0	0.19	0	NM_001724	0.56	0	0	0	0.11	0	0.27	0	NM_007563
BPIL3	bactericidal/permeability-increasing protein-like 3	0.69	2.3	0	4	0.41	2.94	3.8	1.51	NM_174897	0	0	0	0	0	0	0	0	NM_199303
BPNT1	3'(2'), 5'-bisphosphate nucleotidase 1	0	0.46	0	0	0	0	0.19	0.15	NM_006085	0	0	0.13	0	0	0	0	0.14	NM_011794
BRD1	bromodomain containing 1	0.69	0	0.22	0	0.21	0	0.38	0	NM_014577	0	0	0	0	0	0	0	0	NM_001033274
BRD2	bromodomain containing 2	0.46	0.23	0.22	0.21	0.41	0.35	0.38	0.75	NM_005104	1.12	0.48	0.27	0.81	0.11	0.39	1.48	0.57	NM_010238
BRD7	bromodomain containing 7	0.23	0	0	0	0	0	0.19	0	NM_013263	0	0.12	0.4	0.23	0	0	0.13	0	NM_012047
BRD8	bromodomain containing 8	0	0.23	0	0.21	0.41	0.17	0	0.15	NM_006696	0	0	0	0.12	0	0	0.27	0.14	NM_030147
BRI3BP	Bri3 binding protein	0	0	0	0.21	0	0	0	0	NM_080626	0	0	0	0	0.23	0.69	0.13	0	NM_029752
BRMS1	breast cancer metastasis-suppressor 1	0	0.46	0.22	0.21	0.21	0.35	0	0.15	NM_015399	0	0.24	0.13	0.12	0.23	0	0.13	0.43	NM_134155
BRMS1L	breast cancer metastasis-suppressor 1-like	0.69	0	0	0	0.41	0	0	0	NM_032352	1.12	0	0.27	0.23	0.34	0	0.67	0.99	NM_001037756
BRP44	brain protein 44	0.46	0	0.66	0.42	2.27	1.04	0.38	0.6	NM_015415	4.49	4.89	7.57	4.19	4.9	2.25	3.9	1.7	NM_027430
BRWD2	Bromodomain and WD repeat domain containing 2	0	0.46	0.22	0	0	0	0	0	AL137699	0	0.24	0.27	0	0	0	0	0.14	NM_172255
BSCL2	Bernardinelli-Seip congenital lipodystrophy 2 homolog (human)	0.23	0.92	0.44	0.42	0.62	0.87	0.38	0.3	NM_032667	2.99	0.36	0.13	1.05	1.6	0.2	0.81	1.7	NM_008144
BSDC1	BSD domain containing 1	0.23	0	0.22	0.21	0.21	0.35	0	0.15	NM_018045	0.93	0.72	0.27	0.47	0.23	0.29	0.67	1.13	NM_133889
BSND	Bartter syndrome, infantile, with sensorineural deafness (Barttin)	0	0	0	0	0	0	0	0	NM_057576	0	0	0	1.05	0.34	0.59	0.27	0.14	NM_080458
BSPRY	B-box and SPRY domain containing	0	0	0	0	0.21	0	0	0.15	NM_017688	0	0.12	0	0	0	0	0.27	0.28	NM_138653
BST2	bone marrow stromal cell antigen 2	1.15	0.23	0	0	0	0.52	0	0	NM_004335	0	0	0.13	0	0.11	0.2	0.67	0	NM_198095
BTAF1	BTAF1 RNA polymerase II, B-TFIID transcription factor-associated, 170kDa (Mot1 homolog, S. cerevisiae)	0.46	0	0	0	0	0.17	0.19	0	NM_003972	0	0	0.13	0	0.11	0.2	0.67	0	NM_198095
BTBD14B	BTB (POZ) domain containing 14B	0	0	0.22	0	0	0	0.38	0	NM_052876	0.19	0	0.13	0.23	0.11	0	0.13	0.14	NM_025788
BTBD6	BTB (POZ) domain containing 6	0	0.46	0	0	0	0	0.38	0.15	NM_033271	0	0.12	0	0.12	0	0.2	0.27	0.57	NM_201646
BTC	betacellulin, epidermal growth factor family member	0	0	0	0	0	0	0	0	NM_001729	0	0	0	0	0	0	1.08	1.56	NM_007568
BTD	biotinidase	0	0.23	0	0	0	0	0	0.3	NM_000060	0	0.36	0.66	0.12	0.23	0.49	0.13	0	NM_025295
BTF3	basic transcription factor 3	0	0	0.22	0	0	0	0.38	0.15	NM_001037637	1.5	1.91	1.99	1.74	1.37	0.88	0.67	1.7	NM_145455
BTG1	B-cell translocation gene 1, anti-proliferative	0.23	0.46	0.44	0.42	1.45	0.52	0.76	0.9	NM_001731	5.05	0.12	0	1.28	1.48	5.09	5.51	2.84	NM_007569
BTG2	BTG family, member 2	0.92	0.23	0.22	1.26	0.41	1.04	10.45	7.99	NM_006763	0	0	0	0	0	0	0	0	NM_007570
BTG3	BTG family, member 3	0.46	0.46	0	0.21	0	0.17	0.38	0.9	NM_006806	4.49	0.12	0.13	0	0	0.39	0.54	0	NM_009770
BUB3	budding uninhibited by benzimidazoles 3 homolog (S. cerevisiae)	0	0	0.22	0.42	0	0.35	0.19	0.15	NM_004725	0.37	0.12	0	0.58	0.34	0	0.4	0.85	NM_009774
BUD13	BUD13 homolog (yeast)	0	0	0.22	0	0	0	0	0	NM_032725	0	0	0	0.12	0.11	0	0.4	0.14	NM_146000
BUD31	BUD31 homolog (yeast)	1.15	0.23	0	0	0	0.69	0.19	1.05	NM_003910	0.19	1.43	0.53	0.23	0.34	0.29	0.27	0.71	NM_001008705
BZW1	basic leucine zipper and W2 domains 1	0.46	0.46	0	0.21	0	0.35	0.38	0.9	NM_014670	0	0	0.13	0	0	0	0.13	0.28	NM_025824
C1GALT1	core 1 synthase, glycoprotein-N-acetylgalactosamine 3-beta-galactosyltransferase, 1	0	0.46	0	0	0	0	0.38	0.15	NM_020156	0	0	0	0	0	0	0	0	NM_052993
C1GALT1C1	C1GALT1-specific chaperone 1	0.69	1.38	1.97	1.26	0.62	1.38	1.9	1.66	BC012502	0	0	0	0.12	0	0	0	0.14	NM_021550
C1QL1	complement component 1, q subcomponent-like 1	0.92	0	0	0	0.21	0	0	0	NM_006688	0	0	0	0	0	0	0	0.14	NM_011795
C1QTNF2	C1q and tumor necrosis factor related protein 2	1.38	3.45	0.66	0.63	0.83	1.21	0.19	3.16	NM_031908	0	0	0	0	0	0	0	0	NM_026979
C1QTNF3	C1q and tumor necrosis factor related protein 3	0	0.23	0	0	0	0	0.19	0	NM_030945	0	0.36	1.99	0.12	0	0	0	0	NM_030888
C1QTNF4	C1q and tumor necrosis factor related protein 4	0	0	0	0	0	0	0	0	NM_031909	0	0.12	0	0.58	0.91	1.08	0.67	0.43	NM_026161
C1QTNF6	C1q and tumor necrosis factor related protein 6	0.23	0.23	0.22	0.21	0	0.35	0	0.15	NM_031910	0	0	0	0.12	0	0	0.4	0	BC071187
C1R	complement component 1, r subcomponent	3.21	0	0.66	0	0	0	0.38	0	NM_001733	0	0	0.13	0	0	0.1	0	0.14	NM_023143
CAB39	calcium binding protein 39	0	0.23	0.22	0.21	0	0.17	0.38	0.15	NM_016289	0	0	0	0	0	0	0	0	NM_133781
CAB39L	calcium binding protein 39-like	0	0	0.44	0.21	0	0.17	0.19	0	NM_030925	0	0.24	0.13	0.12	0.23	0.39	0.27	1.13	NM_026908
CABIN1	calcineurin binding protein 1	0	0	0.44	0.21	0	17	0.19	0	NM_012295	0	0.24	0	0	0.46	0	0.4	0	NM_172549
CADM4	cell adhesion molecule 4	0	0	0	0	0	0	0.19	0	NM_145296	0.93	0	0	0.12	0.34	0.2	0.27	0.14	NM_153112
CALB1	calbindin-28K	0	0	0.66	0	0	1.04	0.38	0.15	NM_004929	0.19	0	0	0	0	1.76	0.13	0	NM_009788
CALB1	Calbindin-28K	0	0	0.66	0	0	1.04	0.38	0.15	NM_004929	0	0	0	0	0.11	1.37	0.4	0	AK038856
CALCOCO1	calcium binding and coiled coil domain 1	0.46	0	0	0	0	0.35	0.19	0.15	NM_020898	1.31	0	0	0.12	0.46	0.2	0	0.57	NM_026192
CALCOCO2	calcium binding and coiled-coil domain 2	0.46	0	0.22	0	0	0	0	0	NM_005831	0	0	0	0	0	0	0	0	NM_029755
CALM1	calmodulin 1 (phosphorylase kinase, delta)	0.46	0	0.22	0	0.21	0.35	0	0.3	NM_006888	0.19	0	0.13	0.12	0	0.29	0.13	0	NM_009790
CALM2	calmodulin 2	7.11	0.69	1.75	1.68	1.86	2.08	2.47	2.26	NM_001743	2.62	0.72	0.13	1.63	1.25	0.78	1.34	2.41	NM_007589
CALM3	calmodulin 3	1.38	0.69	0.22	0	0.41	0.69	0.95	0.75	NM_005184	0	0.36	0.4	0	0.34	0.1	0.67	1.13	NM_007590
CALML4	calmodulin-like 4	0	0	0	0	0	0	0	0	NM_033429	2.06	28.27	33.59	0.23	0.57	0.2	0.67	0.28	NM_138304
CALR	calreticulin	0.23	0.23	0.22	0.42	0.21	0.17	0	0.3	NM_004343	0.75	0.84	1.06	0.47	0.91	0.1	0.94	0.43	NM_007591
CALU	calumenin	0.46	0	0	0	0	0	0	0	NM_001219	0.19	0	0.27	0.12	0.23	0	0.13	0.28	NM_184053
CAMK1	calcium/calmodulin-dependent protein kinase I	0	0	0.22	0.21	0	0.17	0.57	0	NM_003656	1.68	0.48	0.27	0	0.11	0	0.67	0.71	NM_133926
CAMK1	Calcium/calmodulin-dependent protein kinase I	0	0	0.22	0.21	0	0.17	0.57	0	NM_003656	0.19	0.84	0	0.12	0.23	0	0.54	0.43	BC042494
CAMK2N1	calcium/calmodulin-dependent protein kinase II inhibitor 1	0	0.69	0.22	0.21	0	0	0.57	1.36	NM_018584	0.56	0	0	0.23	0.11	2.35	2.02	0.57	NM_025451
CAMKK2	Calcium/calmodulin-dependent protein kinase kinase 2, beta	0	0.46	0	0	0	0	0	0	NM_006549	0	0.24	0	0	0	0.1	1.34	0.99	CB205044
CAMSAP1L1	calmodulin regulated spectrin-associated protein 1-like 1	0	0	0	0.21	0	0	0	0	NM_203459	0.93	0.12	0	0.23	0.11	0	0.67	0	NM_001081360
CAMTA1	calmodulin binding transcription activator 1	0.23	0.23	0	0.21	0	0	0	0.45	NM_015215	0	0	0	0	0	0.1	0	0	NM_001081558
CAMTA2	calmodulin binding transcription activator 2	0	0	0	0.21	0	0	0	0	NM_015099	2.06	0.36	0.13	0.35	0.8	2.45	1.61	0.71	NM_178116
CAND2	cullin-associated and neddylation-dissociated 2 (putative)	0.23	0	0	0.21	0	0	0.19	0.3	NM_012298	0	0	0	0	0	0	0	0	NM_025958
CANT1	calcium activated nucleotidase 1	0	0.23	0.66	0.21	0.21	0.17	0	0.3	NM_138793	0.37	0	0.13	0	0	0	0	0.28	NM_029502
CANX	calnexin	0	0	0	0	0	0	0	0	NM_001746	1.31	0.95	1.06	1.4	0.91	0.39	1.61	2.13	NM_007597
CAP1	CAP, adenylate cyclase-associated protein 1 (yeast)	1.84	0.69	0.87	0	0.62	0.87	0.76	1.21	NM_006367	0	0.12	0.27	0.47	0.46	0.1	0.27	1.56	NM_007598
CAPN1	calpain 1, (mu/I) large subunit	0.46	0	0.22	0.21	0.21	0.17	0.19	0.45	NM_005186	0.19	0	0	0.12	0.11	0.2	0.54	0.71	NM_007600
CAPN2	calpain 2, (m/II) large subunit	8.03	0.46	0.87	1.89	3.51	3.29	2.28	1.36	NM_001748	0	0.48	0	0.81	0.34	0	0.13	0.14	NM_009794
CAPN5	calpain 5	0	0	0	0.21	0	0	0	0.3	NM_004055	0.19	0.12	0	0	0.46	0	0.54	0.14	NM_007602
CAPN7	calpain 7	0	0	0	0	0.21	0	0	0	NM_014296	0	0.95	0.4	0.12	0	0	0	0.14	NM_009796
CAPNS1	Calpain, small subunit 1	0.46	0.69	0	0.63	0.41	0.52	0.38	1.05	CR612316	2.43	0.24	0.66	1.4	1.03	0.2	1.34	1.13	NM_009795
CAPRIN1	cell cycle associated protein 1, transcript variant 2	0.46	0	0	0	0	0	0	0	NM_203364	0.19	0	0	0.47	0.34	0.1	0.54	0.99	NM_016739
CAPRIN2	caprin family member 2	0	0	0	0	0	0	0	0	NM_001002259	0.93	0	0	0.12	0	0	0.27	0.14	NM_181541
CAPZA2	capping protein (actin filament) muscle Z-line, alpha 2	0.69	0.23	0.44	0.21	0.41	0.69	0.57	0	NM_006136	0.19	0	0.66	0.12	0.8	0	0.67	0.85	NM_007604
CAPZB	capping protein (actin filament) muscle Z-line, beta	0	0	0.44	0.63	0.21	0.35	0.19	1.36	NM_004930	0	0	0	0.23	0.23	0.2	0.4	0.28	NM_009798
CAR12	carbonic anyhydrase 12	0	0.23	0.44	2.31	2.89	4.15	2.85	0.15	NM_001218	0.37	0.12	0	0.12	0	0.1	3.76	2.69	NM_178396
CAR2	carbonic anhydrase 2	0	0.92	0.66	0.21	0	2.94	3.99	3.31	NM_000067	0.93	1.91	0	0.81	0.23	0.39	1.21	6.38	NM_009801
CAR4	carbonic anhydrase 4	0	0.23	0.22	0	0.62	0.17	0	0	NM_000717	0.75	11.57	3.19	5.35	2.39	0.29	0	0	NM_007607
CARD10	caspase recruitment domain family, member 10	0.46	0	0	0.21	0	0.17	0	0.15	NM_014550	0.37	0.48	0	0.12	0	0.1	0.54	0	NM_130859
CARD11	caspase recruitment domain family, member 11	0	0.46	0	0	0	0	0	0.45	NM_032415	0	0	0	0	0	0	0	0	NM_175362
CARD6	caspase recruitment domain family, member 6	0.23	0.23	0.44	0.21	0.41	0	0.19	0	NM_032587	0	0	0	0	0	0	0	0	XM_139295
CARKL	carbohydrate kinase-like	0	0	0	0	0.21	0	0	0	NM_013276	0	0.36	0	0.12	0.34	0.2	0.27	0	NM_029031
CARM1	coactivator-associated arginine methyltransferase 1	0	0.69	0.22	0.21	0.21	0	0.19	0.6	NM_199141	0	0.24	0	0.35	0.23	0.1	0.13	0.43	NM_021531
CARS2	cysteinyl-tRNA synthetase 2, mitochondrial (putative)	0.46	0	0.22	0.42	1.86	0.17	0.76	0.6	NM_024537	0	0	0.13	0	0.68	0.1	0.4	0.28	XM_001474115
CASC3	cancer susceptibility candidate 3	1.15	0.92	0.44	1.26	1.24	1.38	0.38	0.6	NM_007359	0.19	0.24	0.4	0.12	0.34	0.2	0.4	0.85	NM_138660
CASK	Calcium/calmodulin-dependent serine protein kinase (MAGUK family)	0	0	0	0.21	0	0	0.38	0	AB208859	0	0	0	0	0	0	0	0	NM_009606
CASKIN2	CASK interacting protein 2	0.46	0	0	0.21	0	0.35	0.19	0	NM_020753	0	0.12	0	0.58	0.34	0.2	0.27	0.28	NM_080643
CASP3	Caspase 3	0	0	0	0	0	0	0.19	0.15	NM_004346	0	0	0	0	0	0.29	0.54	0	AK146226
CATSPER4	channel, sperm associated 4	0	0	0	0	0	0	0	0	NM_198137	0	0	0	0	0	0	0.27	0	NM_177866
CAV1	caveolin, caveolae protein 1	0	0	0	0	0	0	0	0	NM_001753	0.37	0	0	0.12	0	0.2	2.02	0.28	NM_007616
CBLB	Cas-Br-M (murine) ecotropic retroviral transforming sequence b	0.46	0	0.44	0.21	0	0.35	0	0.15	NM_170662	0	0	0	0	0	0	0	0	NM_001033238
CBR1	carbonyl reductase 1	0	0	0	1.05	0.41	0.69	0.38	0.9	NM_001757	0.37	0	0.13	0.58	1.14	0.69	1.34	0.85	NM_007620
CBS	cystathionine-beta-synthase	0	0.69	0	0	0	0	0	0	NM_000071	0	2.86	6.77	0.7	0.57	0.1	0.27	0	NM_144855
CBX1	chromobox homolog 1 (HP1 beta homolog Drosophila )	0.23	0	0	0.21	0.62	0.35	0.38	0.3	NM_006807	0.56	0	0.13	0.12	0	0.1	0.13	0	NM_007622
CBX3	chromobox homolog 3 (Drosophila HP1 gamma)	0.23	0.23	0.44	0	0.21	0.35	0.19	0.45	NM_007276	0.19	0.72	0.13	0.12	0.57	0.29	0.27	0.14	NM_007624
CBX4	chromobox homolog 4 (Pc class homolog, Drosophila)	0.23	0	0	0.63	0	0	0	0.45	NM_003655	0	0	0	0.12	0.11	0	0.13	0	NM_007625
CBX6	chromobox homolog 6	0	0	0	0	0.21	0	0	0.3	NM_014292	0	0	0.13	0.47	0.46	0.39	0.81	0.14	NM_028763
CBY1	chibby homolog 1 (Drosophila)	0.46	0	0.22	0.42	0	0.17	0.19	0.3	NM_015373	0	0	0	0.12	0.23	0.1	0.27	0.28	NM_028634
CC2D1A	coiled-coil and C2 domain containing 1A	0	0	0.22	0.21	0.21	0	0.19	0.15	NM_017721	0.37	0	0.27	0.23	0.34	0.2	0.54	0.57	NM_145970
CC2D1B	coiled-coil and C2 domain containing 1B	0	0	0	0	0	0	0	0.15	NM_032449	0.75	0.12	0.13	0.23	0.8	0.29	1.21	0.57	NM_177045
CCAR1	cell division cycle and apoptosis regulator 1	0.46	0	0	0.21	0	0	0.19	0	NM_018237	0	0	0	0	0	0	0.4	0	NM_026201
CCBL2	cysteine conjugate-beta lyase 2, transcript variant 3	0.92	0.23	0.22	0.63	0	0.17	0.38	0	NM_019610	0.19	0	0.53	0.12	0.57	0.2	0.13	0.14	NM_173763
CCDC101	coiled-coil domain containing 101	0.23	0	0	0	0	0	0	0	NM_138414	0.19	0	0	0.12	0.34	0.1	0.4	0.57	NM_029339
CCDC104	coiled-coil domain containing 104	0.23	0	0.66	0.21	0.41	0	0	0	NM_080667	0.56	1.07	0.8	0.7	0.23	0.29	0.27	1.56	NM_025740
CCDC106	coiled-coil domain containing 106	0	0	0.66	0.21	0.21	0	0	0	NM_013301	0	0	0	0	0.11	0	0.4	0	NM_146178
CCDC114	coiled-coil domain containing 114	1.61	5.74	12.68	2.1	0.83	4.85	1.33	2.56	NM_144577	0	0	0	0	0.23	0	0	0	NM_001033243
CCDC115	coiled-coil domain containing 115	1.38	0.46	0.22	0.21	0.41	0.17	0.76	0.6	NM_032357	0	0.35	0.13	0.23	0.46	0.1	0.13	0	NM_027159
CCDC12	coiled-coil domain containing 12	0	0	0.22	0.21	0.41	0	0.19	0.3	NM_144716	0	0.36	0.4	0.58	0.23	0.1	0	0.85	NM_028312
CCDC124	coiled-coil domain containing 124	0	0	0	0	0	0	0	0.15	NM_138442	0.93	0.84	0.53	0.58	1.37	0.29	0.81	0.71	NM_026964
CCDC128	Coiled-coil domain containing 128	0.23	0.46	0.22	0.42	0	0.69	0.19	0.15	AK122900	0	0.12	0.13	0.23	0.23	0.29	0.13	0.14	NM_028658
CCDC132	coiled-coil domain containing 132, transcript variant 1	0	0.46	0	0	0.21	0.17	0.57	0.3	NM_017667	0	0.24	0.27	0.12	0	0.1	0	0	NM_024260
CCDC19	coiled-coil domain containing 19	0.69	0.23	0	0.21	0	0	0	0	NM_012337	0	0	0	0	0	0	0	0	AK161456
CCDC25	coiled-coil domain containing 25	0.23	0.23	0.22	0	0.41	0.35	0.19	0	NM_018246	0.37	0	0.13	0.12	0.23	0	0.4	0.28	NM_145944
CCDC28A	coiled-coil domain containing 28A	0	0.23	0.22	0.42	0.62	0.52	0.38	0.45	NM_015439	0	0	0	0	0	0	0	0	NM_144820
CCDC33	Coiled-coil domain containing 33	0.69	0	0.87	0.84	1.03	0.52	0.19	0.9	AK125799	0	0	0	0	0	0	0	0	NM_029212
CCDC34	coiled-coil domain containing 34	0	0	0	0	0	0	0	0.3	NM_030771	0	0.36	0	0	0.11	0	0.13	0.14	NM_026613
CCDC47	coiled-coil domain containing 47	0	0	0	0.21	0.62	0.35	0.19	0.15	NM_020198	0	0	0	0.58	0	0	0	0	NM_026009
CCDC53	coiled-coil domain containing 53	0.69	0.23	0.22	0	0.21	0.35	0.19	0.45	NM_016053	0	0	0	0	0	0	0	0	NM8026070
CCDC56	coiled-coil domain containing 56	0.69	1.15	0.22	0.63	0.83	0.69	0.76	0.9	NM_001040431	1.5	0.24	0	0.12	0.57	0	0.4	0.85	NM_026618
CCDC57	coiled-coil domain containing 57	0	0.23	0	0.21	0.41	0	0.19	0.3	NM_198082	0	0	0	0	0	0	0	0	NM_027745
CCDC59	coiled-coil domain containing 59	0.46	0	0	1.05	0	0	0.19	0.3	NM_014167	0.19	0.36	0	0.12	0.23	0	0.27	0.57	NM_025602
CCDC6	Coiled-coil domain containing 6	0	0	0	0	0	0	0	0	NM_005436	0.37	1.19	1.33	0	0.23	0	0	0.14	XM_618775
CCDC64	coiled-coil domain containing 64	0.23	0.46	0.87	0.21	0.62	0	0.19	0	NM_207311	0	0	0.53	0.58	0.91	0.2	0	0.57	BC024804
CCDC76	coiled-coil domain containing 76	0.23	0	0	0.21	0	0	0.38	0	NM_019083	0	0	0	0	0	0	0	0	NM_030016
CCDC84	coiled-coil domain containing 84	0.69	0	0.22	0	0	0	0	0.15	NM_198489	0.75	0	0.27	0.23	0.46	0.1	0.4	0.28	NM_201372
CCDC86	coiled-coil domain containing 86	0	0	0	0	0.41	0.17	0.19	0.15	NM_024098	0.37	0	0.13	0	0.11	0.29	0.13	0.28	NM_023731
CCDC9	coiled-coil domain containing 9	0.23	0	0	0	0	0	0	0	NM_015603	0	0.12	0	0.23	0.11	0.39	0.54	0.28	NM_172297
CCDC90A	coiled-coil domain containing 90A	0.23	0.46	0.44	0	0	0	0	0	NM_001031713	0	0.24	0	0	0	0	0	0	NM_001081059
CCDC90B	coiled-coil domain containing 90B	0.46	0	0	0.21	0	0	0.19	0.15	NM_021825	0	0	0	0.12	0	0	0.13	0	NM_025515
CCDC92	coiled-coil domain containing 92	0.46	0.23	0.22	0.42	0	0.35	0.38	0.15	NM_025140	0	0	0	0	0	0	0	0.14	NM_144819
CCDC95	coiled-coil domain containing 95	0	0	0	0.21	0.21	0	0	0	NM_173618	0.19	0	0.13	0.23	0.57	0.29	0.67	0.85	NM_153580
CCDC97	coiled-coil domain containing 97	0	0	0	0	0	0	0	0	NM_052848	1.5	0.84	0.66	0	0.11	0.2	0.13	0.14	NM_028771
CCDC98	coiled-coil domain containing 98	0.69	0	0.22	0	0	0.17	0	0.15	NM_139076	0	0	0	0	0	0	0	0	NM_172405
CCHCR1	coiled-coil alpha-helical rod protein 1	0	0	0.66	0.42	0	0	0	0.15	NM_019052	0.19	0.12	0	0.12	0.91	0	0.4	0	NM_146248
CCKAR	cholecystokinin A receptor	0	0.44	0	0	0	0	0	0	NM_000730	0.19	0	0.4	0	0	0	0	0	NM_009827
CCND1	cyclin D1	0.69	0	0.22	0.84	0.41	0.35	0.57	0.3	NM_053056	0	0.36	0	1.51	1.03	0.2	0.27	1.13	NM_007631
CCND1	Cyclin D1	0.69	0	0.22	0.84	0.41	0.35	0.57	0.3	NM_053056	0	0.36	0	1.28	0.11	0.1	0.13	0.43	BI079416
CCND3	cyclin D3	0.92	0.46	0	0.21	1.03	0.17	0	0.15	NM_001760	2.43	0.6	0.53	1.4	3.08	1.86	2.69	2.98	NM_007632
CCNDBP1	cyclin D-type binding-protein 1	0	0	0.44	0	0.41	0.17	0.38	0.3	NM_012142	0	0.24	0.13	0.23	0.11	0.1	0.27	0.57	NM_010761
CCNG2	cyclin G2	0	0.23	0	0.63	1.03	0.35	0.76	0.45	NM_004354	0	0	0	0.23	0	0	0.13	0.28	NM_007635
CCNI	cyclin I	1.15	0.46	0.22	0.42	0.41	0.52	0.38	0.15	NM_006835	0.19	0.12	0	0.47	0.8	0	0.13	0.71	NM_017367
CCNL1	cyclin L1	0	0	0	0.21	0.83	0.17	0.19	0.3	NM_020307	0	0	0	0.12	0	0.29	0.81	0.14	NM_019937
CCNL2	cyclin L2	0.46	0.69	1.09	0	0	0	0.57	0.75	NM_030937	0	0.72	0.4	0.58	1.03	0.2	1.34	0.57	NM_207678
CCNT1	cyclin T1	0.46	0	0	0	0.21	0	0	0	NM_001240	0	0	0	0	0	0	0	0	NM_009833
CCPG1	cell cycle progression 1	0.23	0	0	0.21	0.41	0	0.38	0	NM_004748	0	0	0	0.35	0.23	0.1	0.13	0.43	NM_028181
CCS	copper chaperone for superoxide dismutase	0.23	1.15	0.66	0	0.21	0.35	0.57	0.45	NM_005125	0	0.95	0.53	0.35	1.25	0.49	1.61	0.28	NM_016892
CCT2	chaperonin containing TCP1, subunit 2 (beta)	0.46	0.92	0.22	0.42	1.24	0.35	0.95	0.9	NM_006431	1.5	0.36	1.06	1.63	1.6	0.59	1.21	1.7	NM_007636
CCT3	chaperonin subunit 3 (gamma)	0.92	1.84	2.19	1.05	2.68	0.69	1.52	1.81	NM_005998	5.23	3.7	1.73	4.42	5.01	3.72	5.11	3.26	NM_009836
CCT4	chaperonin subunit 4 (delta)	0	0.23	0	0	0.21	0	0	0	NM_006430	0.37	0.24	0.53	0.35	0.11	0.49	0.54	0	NM_009837
CCT5	chaperonin subunit 5 (epsilon)	0.23	0	0	0	0	0	0	0	NM_012073	0.75	1.19	0.66	0.12	0.91	0.29	0.81	0.99	NM_007637
CCT6A	chaperonin subunit 6a (zeta)	0	0.23	0	0	0.21	0.17	0.19	0	NM_001762	1.12	1.31	1.33	0.7	0.46	0.2	0.27	0.28	NM_009838
CCT7	chaperonin subunit 7 (eta)	0.69	0.92	0.87	0.63	0.21	0.17	0.57	0.45	NM_006429	1.87	0.84	2.12	1.4	2.39	1.96	2.42	1.84	NM_007638
CCT8	chaperonin containing TCP1, subunit 8 (theta)	0.46	0	0.22	0	0.21	0	0	0.3	NM_006585	0.37	1.07	1.86	0.7	0.57	0.59	0.4	0.28	NM_009840
CD14	CD14 antigen	0	0	0.22	0	0	0	0.19	0	NM_000591	0	0.12	0	0.23	0	0	0	0.71	NM_009841
CD164	CD164 antigen	1.61	0.69	2.41	0.21	1.65	0.87	0.95	1.05	NM_006016	0.37	1.43	1.19	1.4	0.68	0.2	0.67	0.71	NM_016898
CD2AP	CD2-associated protein	0.92	0.46	0.44	0	0.21	0.17	0	0.15	NM_012120	0.56	0.48	0.13	0.35	0.8	0.2	1.08	1.56	NM_009847
CD2BP2	CD2 antigen (cytoplasmic tail) binding protein 2	0.23	0	0	0.21	0	0	0.19	0.15	NM_006110	0.75	0.36	0.4	0.47	0.57	0.29	0.67	0.85	NM_027353
CD320	CD302 antigen	0.23	0.69	0.44	1.05	0.21	0	0.19	0.3	NM_016579	0	0.84	0.66	0	0.11	0	0	0	NM_025422
CD36	CD36 antigen	0	0	0	0	0	0	0	0	NM_001001548	0	0.95	1.99	0.12	0	0	0.13	0	NM_007643
CD79B	CD79B antigen	0	0	0	0	0	0	0	0	NM_000626	0	0	0	0	0.11	0	0	1.56	NM_008339
CD81	CD81 molecule	2.98	0	0.66	2.95	1.45	2.42	3.04	1.66	NM_004356	4.67	1.91	2.26	8.14	6.38	4.8	5.51	8.79	NM_133655
CDADC1	cytidine and dCMP deaminase domain containing 1	0	0	0.22	0	0	0	0	0.15	NM_030911	0.56	0	0.13	0.47	0.11	0.29	0.81	0	NM_027986
CDC123	cell division cycle 123 homolog (S. cerevisiae)	0.69	0.69	0.44	0.42	0.21	0.35	0.19	0.6	NM_006023	0	0	0	0	0.11	0	0	0	NM_133837
CDC14A	CDC14 cell division cycle 14 homolog A (S. cerevisiae), transcript variant 1	0.69	0.23	0	0	0	0.17	0	0	NM_003672	0	0	0	0	0.11	0	0.27	0	NM_001080818
CDC26	cell division cycle 26	0.69	0.23	0	0	0.83	0.17	0.38	0.15	NM_139286	0.19	0	0	0.12	0.34	1.86	1.08	0.43	NM_139291
CDC34	cell division cycle 34 homolog (S. cerevisiae)	0.23	0.22	0	0	0	0.17	0.19	0	NM_004359	0.56	0.24	0.4	0.23	0.46	0.1	0.27	0.28	NM_177613
CDC37	cell division cycle 37 homolog (S. cerevisiae)	1.38	0.69	0.87	0.21	0	1.04	0.57	1.66	NM_007065	1.68	0.24	0.27	0.35	0	0.2	0.27	0	NM_016742
CDC40	Cell division cycle 40 homolog (yeast)	0.23	0	0	0.21	0	0.17	0	0.15	NM_015891	0	0.84	0	0	0.34	0.1	0.27	0.28	XM_483893
CDC42BPB	CDC42 binding protein kinase beta (DMPK-like)	0.2	0.23	0.87	0	1.24	0.52	0.76	0.15	NM_006035	0	0	0.13	0	0.11	1.08	1.48	0.71	NM_183016
CDC42EP1	CDC42 effector protein (Rho GTPase binding) 1	0	0	0.22	0	0	0.17	19	0.15	NM_152243	0.19	0.12	0.27	0	0.57	1.86	2.55	0.85	BC016250
CDC42EP2	CDC42 effector protein (Rho GTPase binding) 2	0	0	0	0	0	0	0	0.45	NM_006779	0	0	0	0	0.34	0.29	0.4	0.28	NM_026772
CDC42EP4	CDC42 effector protein (Rho GTPase binding) 4	0.46	0	0	0	0	0	0.19	0	NM_012121	0.56	0	0	0	0	0	0.13	0.57	NM_020006
CDC42SE2	CDC42 small effector 2	0	0	0.22	0	0	0.35	0	0	NM_020240	4.49	0.48	0	0.23	0.57	0.1	1.75	0.14	NM_178626
CDC5L	cell division cycle 5-like (S. pombe)	0.23	0	0	0	0	0	0	0	NM_001253	0	0.12	0.13	0	0	0	0.27	0.43	NM_152810
CDCA7L	cell division cycle associated 7 like	0.23	0	0	0	0.41	0.17	0	0	NM_018719	0	0	0	0	0.11	0.88	0	0	NM_146040
CDH1	cadherin 1	0	0	0	0.42	0	0	0	0.15	NM_004360	0.37	0	0.4	2.79	3.42	2.45	8.33	5.53	NM_009864
CDH16	cadherin 16, KSP-cadherin	0	0.92	0.22	1.47	1.24	1.73	3.99	3.01	NM_004062	5.05	1.79	1.33	8.96	21.42	21.06	55.52	59.13	NM_007663
CDIPT	CDP-diacylglycerol--inositol 3-phosphatidyltransferase (phosphatidylinositol synthase)	0.46	0.23	0.22	0.21	0.62	0.17	0	0.45	NM_006319	0.56	0.72	0.4	1.05	0.46	0.59	2.96	1.28	NM_138754
CDK2AP1	CDK2-associated protein 1	0.69	0	0.22	0.42	0.62	0.35	1.14	1.96	NM_004642	0	0.48	0.53	0.58	0.34	0.29	0.27	0.28	NM_013812
CDK2AP2	CDK2-associated protein 2	0.23	0	0	1.89	1.03	0.87	1.14	2.26	NM_005851	0.56	0.84	0.13	0.58	0.11	0.29	0.94	0.85	NM_026373
CDK5	cyclin-dependent kinase 5	0	0	0.22	0	0	0	0.38	0	NM_004935	0.75	0	0	0	0	0	0.13	0	NM_007668
CDK5RAP2	CDK5 regulatory subunit associated protein 2	0.23	0.23	0	0.21	0.21	0.17	0	0.3	NM_018249	0.19	0	0	0	0	0	0.54	0	NM_145990
CDK5RAP3	CDK5 regulatory subunit associated protein 3	0.23	0.23	0.87	0.21	1.24	0.52	0.76	0.9	NM_176096	0.19	0.12	0	0.23	0.11	0.1	0.27	0.28	NM_030248
CDK7	cyclin-dependent kinase 7 (MO15 homolog, Xenopus laevis, cdk-activating kinase)	0.23	0	0.22	0	0	0.17	0.38	0	NM_001799	0.37	0.12	0	0	0	0.1	0.27	0	NM_009874
CDK9	cyclin-dependent kinase 9 (CDC2-related kinase)	0.23	0	0.22	0.63	0.41	0	0.19	0	NM_001261	0.37	0.12	0.27	0.35	0.46	0.39	0	0.28	NM_130860
CDKL1	cyclin-dependent kinase-like 1 (CDC2-related kinase)	0	0	0	0	0	0	0	0	NM_004196	0	0	0	0.35	0.46	0.1	0.67	0.28	NM_183294
CDKN1B	cyclin-dependent kinase inhibitor 1B (p27, Kip1)	0.69	0.23	0	0.21	0	0	0.38	0.15	NM_004064	0	0	0	0	0	0	0	0	NM_009875
CDKN1C	cyclin-dependent kinase inhibitor 1C (p57, Kip2)	3.44	0.23	0	0.21	0	0.35	0.76	0.15	NM_000076	1.5	0	0	0	0	0	0	0	NM_009876
CDKN2AIP	CDKN2A interacting protein	0	0	0	0	0	0	1.71	0.45	NM_017632	0	0	0	0	0	0	0	0	NM_172407
CDO1	cysteine dioxygenase 1, cytosolic	0	0	0	0	0	0	0	0	NM_001801	0	0.36	1.06	0.47	0	0.39	1.61	0.57	NM_033037
CDR2	cerebellar degeneration-related 2	0	0.23	0.44	0	0.21	0.35	0.19	0.6	NM_001802	0	0.72	1.19	0.23	0.11	0	0	0	NM_007672
CDS2	CDP-diacylglycerol synthase (phosphatidate cytidylyltransferase) 2	0	0	0	0	0	0	0.38	0	NM_003818	0.75	0	0	0.12	0.11	0.1	0.81	0.28	NM_138651
CDT1	chromatin licensing and DNA replication factor 1	0	0	0	0	0	0	0	0	NM_030928	0	0	0.13	0	0	0.2	0.27	0.14	NM_026014
CDV3	CDV3 homolog (mouse)	0.23	0	0	0	0.21	0	0.38	0.15	NM_017548	0	0.24	0	0.58	0.68	0.2	0.13	0.43	NM_175565
CEACAM5	carcinoembryonic antigen-related cell adhesion molecule 5	0.46	0.69	0.44	0	0	0.35	0.57	0.3	NM_004363	0	0.24	0.4	0.35	0.23	0	0.27	0.28	NM_007678
CEBPB	CCAAT/enhancer binding protein (C/EBP), beta	0	0	0	0.21	0.21	0	0	0.6	NM_005194	2.8	0.12	0.4	0.23	0.34	0.98	0.67	0.28	NM_009883
CENPB	centromere protein B	0	0	0.22	0.21	0	0	0	0	NM_001810	1.87	1.91	1.86	1.51	2.16	0.59	2.02	0.57	NM_007682
CENPC1	centromere protein C 1	1.15	0.46	0.66	0	0	0.17	0.19	0.15	NM_001812	0	0	0	0	0	0	0	0	NM_007683
CENPJ	centromere protein J	0	0	0	0	0	0	0	0	NM_018451	0	0	0	0	0	0	0.27	0	NM_001014996
CENTB2	centaurin, beta 2	0.23	0	0.44	0.21	0	0.17	0.19	0.3	NM_012287	0	0.12	0	0.23	0.46	0.2	0.4	0.14	NM_030138
CENTG3	centaurin, gamma 3	0	0	0	0	0.21	0	0	0	NM_031946	1.12	0	0	0.35	0.34	0.1	0.94	0.28	NM_139153
CEP27	centrosomal protein 27kDa	0.23	0.23	0.22	0.42	0.21	0.17	0.38	0.45	NM_018097	0	0	0	0	0	0	0	0	NM_025475
CES2	carboxylesterase 2	0	1.15	0.66	0.42	0	0	0	0.15	NM_003869	0.56	1.67	2.79	0	0.34	0	0	0	NM_145603
CES3	carboxylesterase 3	0	0	0.22	0	0	0	0	0	NM_024922	0.19	7.28	2.92	0.12	0.11	0.29	1.08	0.14	NM_053200
CETN2	centrin, EF-hand protein, 2	0.46	0.46	0.22	0.42	0	0.17	0.57	0.3	NM_004344	0.37	0	0	0.12	0	0.29	0	0.14	NM_019405
CETN3	centrin 3	0.23	0	0	0	0	0.35	0	0	NM_004365	0	0.24	0	0.12	0.23	0	0.27	0.28	NM_007684
CFB	complement factor B	0.23	0	0.44	0	0.21	0	0	45	NM_001710	0	1.43	0.66	0	0.11	0.2	0	0	NM_008198
CFI	complement factor I	0.23	2.07	1.31	0.63	0.21	0.17	0	0.45	NM_000204	0	0	0	0	0	0	0	0	NM_007686
CFL1	cofilin 1 (non-muscle)	2.29	1.61	1.97	0.63	2.06	2.08	1.33	3.16	NM_005507	1.5	5.13	2.92	3.37	1.25	2.06	1.75	3.26	NM_007687
CFL2	cofilin 2, muscle	0.23	0	0.22	0	1.45	0.17	0	0.45	NM_021914	0	0.24	0	0.12	0.23	0.29	0.4	0	NM_007688
CGGBP1	CGG triplet repeat binding protein 1	0.46	0.46	0	0	0.21	0	0	0.15	NM_001008390	0	0.6	0.8	1.05	0.68	0.29	0.94	0.99	NM_178647
CGNL1	cingulin-like 1	0.23	0.23	0.44	0	1.24	0	0	0.15	NM_032866	0.56	0.12	0	1.28	1.48	0.49	0.81	1.42	NM_026599
CGREF1	Cell growth regulator with EF hand domain 1	0	0	0	0	0.21	0.17	0	0	NM_006569	0	3.82	1.86	0	0.11	0.39	0	0	XM_181420
CHCHD1	coiled-coil-helix-coiled-coil-helix domain containing 1	0.23	0	0.22	0	0	0.52	0	0.45	NM_203298	0.56	0.48	0.13	0.58	0.8	0.69	0.94	0.85	NM_025366
CHCHD2	coiled-coil-helix-coiled-coil-helix domain containing 2	1.38	1.38	1.53	2.1	3.1	2.08	2.09	1.66	NM_016139	6.35	15.03	3.58	8.26	6.38	1.86	4.7	4.4	NM_024166
CHCHD3	coiled-coil-helix-coiled-coil-helix domain containing 3	0.46	0	0	0.21	0	0.69	0.38	0.3	NM_017812	0.19	0.6	0.13	0.81	0.57	0.29	0.54	0	NM_025336
CHCHD4	coiled-coil-helix-coiled-coil-helix domain containing 4	0.23	0.23	0	0.21	0	0	0	0	NM_001098502	0.19	0.48	0.13	1.16	0.8	0.39	0.13	0.14	NM_133928
CHCHD5	coiled-coil-helix-coiled-coil-helix domain containing 5	0	0	0.44	0	0.83	0.17	0.57	1.05	NM_032309	0	0	0	0	0	0.2	0	0.28	NM_025395
CHCHD6	coiled-coil-helix-coiled-coil-helix domain containing 6	0	0	0	0	0	0	0.38	0	NM_032343	0.19	0.12	0	0.23	0	0	0	0	NM_025351
CHCHD7	coiled-coil-helix-coiled-coil-helix domain containing 7	0	0.23	0	0.21	0	0	0	0.3	NM_001011667	0.19	0.12	0	0.23	1.14	0.1	0.13	0.28	NM_181391
CHCHD8	coiled-coil-helix-coiled-coil-helix domain containing 8	0.46	0.23	0.44	0.42	1.03	0.17	0.19	0.3	NM_016565	0	0	0	0	0	0	0	0	NM_183270
CHD3	chromodomain helicase DNA binding protein 3	0	0	0	0	0.21	0	0	0.15	NM_001005273	0.37	0.24	0.13	0.23	0	0	0	0.57	NM_146019
CHD4	chromodomain helicase DNA binding protein 4	0	0.46	0.44	0	0.41	0.17	0.38	0.15	NM_001273	0.75	0.84	0.13	0.47	2.16	2.25	1.88	0.85	NM_145979
CHD8	chromodomain helicase DNA binding protein 8	0.23	0	0	0	0	0	0.38	0.15	NM_020920	0	0	0	0	0	0.1	0	0	NM_201637
CHDH	Choline dehydrogenase	0	0.69	0.44	0.21	0	0	0.57	0.15	NM_018397	0.56	0.6	1.19	1.63	0.8	0.59	2.29	1.42	AK052715
CHFR	checkpoint with forkhead and ring finger domains	0	0	0	0	0	0	0	0	NM_018223	0	0	0	0	0	0	0.13	0.99	NM_172717
CHI3L1	chitinase 3-like 1 (cartilage glycoprotein-39)	5.05	0	0	0	0	0	0	0	NM_001276	0	0	0	0	0	0	0	0.28	NM_007695
CHIC2	Cysteine-rich hydrophobic domain 2	0	0	0	0	0	0.17	0	0.3	NM_012210	0	0	0	0	0.34	0.1	0.27	0	AK015681
CHID1	chitinase domain containing 1	0.23	0	0	0.21	0.21	0.52	0.57	0.3	NM_023947	0	0	0.13	0.12	0.11	0	0	0.28	NM_026522
CHKA	choline kinase alpha, transcript variant 1	0	0.23	0.22	0	0.21	0	0.19	0.15	NM_001277	0	0	0	0.35	0.34	0	0.27	0.28	NM_013490
CHKB	choline kinase beta, transcript variant 1	0	0.23	0	0.21	0.21	0.35	0.38	0.45	NM_005198	0	0	0	0.12	0.46	0	0.27	0.28	NM_007692
CHMP1B	chromatin modifying protein 1B	0.23	0	0	0.21	0.21	0	0	0.45	NM_020412	0	0.12	0	0	0.11	0.1	0.67	0	NM_024190
CHMP2A	chromatin modifying protein 2A	2.75	1.61	2.62	1.05	1.24	1.56	0.76	2.26	NM_014453	0	1.19	1.33	1.4	1.37	0.88	1.61	2.41	NM_026885
CHMP2B	chromatin modifying protein 2B	0	0	0	0	0.41	0.35	0	0.15	NM_014043	0	0	0.13	0	0.68	0.29	0.4	0.57	NM_026879
CHMP4B	chromatin modifying protein 4B	0.23	0	0.44	0.63	0.21	0.52	0.57	0.15	NM_176812	1.68	0.24	0.53	1.05	1.71	0.29	2.42	1.7	NM_029362
CHMP5	chromatin modifying protein 5	0.46	0	0	0	0	0.52	0.19	0.45	NM_016410	0	0.12	0	0.12	0	0.2	0	0.71	NM_029814
CHMP6	chromatin modifying protein 6	0.23	0.46	0.66	0.21	0	0	0.19	0	NM_024591	0	0.72	0.4	0.47	0.57	0.69	1.21	0.71	NM_001085498
CHMP7	CHMP family, member 7	0	0.46	0	0.21	0	0.35	0.19	0	NM_152272	0.75	0.12	0.27	0.58	0.91	0.59	0.67	0.43	NM_134078
CHPT1	Choline phosphotransferase 1	1.38	0	0	0.63	0	0	0.38	0.3	AK226127	1.5	7.28	9.16	0.58	0.8	0.1	0.81	2.98	NM_144807
CHRDL1	Chordin-like 1	1.15	0	0	0	0	0	0	0	AK092245	0	0	0	0	0	0	0	0	NM_031258
CHRNA4	cholinergic receptor, nicotinic, alpha polypeptide 4	0	0	0	0	0	0	0	0	NM_000744	0	1.55	0.13	0	0.11	0.49	0	0	NM_015730
CHST3	carbohydrate (chondroitin 6) sulfotransferase 3	0	0	0	0	0.41	0.17	0.19	0.3	NM_004273	0	0	0.27	0	0	0	0	0	NM_016803
CHSY1	carbohydrate (chondroitin) synthase 1	0.23	0	0	0.21	0.62	0.35	0.57	0.3	NM_014918	0	0.12	0.13	0	0	0	0	0	NM_001081163
CHUK	conserved helix-loop-helix ubiquitous kinase	0	0	0.22	0	0.21	0	19	0	NM_001278	0	0.84	1.73	0.35	0.46	0	1.08	0.57	NM_007700
CIB1	calcium and integrin binding 1 (calmyrin)	0	0.69	0.66	0.84	1.24	0.87	1.52	0.75	NM_006384	0.37	1.19	0.8	0.47	1.03	0.59	0.27	0.28	NM_011870
CIDEB	cell death-inducing DNA fragmentation factor, alpha subunit-like effector B	0	0.69	0.44	0	0.21	0	0	0.15	NM_014430	0	6.08	8.9	0.58	0.57	0.2	0.27	0.71	NM_009894
CIRBP	cold inducible RNA binding protein	0.69	0.69	0.66	2.1	2.48	1.38	1.14	1.96	NM_001280	0	0	0	0.35	0.23	0	0.54	0.43	NM_007705
CIRH1A	cirrhosis, autosomal recessive 1A (cirhin)	0	0.46	0.22	0	0	0.35	0.19	0.3	NM_032830	0.19	0.24	0	0.12	0.23	0.29	0	0	NM_011574
CISD1	CDGSH iron sulfur domain 1	0.23	0.23	0	0	0.21	0	0	0	BC071795	0.37	0.95	1.19	0.7	1.14	0.39	0.54	0.57	NM_134007
CISD2	CDGSH iron sulfur domain 2	0	0	0	0.21	0	0.17	0	0	BX537971	0.56	0	0	0.12	0	0	0.27	0	NM_025902
CISH	cytokine inducible SH2-containing protein	0	0.23	0.22	0	0.21	0.17	0.57	0.15	NM_145071	0.56	0.12	0	0.12	0.11	0	0	0	NM_009895
CITED2	Cbp/p300-interacting transactivator, with Glu/Asp-rich carboxy-terminal domain, 2	2.75	1.15	0.87	1.47	0.62	0.52	1.33	0.3	NM_006079	1.5	0	0.4	0.23	0.46	0	1.34	0.57	NM_010828
CITED4	Cbp/p300-interacting transactivator, with Glu/Asp-rich carboxy-terminal domain, 4	0.23	0	0	0	0.21	0	0	0	NM_133467	0	0	0.27	0.35	0	0	0.67	0.43	NM_019563
CIZ1	CDKN1A interacting zinc finger protein 1	0.69	0	0.44	0.21	0	0.35	0.19	0	NM_012127	1.5	0.12	0	0.23	0.57	0.29	0.94	0.28	NM_028412
CKAP4	cytoskeleton-associated protein 4	0.23	0	0	0	0.21	0	0	0.45	NM_006825	0.37	0	0.13	0.12	0.57	0.49	0.81	0.43	NM_175451
CKB	creatine kinase, brain	0.23	0	0	2.1	1.24	1.21	0.38	0.75	NM_001823	1.31	0.12	0	9.42	14.81	11.65	1.75	0.57	NM_021273
CLASP1	cytoplasmic linker associated protein 1	0.23	0	0	0.42	0.21	0.17	0	0.15	NM_015282	0	0	0	0	0	0	0	0	NM_001081276
CLBP	ClpB caseinolytic peptidase B homolog (E. coli)	0	0	0	0	0	0	0	0	NM_030813	0	0	0.53	0	0	0	0	0	NM_009191
CLCN7	chloride channel 7	0	0.69	0.22	0.42	0	0.35	0	0.45	NM_001287	0	0.12	0.27	0.12	0	0.2	0.27	0.14	NM_011930
CLCNKA	chloride channel Ka	0	0	0.22	1.68	0.62	1.04	0.19	0.45	NM_004070	0.37	0	0	3.84	2.05	0.88	0.4	0.43	NM_024412
CLCNKB	chloride channel Kb	0	1.61	0.66	10.52	8.46	8.65	3.99	1.21	NM_000085	2.99	0	0	2.09	14.81	12.63	12.23	11.34	NM_019701
CLDN1	claudin 1	0.69	0	0	0	0	0	0	0	NM_021101	2.24	0.72	0.4	0	0	0.1	0.13	0	NM_016674
CLDN2	claudin 2	0.23	6.66	3.06	0	0	0	0	0.15	NM_020384	1.12	13.96	10.75	0	0.46	0.2	0.27	0.14	NM_016675
CLDN3	claudin 3	0.46	0	0.22	1.26	0.21	0.69	1.71	0.6	NM_001306	0.37	0	0	0.12	0.23	0.2	0.81	0.28	NM_009902
CLDN5	claudin 5 (transmembrane protein deleted in velocardiofacial syndrome)	0.69	0	0	0	0.21	0	0	0	NM_003277	11.96	0	0	0.12	0	0.2	0	0	NM_013805
CLDN8	claudin 8	0	0.23	0.22	0.21	0	2.08	1.52	1.36	NM_199328	0	0	0	0.35	0	0.69	4.03	4.68	NM_018778
CLDND1	claudin domain containing 1	0.23	0.23	0.22	0	0	0	0	0	NM_001040181	0.56	0.36	0	0.81	0.23	0	0.54	0.71	NM_171826
CLEC11A	C-type lectin domain family 11, member A	0	0	0.22	0	0	0	0.38	0.15	NM_002975	0	0	0	0.12	0	0.1	0	0	NM_009131
CLEC1B	C-type lectin domain family 1, member B, transcript variant 2	0.46	0	0	0	0	0	0	0	NM_001099431	0	0	0	0	0	0	0	0	NM_019985
CLEC2D	C-type lectin domain family 2, member d	0	0	0	0	0	0	0	0	NM_013269	0.56	0.24	0.13	0.12	0.46	0.2	0	0.57	NM_053109
CLEC3B	C-type lectin domain family 3, member B	3.21	0.23	0	0	0	0.35	0	2.11	NM_003278	0	0	0	0	0	0	0	0	NM_011606
CLEC4F	C-type lectin domain family 4, member F	0.23	0.46	0.22	0.42	0	0.17	0.19	0.15	NM_173535	0	0	0	0	0	0	0	0	NM_016751
CLEC4G	C-type lectin superfamily 4, member G	0.69	0.23	0	0	0	0	0.19	0.15	NM_198492	0	0	0	0	0	0	0	0	NM_029465
CLIC1	chloride intracellular channel 1	3.67	2.76	3.06	2.31	5.57	2.08	2.09	3.01	NM_001288	4.67	0.72	0.27	1.05	1.6	0.78	2.82	1.13	NM_033444
CLIC3	chloride intracellular channel 3	0	0	0	0	0	0	0	0.15	NM_004669	7.85	0	0	0	0	0	0	0.43	NM_027085
CLIC4	chloride intracellular channel 4	0.69	0.92	3.06	0	0.21	0	0	0.15	NM_013943	0.19	0.36	0.8	0.35	0	0	0	0.57	NM_013885
CLIC5	chloride intracellular channel 5	9.41	0	0	0	0	0	0	0	NM_016929	0.19	0	0	0	0	0	0	0	NM_172621
CLINT1	clathrin interactor 1	0.23	0	0	0	0.21	0.69	0	0.6	NM_014666	0	0.12	0.4	0	0.23	0	0.4	0.14	NM_001045520
CLIP4	CAP-GLY domain containing linker protein family, member 4	0.23	0	0	0	0	0	0.38	0	NM_024692	0	0.12	0	0.12	0	0	0	0	NM_030179
CLK1	CDC-like kinase 1	1.38	0.23	0	0.63	0.41	0.52	0.95	0.3	NM_004071	0	0	0.27	0.11	0	0.2	0.4	0	NM_009905
CLK2	CDC-like kinase 2	0.69	0	0.22	0	0.21	0.35	0.95	0.15	NM_003993	0	0	0	0	0	0	0.27	0.14	NM_007712
CLK3	CDC-like kinase 3	0.23	0	0	0.21	0	0.35	0.19	0.15	NM_001292	0.37	0	0	0.35	0.34	0.1	0.81	0.14	NM_007713
CLK4	CDC like kinase 4	0	0	0	0	0.21	0.17	0.19	0.15	NM_020666	0	0	0	0.23	0.11	0	0.27	0	NM_007714
CLN5	ceroid-lipofuscinosis, neuronal 5	0	0.23	0.22	0.21	0	0	0.19	0.15	NM_006493	0	0	0.13	0.23	0.23	0	0.27	0.28	NM_001033242
CLN6	ceroid-lipofuscinosis, neuronal 6	0	0	0	0	0.21	0	0.19	0	NM_017882	1.31	0.48	0.66	0.47	0.57	0.98	0.94	0.28	NM_001033175
CLNS1A	chloride channel, nucleotide-sensitive, 1A	0.23	0	0.22	0	0	0.35	0	0.3	NM_001293	0.19	0.12	0.27	0.35	0.23	0.2	0.4	0.57	NM_023671
CLOCK	circadian locomoter output cycles kaput	0	0	0	0	0.41	0	0	0.15	NM_004898	0	0.24	0.13	0.23	0.11	0	0	0.43	NM_007715
CLP1	CLP1, cleavage and polyadenylation factor I subunit, homolog (S. cerevisiae)	0.46	0.23	0.44	0.21	0.62	0.52	0.38	0.45	AK096335	0	0.24	0	0	0	0	0	0	NM_133840
CLPP	caseinolytic peptidase, ATP-dependent, proteolytic subunit homolog (E. coli)	0.69	0.23	0.22	0.42	0.21	0.35	0	0	NM_006012	1.31	0.72	1.99	0.93	1.6	1.37	0.27	0.43	NM_017393
CLPTM1	cleft lip and palate associated transmembrane protein 1	0.69	0.92	1.31	0.63	1.86	1.04	0.57	0.75	NM_001294	0	0	0	0	0	0	0	0	NM_019649
CLPTM1L	CLPTM1-like	0.69	1.38	1.75	0.21	0.41	0.35	0.57	0	NM_030782	1.87	2.03	1.46	0.93	2.85	1.37	3.36	2.41	NM_146047
CLRN3	clarin 3	0	1.61	0.66	0	0	0	0	0	NM_152311	0	0	0	0	0	0	0	0	NM_178669
CLSTN1	calsyntenin 1	0.23	0	0	0.63	0.21	0.17	0.38	0.15	NM_001009566	0.37	0	0	0.35	0	0.1	0.54	0.14	NM_023051
CLSTN3	calsyntenin 3	0.23	0.46	0.66	0.42	0.41	0.35	0	0	NM_014718	0	0	0	0	0	0	0	0	NM_153508
CLTB	clathrin, light chain, transcript variant 1	0.69	0.23	0.44	0.21	0	0.52	0.38	0.3	NM_001834	0	0.36	0	0	0	0	0	0	NM_028870
CLTC	clathrin, heavy polypeptide (Hc)	0.23	0.23	0	0.21	0.62	0.17	0	0.45	NM_004859	2.24	5.85	2.39	1.28	2.16	2.15	1.48	2.41	NM_001003908
CLU	clusterin	0	0	0	0	0	0	0	0	NM_001831	2.62	0.24	0	0	0.23	6.07	2.82	0	NM_013492
CLUAP1	clusterin associated protein 1, transcript variant 1	0	0.46	0	0	0	0	0.19	0.15	NM_015041	0	0	0.13	0.12	0.11	0	0.13	0.28	NM_029738
CLYBL	citrate lyase beta like	0	0.46	0.87	0.21	0	0	0.19	0.15	NM_206808	0.37	0.36	1.06	0.23	0.11	0.29	0.27	0.43	NM_029556
CMAH	Cytidine monophosphate-N-acetylneuraminic acid hydroxylase (CMP-N-acetylneuraminate monooxygenase)	0.46	0	0	0	0	0	0	0	AK000716	0	0	0	0	0	0	0	0	NM_007717
CMPK	cytidylate kinase	0.23	0	0	0	0	0	0.19	0	NM_016308	0	0.6	1.19	0.47	0	0.2	0.13	1.99	NM_025647
CMTM6	CKLF-like MARVEL transmembrane domain containing 6	0.46	0.23	0	0	0.21	0	0.19	0	NM_017801	0.93	1.91	2.66	0.23	0.57	0.69	0.81	0.14	NM_026036
CMTM8	CKLF-like MARVEL transmembrane domain containing 8	0.23	0	0	0	0	0	0	0	NM_178868	2.43	0.24	0	0.35	0.46	0.2	0.13	0	NM_027294
CNBP	CCHC-type zinc finger, nucleic acid binding protein	0.92	0	0.44	0.42	1.86	0.69	0.57	0.6	NM_003418	1.31	0.12	0.27	0.12	0.23	0.2	0.4	1.28	NM_013493
CNDP1	carnosine dipeptidase 1 (metallopeptidase M20 family)	0	0	0	0	0	0	0	0	NM_032649	0	0.6	0.93	0	0	0	0	0	NM_177450
CNDP2	CNDP dipeptidase 2 (metallopeptidase M20 family)	0.92	3.45	2.84	0.84	0	0.17	0.57	1.66	NM_018235	0.19	2.39	1.46	0.35	0.57	0.78	0	0.71	NM_023149
CNGA3	cyclic nucleotide gated channel alpha 3	0	0	0	0	0	0	0	0	NM_001298	0	0.6	0.27	0.12	0.11	0	0	0.43	NM_009918
CNIH	cornichon homolog (Drosophila)	0.23	0.23	0.87	0.42	1.03	0.35	0.19	0.15	NM_005776	0	0.24	0	0.23	0	0	0	0	NM_009919
CNIH4	cornichon homolog 4 (Drosophila)	0.69	0	0	0	0	0.17	0.38	0.15	NM_014184	0.19	0.12	0.13	0	0.34	0.39	0.27	0.14	NM_030131
CNKSR3	CNKSR family member 3	0.92	0	0.87	0	0.62	0.17	0	0.15	NM_173515	0	0	0	0.12	0	0	0.13	0.28	NM_172546
CNN3	calponin 3, acidic	1.61	0.46	0.66	0.42	0.83	0.35	0.57	0.6	NM_001839	0.19	0.24	0	0.47	0.23	0.2	0.81	0.85	NM_028044
CNO	cappuccino homolog (mouse)	0.46	0	0.22	0.42	0	0	0.19	0.45	NM_018366	0.37	0	0	0	0	0.2	0.27	0	NM_133724
CNOT1	CCR4-NOT transcription complex, subunit 1, transcript variant 1	0.23	0.23	0.22	0	0.21	0	0.38	0	NM_016284	0	0	0	0	0.11	0.1	0.13	0	XM_894673
CNOT10	CCR4-NOT transcription complex, subunit 10	0	0.23	0	0.21	0	0	0.19	0.15	NM_015442	5.23	0.24	0.13	0.81	1.82	1.47	2.29	1.13	NM_153585
CNOT3	CCR4-NOT transcription complex, subunit 3	0.23	0	0.44	0	0.41	0.17	0	0.6	NM_014516	0.75	0	0.13	0.12	0.11	0.39	0	0.43	NM_146176
CNOT7	CCR4-NOT transcription complex, subunit 7	0.23	0	0	0	0.21	0	0	0	NM_013354	0	0.12	0.13	0	0.34	0.39	0.4	0.28	NM_011135
CNOT8	CCR4-NOT transcription complex, subunit 8	0	0	0.44	0	0.41	0.52	0.19	0	NM_004779	0	0.12	0	0.23	0.11	0	0.27	0.28	NM_026949
CNTD1	cyclin N-terminal domain containing 1	0.23	0.69	0	0	0	0.69	0	0	NM_173478	0	0	0	0	0	0	0	0	NM_026562
COASY	Coenzyme A synthase	0	0.46	0.22	0.21	0.21	0.17	0.38	0.3	NM_025233	1.12	2.27	3.19	0	0.23	0.29	0.13	0	NM_027896
COG1	component of oligomeric golgi complex 1	0.23	0.46	0.22	0	0	0.17	0.19	0	NM_018714	0	0.12	0	0.58	0.23	0.39	1.21	0.57	NM_013581
COG2	component of oligomeric golgi complex 2	0	0	0.22	0	0.62	0.17	0.38	0	NM_007357	0	0	0	0.12	0.23	0.2	0.13	0.28	NM_029746
COG4	component of oligomeric golgi complex 4	0.92	0.23	0.22	0.21	0.21	0.17	0.19	0.15	NM_015386	0	0	0	0.23	0.11	0	0.27	0.14	NM_133973
COG7	component of oligomeric golgi complex 7	0	0	0	0	0.21	0	0.19	0.15	NM_153603	0	0	0	0.12	0.34	0.49	0.94	0.57	NM_001033318
COL16A1	collagen, type XVI, alpha 1	0	1.15	0.66	0	1.03	0.35	0.38	0.3	NM_001856	0	0	0	0	0	0	0	0	NM_028266
COL1A1	collagen, type I, alpha 1	0	0	0.22	0	0	0	0.38	0.3	NM_000088	0	0	0.13	0.35	0.57	0.2	0.81	0.85	NM_009929
COL4A1	collagen, type IV, alpha 1	0.46	0	0.44	0.42	0.21	0.17	0.19	0	NM_001845	0.93	0.12	0.13	0.12	0	0	0.13	0.28	NM_009931
COL4A2	procollagen, type IV, alpha 2	0	0	0.44	0.21	0.21	0	0	0	NM_001846	1.87	0.12	0.13	0	0.23	0	0.4	0.28	NM_009932
COL4A3BP	Procollagen, type IV, alpha 3 (Goodpasture antigen) binding protein	0	0	0	0	0	0	0	0	NM_005713	1.5	0	0.4	0.23	0.11	0	0.4	0.43	AK020301
COL4A4	collagen, type IV, alpha 4	0.69	0	0	0	0.21	0	0	0.15	NM_000092	1.87	0.12	0	1.05	0.57	0.1	0.54	0.71	NM_007735
COL9A2	collagen, type IX, alpha 2	0.46	0.46	0.66	0.84	0.41	0	1.9	1.96	NM_001852	0	0	0	0	0	0	0	0	NM_007741
COLEC12	collectin sub-family member 12	0	0	0	0	0	0	0	0	NM_130386	1.5	0.12	0.4	0.7	0.34	0	0.13	0.99	NM_130449
COMMD10	COMM domain containing 10	0.23	0	0	0	0	0	0	0	NM_016144	0	0.36	0.4	0.23	0.23	0.2	0.27	0.99	NM_178377
COMMD2	COMM domain containing 2	0.46	0.23	0	0	0.41	0.17	0.19	0.3	NM_016094	0	0.12	0.27	0.23	0	0	0	0.14	NM_175095
COMMD3	COMM domain containing 3	0.69	0.23	0.44	0.21	0.83	0.35	0.38	0	NM_012071	0	0.36	1.46	0.23	0.23	0	0	0.14	NM_147778
COMMD5	COMM domain containing 5	0	0	0	0	0.21	0.17	0.19	0	NM_014066	0	0.24	0.27	0.23	0.11	0.2	0.94	0.43	NM_025536
COMMD6	COMM domain containing 6	0.23	0	0	0	0	0	0	0	NM_203497	0.93	0.6	0.27	0	0.11	0.1	0.13	0.43	NM_001033132
COMMD9	COMM domain containing 9	0	0	0.22	0.21	0.21	0.17	0.19	0	NM_014186	0.19	0.48	0.4	0	0.34	0	0.27	0	NM_029635
COMT	catechol-O-methyltransferase	0.46	0	0.22	1.05	0.83	0.69	1.14	1.36	NM_007310	1.12	3.22	0.66	0.23	0.57	0.39	0.13	0.28	NM_007744
COPB1	coatomer protein complex, subunit beta 1	0.69	0.46	0.66	0	0.21	0.69	0.19	0.3	NM_016451	0	1.31	0.66	0.35	0	0.29	0.81	0.99	NM_033370
COPB2	coatomer protein complex, subunit beta 2 (beta prime)	0.23	0	0	0	0	0	0	0	NM_004766	0.37	2.15	2.12	0.23	0.68	0.78	0.81	0.71	NM_015827
COPE	coatomer protein complex, subunit epsilon	0.46	0	0.66	0.21	0.21	0.69	0.76	0.15	NM_007263	0.93	0.84	0.53	0.23	0.91	1.76	1.08	0	NM_021538
COPG	coatomer protein complex, subunit gamma	0	0.46	0.22	0	0.21	0	0	0.15	NM_016128	0	0	0	0	0.23	0	0.54	0	NM_017477
COPG2	coatomer protein complex, subunit gamma 2	0	0	0	0.42	0.21	0	0	0	NM_012133	0	0.24	0	0	0.23	0.39	0.13	0.14	NM_017478
COPS2	COP9 constitutive photomorphogenic homolog subunit 2 (Arabidopsis)	0.46	0	0.66	0.21	0.83	0	0.57	0.15	NM_004236	0	0.12	0.13	0	0	0.1	0	0	NM_009939
COPS3	COP9 (constitutive photomorphogenic) homolog, subunit 3 (Arabidopsis thaliana)	0	0	0.22	0.21	0.17	0	0	0.15	NM_003653	1.12	0.48	0	0.35	0.57	2.15	1.48	0.43	NM_011991
COPS4	COP9 constitutive photomorphogenic homolog subunit 4 (Arabidopsis)	0.46	0.23	0	0.21	0.21	0.17	0	0.6	NM_016129	3.92	0.24	0.13	0.58	0.68	0.39	0.54	0.14	NM_012001
COPS5	COP9 (constitutive photomorphogenic) homolog, subunit 5 (Arabidopsis thaliana)	0	0.23	0.22	0.21	1.24	0.52	0.19	0	NM_006837	0.19	0.48	0	0	0.34	0.1	1.08	0.43	NM_013715
COPS6	COP9 constitutive photomorphogenic homolog subunit 6 (Arabidopsis)	0.46	0.46	0.44	0.21	0.41	0.35	0.57	0.75	NM_006833	3.74	1.91	0.8	1.98	1.82	1.47	1.88	2.69	NM_012002
COPS7A	COP9 constitutive photomorphogenic homolog subunit 7A (Arabidopsis)	0	0.23	0.22	0.21	0	0	0.38	0.45	NM_016319	0	0.12	0.27	0.35	0	0.2	0.4	0.57	NM_012003
COPS7B	COP9 (constitutive photomorphogenic) homolog, subunit 7b (Arabidopsis thaliana)	0	0.23	0	0	0	0	0.19	0	NM_022730	0	0	0.13	0.35	0.11	0	0.4	0	NM_172974
COPS8	COP9 (constitutive photomorphogenic) homolog, subunit 8 (Arabidopsis thaliana)	0	0	0	0	0	0	0	0	NM_006710	0.37	0	0	0	0	0.29	0	0	NM_133805
COPZ1	coatomer protein complex, subunit zeta 1	0	0	0.22	0	0.62	0.35	0.19	0.3	NM_016057	0.75	0.36	0.27	0.47	0	0	0.4	0.71	NM_019817
COPZ2	coatomer protein complex, subunit zeta 2	0	0	0	0	0	0	0	0.15	NM_016429	0.37	0	0.13	0.47	0.8	0.2	0.4	0.14	NM_019877
COQ10B	coenzyme Q10 homolog B (S. cerevisiae)	0.23	0	0.44	0.21	0.21	0.35	0	0.3	NM_025147	0	0.12	0	0	0.11	0	0.13	0.57	NM_026424
COQ2	coenzyme Q2 homolog, prenyltransferase (yeast)	0	0	0	0.21	0	0.17	0	0.15	NM_015697	0	1.31	2.52	0.23	0.23	0.29	0	0.57	NM_027978
COQ5	coenzyme Q5 homolog, methyltransferase (S. cerevisiae)	0.46	0.92	0.22	0.42	0.21	0	0.76	0.3	NM_032314	0	0.12	0.13	0	0.11	0	0	0.14	NM_026504
COQ7	demethyl-Q 7	0	0	0	0	0.21	0	0	0.15	NM_016138	0	0.36	0.13	0.12	0.23	0.2	0.54	0	NM_009940
COQ9	coenzyme Q9 homolog (yeast)	0	0.23	0.87	0.63	0.41	0.35	0.57	0.15	NM_020312	0	3.22	2.79	1.05	0.8	0.2	0	0.57	NM_026452
COQ9	coenzyme Q9 homolog (S. cerevisiae)	0	0.23	0.87	0.63	0.41	0.35	0.57	0.15	NM_020312	0	3.22	2.79	1.05	0.8	0.2	0	0.57	NM_026452
CORO1B	coronin, actin binding protein 1B	0.69	0.69	0	0.63	1.03	0.35	0.19	1.05	NM_020441	0.75	0.24	1.06	0.7	0.68	0.39	1.08	3.26	NM_011778
CORO1C	coronin, actin binding protein 1C	0.23	0.23	0	0	0	0	0	0	NM_014325	0	0	0	0	0	0	0.27	0	NM_011779
COTL1	coactosin-like 1 (Dictyostelium)	0.46	2.76	1.09	0	0.62	0.35	0.19	0.45	NM_021149	0	0.12	0.13	0	0.11	0	0.27	0.14	NM_028071
COX10	COX10 homolog, cytochrome c oxidase assembly protein, heme A: farnesyltransferase (yeast)	0	0	0	0	0.21	0	0	0	NM_001303	0.75	0.36	0.13	0.58	0.57	1.18	0.27	0.43	AK154668
COX15	COX15 homolog, cytochrome c oxidase assembly protein (yeast)	0	0	0	0	0	0.17	0	0	NM_078470	0	0.36	0	0.23	0.23	0.1	0.27	0.28	NM_144874
COX2	cytochrome c oxidase II, mitochondrial	10.56	72.15	157	120.54	31.38	110.57	44.27	38.87	NC001807	51.77	266.74	210.05	186.56	213.2	251.2	67.62	109.89	NC_005089.1 (7013..7696)
COX2	mitochondrially encoded cytochrome c oxidase II	10.56	72.15	157	120.54	31.38	110.57	44.27	38.87	NC_001807.4 (7587..8270)	51.77	266.74	210.05	186.56	213.2	251.2	67.62	109.89	NC_005089.1 (5328..6872)
COX4I1	cytochrome c oxidase subunit IV isoform 1	0.92	5.51	2.84	5.26	8.46	6.75	3.99	3.62	NM_001861	2.24	8.11	10.09	8.14	11.39	16.36	9.01	7.52	NM_009941
COX5B	cytochrome c oxidase subunit Vb	0.69	2.53	2.19	2.52	2.27	3.98	2.47	1.81	NM_001862	0.75	5.49	4.65	11.4	8.55	6.56	3.23	4.11	NM_009942
COX6A1	cytochrome c oxidase subunit VIa polypeptide 1, nuclear gene encoding mitochondrial protein	0	0.46	0.44	0.21	0.62	0.69	0.19	0.45	NM_004373	13.08	36.5	25.63	17.33	18.46	12.44	7.39	19.99	NM_007748
COX6B1	cytochrome c oxidase subunit Vib polypeptide 1 (ubiquitous)	1.15	4.14	1.97	5.05	3.51	6.75	4.18	4.07	NM_001863	7.48	10.74	8.9	19.19	20.74	7.83	12.64	9.64	NM_025628
COX7A2	cytochrome c oxidase subunit VIIa polypeptide 2 (liver)	2.29	1.38	0.66	1.89	3.51	4.15	2.09	1.66	NM_001865	7.1	16.22	3.98	6.05	9.91	6.37	6.05	3.97	NM_009945
COX7A2L	cytochrome c oxidase subunit VIIa polypeptide 2-like	0.46	0	0.66	1.05	1.65	0.87	0.76	0.15	NM_004718	2.24	0.72	0.4	2.33	2.62	5.19	4.7	1.7	NM_009187
COX7C	cytochrome c oxidase, subunit VIIc	9.64	20.91	13.99	13.88	22.92	22.15	13.49	11.6	NM_001867	1.5	5.85	2.79	3.95	6.04	5.48	3.5	2.69	NM_007749
COX8A	cytochrome c oxidase subunit 8A (ubiquitous)	3.9	3.91	2.19	5.47	7.23	7.09	4.75	4.67	NM_004074	5.23	22.43	23.1	14.89	8.77	3.43	3.76	10.21	NM_007750
CPD	carboxypeptidase D	0.92	0	0	0.21	0	0	0.19	0	NM_001304	0	0	0	0	0	0	0	0	NM_007754
CPE	carboxypeptidase E	0	0.23	1.09	0	0	0	0.19	0	NM_001873	0.37	0.36	0.13	0	0	0.29	0	0	NM_013494
CPEB4	cytoplasmic polyadenylation element binding protein 4	0.69	0	1.53	0	0.41	0.52	0.19	0.3	NM_030627	0	0	0	0	0	0	0	0	NM_026252
CPNE2	copine II	0.46	0	0	0	0	0	0	0.15	NM_152727	0	0	0	0	0	0	0	0	NM_153507
CPNE3	copine III	0	0.23	0	0.84	0.41	0.69	0.19	0	NM_003909	0.37	0.36	0.13	1.4	0.68	0.49	0.81	0.57	NM_027769
CPSF1	cleavage and polyadenylation specific factor 1, 160kDa	0	0.69	0.44	0.42	0	0.17	0	0.3	NM_013291	0	0	0	0	0	0	0	0	NM_053193
CPSF3L	cleavage and polyadenylation specific factor 3-like	0.46	0.23	1.31	0.21	0	0.35	0.38	0.6	NM_017871	0	0	0.27	0.12	0.46	0.39	1.08	0.57	NM_028020
CPT1A	Carnitine palmitoyltransferase 1A	0.23	0.23	0.22	0.42	0	0.69	0.57	0	AK172798	0	0.24	0.13	0.35	0	0.2	0.13	0.57	NM_013495
CPT2	carnitine palmitoyltransferase 2	0	0.23	0	0.21	0	0.35	0.19	0.15	NM_000098	0.19	0.6	0.66	0.12	0.23	0.39	0.13	0.14	NM_009949
CRBN	cereblon	1.84	0	0.22	0.21	0.21	0.17	0	0.15	NM_016302	0.19	0.12	0.13	0.23	0	0.1	0	0.28	NM_175357
CREB3	cAMP responsive element binding protein 3	0.46	0.23	0	0.21	0	0.17	0	0.3	NM_006368	0.75	0	0.27	0	0	0	0.27	0.14	NM_011957
CREB3L2	CAMP responsive element binding protein 3-like 2	0.23	0	0	0	0.62	0	0	0.15	NM_194071	0.75	0.12	0.13	0.47	0.23	0	0.27	0.14	AK082964
CREBBP	CREB binding protein	0	0	0	0	0.21	0	0	0	NM_004380	0.19	0	0.27	0.35	0.46	0	0.27	0.14	CO810196
CREBL2	CAMP responsive element binding protein-like 2	0	0	0	0.21	0	0	0.19	0.45	NM_001310	0	0.12	0	0.23	0.46	0.1	0.4	0.14	BF535186
CREBZF	CREB/ATF bZIP transcription factor	0.23	0	0	0	0	0.17	0.19	0.15	NM_001039618	0.93	0.24	0.13	0	0.11	0.1	0.13	0.43	NM_145151
CREG1	cellular repressor of E1A-stimulated genes 1	0.92	4.14	0.87	1.26	1.24	1.73	2.28	1.66	NM_003851	0	0	0	0	0	0	0.13	0	NM_011804
CRELD2	cysteine-rich with EGF-like domains 2	0	0	0.44	0	0.21	0.35	0	0.15	NM_024324	0.19	1.43	0.8	0.35	0	0.78	0.4	0.57	NM_029720
CRHBP	corticotropin releasing hormone binding protein	5.97	0	0	0	0	0	0	0	NM_001882	0	0	0	0	0	0	0	0	NM_198408
CRIM1	cysteine rich transmembrane BMP regulator 1 (chordin-like)	1.84	0	0.22	0	0	0.35	0.19	0.15	NM_016441	0	0	0	0	0	0	0	0	NM_015800
CRIP2	cysteine rich protein 2	5.05	0	0.22	1.26	2.27	1.04	2.09	3.31	NM_001312	0.93	0	0	2.56	2.16	0	2.42	1.42	NM_024223
CRIP3	Cysteine-rich protein 3	0.46	0	0	0	0	0	0	0	AK124657	0	0	0	0	0.11	0	0	0	NM_053250
CRKL	v-crk sarcoma virus CT10 oncogene homolog (avian)-like	0	0.69	0	0	0	0	0.19	0	NM_005207	0	0	0	0	0	0	0	0	NM_007764
CRLS1	cardiolipin synthase 1	0.46	0.46	0	0.42	0.21	0	0.57	0	NM_019095	0	0	0	0.12	0	0	0.13	0	NM_025646
CROT	carnitine O-octanoyltransferase	0.46	0	0.44	0.21	0	0.17	0.57	0.15	NM_021151	0.19	2.86	7.97	0.12	0.91	1.18	1.75	0.28	NM_023733
CRTC2	CREB regulated transcription coactivator 2	0	0	0	0.21	0.21	0.17	0.19	0	NM_181875	0	0.12	0.13	0.12	0.34	0.1	0.81	0.14	NM_028881
CRY1	Cryptochrome 1 (photolyase-like)	0	0	0	0	0	0	0.57	0	AK125915	0	0	0	0	0	0	0.13	0	NM_007771
CRY2	cryptochrome 2 (photolyase-like)	0	0.46	0.44	0.21	0.21	0.17	0.19	0.75	NM_021117	0	0	0.13	0	0	0	0	0	NM_009963
CRYAA	crystallin, alpha A	0	0.92	0.22	0	0	0.35	0	0	NM_000394	0	0	0	0	0	0	0	0	NM_013501
CRYAB	crystallin, alpha B	2.52	4.37	5.9	0.42	0.21	0.69	0.57	11.3	NM_001885	3.92	0	8.1	3.14	0.8	0	4.44	9.22	NM_009964
CRYL1	crystallin, lambda 1	1.15	2.07	1.31	1.47	0.83	1.38	0.95	1.51	NM_015974	0.37	0.24	0.27	0	0.11	0.2	0	0	NM_030004
CRYM	crystallin, mu	0	0.69	0.66	0	0	0.17	0	0.15	NM_001888	0.37	1.07	0.4	0	0	0	0	0	NM_016669
CRYZ	crystallin, zeta	0.23	0.23	0.66	0.21	0.83	0.52	1.9	1.51	NM_001889	0	0.95	1.86	0.58	0.34	0.29	0.54	0.57	NM_009968
CS	citrate synthase	0.46	0.23	0.44	0.42	0.83	0.52	1.52	0.6	NM_198324	0	0.24	0	0.58	0.11	0.39	0.4	0.85	NM_026444
CSDA	cold shock domain protein A	1.38	0	0.22	0.63	0.62	0.69	1.14	1.51	NM_003651	1.5	0	0.27	0.23	0.11	0	0.27	0.43	NM_139117
CSDE1	cold shock domain containing E1, RNA binding	1.61	0.46	1.09	0	0.21	0	0.38	0.15	NM_001007553	0.75	0.24	0.27	0.47	0.46	0.1	0.54	0.71	NM_144901
CSF1R	colony stimulating factor 1 receptor	0	0	0	0	0	0.17	0	0	NM_005211	1.5	0.24	0.93	0.23	0	0	0.13	0	NM_001037859
CSK	c-src tyrosine kinase	0	0	0	0	0	0.17	0.19	0	NM_004383	0	0.12	0	0.23	0.34	0	0.13	0.85	NM_007783
CSNK1A1	Casein kinase 1, alpha 1	1.38	0.23	0.22	0.21	0.62	0.17	0.19	0.45	BX647478	0	0.36	0.27	0.35	1.14	0.2	0.13	0	AK152387
CSNK1E	casein kinase 1, epsilon	0.23	0	0	0	0.41	0	0	0.45	NM_152221	0	0	0	0	0.11	0	0.13	0.57	NM_013767
CSNK1G2	casein kinase 1, gamma 2	0	0	0	0.21	0.17	0	0	0.15	NM_001319	1.68	1.43	0.66	1.05	1.37	0.2	1.48	0.71	NM_134002
CSNK2A2	casein kinase 2, alpha prime polypeptide	0	0	0	0	0	0	0	0	NM_001896	0.37	0	0.13	0	0.11	0	0.54	0.43	NM_009974
CSNK2B	casein kinase 2, beta polypeptide	0.46	1.38	0.44	1.68	0.83	0.52	1.33	0.9	NM_001320	1.68	0.84	1.46	0.7	0.68	0.1	1.34	0.71	NM_009975
CSRP1	cysteine and glycine-rich protein 1	3.21	0.46	0.44	0.42	0.62	1.9	0.57	1.05	NM_004078	2.06	0.24	0	0	0.23	0.78	0.27	2.27	NM_007791
CSRP2	cysteine and glycine-rich protein 2	0.23	0	0.22	0	0	0.35	0	0.15	NM_001321	1.68	3.94	2.12	2.09	0.68	2.15	6.32	6.66	NM_007792
CSRP2BP	cysteine and glycine-rich protein 2 binding protein	0	0	0	0.21	0	0	0	0	NM_020536	0.75	0.72	0.13	0.47	0.46	0.2	0.81	0.71	NM_181417
CST3	cystatin C (amyloid angiopathy and cerebral hemorrhage)	1.38	2.53	4.15	4.21	2.89	1.38	1.71	1.51	NM_000099	3.92	1.79	0.27	4.19	6.15	3.92	4.57	3.54	NM_009976
CSTA	Cystatin A (stefin A)	0.46	0	0	0	0.21	0	0	0	CD520285	0	0	0	0	0	0	0	0	NM_001033239
CSTB	Cystatin B (stefin B)	0	0.23	0.44	0	0	0	0	0	CR591371	0	1.19	0.66	0.12	0.34	0.2	0.13	0.14	NM_007793
CSTB	cystatin B (stefin B)	0.92	0	0.87	0.21	1.03	1.04	0.19	1.81	NM_000100	0	1.19	0.66	0.12	0.34	0.2	0.13	0.14	NM_007793
CSTF2T	cleavage stimulation factor, 3' pre-RNA subunit 2, tau	0	0	0	0	0	0.17	0	0	NM_015235	0.19	0	0	0.12	0.11	0.1	0.4	0.28	NM_031249
CTBP1	C-terminal binding protein 1	0	0	0.66	0.63	0	0.17	0.19	0.15	NM_001328	0.19	0.12	0.27	0.12	0.11	0	0	0.43	NM_013502
CTBS	Chitobiase, di-N-acetyl-	0.23	0.23	0.44	0.42	0.21	0	0	0.15	BC096752	0	0	0	0	0	0	0	0	NM_028836
CTCF	CCCTC-binding factor (zinc finger protein)	0	0.46	0	0	0	0	0	0.3	NM_006565	0	0	0	0.23	0	0	0.13	0.14	NM_007794
CTDSP1	CTD (carboxy-terminal domain, RNA polymerase II, polypeptide A) small phosphatase 1, transcript variant 1	0.23	0	0.22	0.42	0.62	0	0.19	0.3	NM_021198	0.37	0.72	0.13	0	0	0.1	0.54	0	NM_153088
CTDSP2	CTD (carboxy-terminal domain, RNA polymerase II, polypeptide A) small phosphatase 2	0.46	0.23	0	0.21	0.21	0.35	0.38	0.75	NM_005730	2.24	0.48	0.27	0.58	0.23	0.1	0.54	1.28	NM_146012
CTDSPL2	CTD (carboxy-terminal domain, RNA polymerase II, polypeptide A) small phosphatase like 2	0	0	0	0	0	0	0	0	NM_016396	0	0	0	0.12	0.23	0	0.4	0	BU509938
CTF1	cardiotrophin 1	0.23	0	0.44	0.21	0.41	0.17	0.19	0.3	NM_001330	0	0	0	0	0.11	0	0	0	NM_007795
CTGF	connective tissue growth factor	48.65	0.46	0	6.1	0.83	2.42	0.95	1.81	NM_001901	0	0	0	0	0	0	0	0	NM_010217
CTH	cystathionase (cystathionine gamma-lyase)	0	0	0	0	0	0	0	0	NM_001902	0.56	1.31	3.72	0.12	0	0	0.13	0.57	NM_145953
CTNNAL1	catenin (cadherin-associated protein), alpha-like 1	0.69	0.46	0.22	0.21	1.03	0.35	0.38	0.45	NM_003798	0.37	0	0	0.58	0.68	0.1	0.81	1.56	NM_018761
CTNNB1	catenin (cadherin associated protein), beta 1	0.92	0.23	0.44	0	0.62	0.17	0.38	0.15	NM_001904	0.93	0.72	0.53	0.81	1.03	0.29	0.4	1.13	NM_007614
CTNNBIP1	catenin beta interacting protein 1	0.69	0	0	0	0	0.17	0	0	NM_020248	0	0.12	0	0	0	0.1	0.27	0.14	NM_023465
CTNNBL1	catenin, beta like 1	0.46	0.23	0	0.42	0.21	0	0.38	0.15	NM_030877	0.19	0	0	0.12	0.11	0.1	0.13	0	NM_025680
CTR9	Ctr9, Paf1/RNA polymerase II complex component, homolog (S. cerevisiae)	0.23	0.23	0.44	0.21	0	0.52	0	0.45	NM_014633	0	0.24	0.13	0	0.23	0.2	0.27	0.14	NM_009431
CTSA	cathepsin A	1.38	2.99	1.75	0	1.03	1.04	0.76	1.05	NM_000308	0	0	0	0	0	0	0	0	NM_008906
CTSC	cathepsin C, transcript variant 1	0	1.84	1.75	1.68	0.41	1.21	0.57	0.3	NM_001814	0	0	0	0	0	0	0	0	NM_009982
CTSD	cathepsin D	3.67	4.37	9.18	6.52	9.08	9	7.79	8.14	NM_001909	13.83	0.84	3.05	3.26	10.94	3.92	9.68	9.36	NM_009983
CTSE	Cathepsin E	0.23	0	0	0	0	0	0	0	NM_001910	0.93	0.84	0.53	1.28	0.57	0.2	11.16	10.78	AK083315
CTSF	cathepsin F	0.46	0.23	0.44	0.63	1.65	0.35	0	0.6	NM_003793	0	0	0.4	1.16	0.68	0.1	0.13	0.14	NM_019861
CTSZ	cathepsin Z	0.46	0.23	0.66	0.42	0	0	0	0	NM_001336	0.19	2.74	0.66	0	0.11	0	0.67	0.57	NM_022325
CUEDC1	CUE domain containing 1	0	0	0	0.21	0.21	0.17	0.38	0.45	NM_017949	1.87	0	0	0.12	0.8	0.88	1.48	1.42	AK049250
CUEDC2	CUE domain containing 2	0	0	0	0	0.21	0.52	0.57	0.3	NM_024040	0	0.24	0.27	0.35	0.57	0.1	1.08	0.43	NM_024192
CUL1	cullin 1	0.69	0	0	0	0.62	0.87	0.76	0.15	NM_003592	0	0.12	0	0.12	0.11	0.39	0.27	0.28	NM_012042
CUL2	cullin 2	0	0	0	0	0	0	0.57	0.15	NM_003591	0	0	0	0	0	0	0	0	NM_029402
CUL3	cullin 3	0	0	0.22	0	0	0	0	0	NM_003590	1.12	0.48	0.53	0.35	0.57	0.49	0.54	0.57	NM_016716
CUTL1	cut-like 1 (Drosophila), transcript variant 2	0	0	0.22	0	0.21	0	0	0.15	NM_181552	0	0.48	0.27	0.23	0.46	0.78	0	0.28	NM_198602
CX3CL1	chemokine (C-X3-C motif) ligand 1	2.29	0.23	0.22	0	0	0.17	0	0.75	NM_002996	0	0.24	0.27	0.12	0.23	0	0	0	NM_009142
CX40.1	connexin40.1	0.69	0.23	0	0.21	0	0.35	0	0.3	NM_153368	0	0	0	0	0	0	0.4	0.28	NM_023158
CXADR	coxsackievirus and adenovirus receptor, transcript variant 1	0.46	0.23	0	0	0.21	0.17	0.19	0.15	NM_001338	0.75	0	0.27	0.23	0.11	0.1	0.54	0.57	NM_001025192
CXCL1	chemokine (C-X-C motif) ligand 1 (melanoma growth stimulating activity, alpha)	0.69	0	0	0	0	0	0	0.15	NM_001511	0	0	0	0	0	0	0	0	NM_008176
CXCL12	chemokine (C-X-C motif) ligand 12 (stromal cell-derived factor 1), transcript variant 2	0.23	0.23	0	0.63	0	0	0	0	NM_000609	0.19	0	0.27	0.12	0.23	0.1	0	0	NM_013655
CXCL12	chemokine (C-X-C motif) ligand 12 (stromal cell-derived factor 1), transcript variant 1	0.46	0.23	0	1.68	1.03	0	0	0	NM_199168	0	0.24	0.27	0	0.23	0	0	0	NM_021704
CXCL14	chemokine (C-X-C motif) ligand 14	0.23	3.91	3.5	1.05	0.41	1.56	0.38	0.15	NM_004887	0	0	0	0	0	0	0	0	NM_019568
CXCL2	chemokine (C-X-C motif) ligand 2	2.07	0	0	0.21	1.03	0.35	1.14	9.49	NM_002089	0	0	0	0	0	0	0	0	NM_009140
CXCL3	chemokine (C-X-C motif) ligand 3	0.46	0	0	0	0.41	0	0.19	0.75	NM_002090	0	0	0	0	0	0	0	0	NM_203320
CXXC5	CXXC finger 5	0.46	0.69	0	0.84	0.62	0.17	0.57	1.21	BC006428	0.37	1.43	0.4	1.51	1.48	1.57	3.36	1.56	NM_133687
CYB561	cytochrome b-561	0	0	0	0	0.21	0	0.19	0	NM_001915	0	0	0	0.12	0.23	0.1	0.27	0.85	NM_007805
CYB5B	cytochrome b5 type B	0.23	0	0	0	0	0	0	0.15	NM_030579	0.19	3.94	1.46	1.16	0.91	0.39	0.67	2.69	NM_025558
CYB5D2	Cytochrome b5 reductase 1	0	0	0.22	0.63	0.41	0	0.38	0.15	NM_144611	0	0	0.13	0.35	0.34	0.2	0.67	1.13	BC016266
CYB5R3	cytochrome b5 reductase 3	0.69	0	1.97	0.84	0.62	0.17	0.38	0.6	NM_000398	0.75	0.48	0.53	0.47	0.68	0.39	0.67	1.28	NM_029787
CYBA	cytochrome b-245, alpha polypeptide	2.52	6.89	5.69	0.63	0.83	1.38	2.09	1.36	NM_000101	1.68	2.27	2.12	0	0.11	0	0	0.14	NM_007806
CYBASC3	cytochrome b, ascorbate dependent 3	0	0	0	0	0.21	0	0	0	NM_153611	0	0	0	0	0	0	0	0.43	NM_201351
CYBRD1	cytochrome b reductase 1	0	0	0	0	0	0	0.38	0	NM_024843	0	0	0	0	0	0	0	0	NM_028593
CYFIP2	cytoplasmic FMR1 interacting protein 2	0	0.23	0	0.63	2.48	0.17	0.19	0.15	NM_001037333	0	0.12	0	3.72	4.44	0.98	1.08	1.13	NM_133769
CYHR1	Cysteine/histidine-rich 1	0.69	0.23	0	0.21	0.21	0.35	0.38	0.3	AB007965	0	0	0.13	0.23	0.23	0.1	0.54	0.28	NM_019396
CYHR1	cysteine and histidine rich 1, transcript variant 2	0.46	0.69	0	0.63	0.21	0.69	0.76	0.45	NM_032687	0.37	0.48	0.13	1.16	2.16	1.86	1.21	1.28	NM_180962
CYP17A1	cytochrome P450, family 17, subfamily A, polypeptide 1	0	0.46	1.09	0	0	0.17	0.38	0.3	NM_000102	0	0	0	0	0	0	0	0	NM_007809
CYP27A1	cytochrome P450, family 27, subfamily A, polypeptide 1, nuclear gene encoding mitochondrial protein	0.23	0.23	0.66	0	0	0.17	0.19	0.3	NM_000784	0	1.19	3.98	0	0	0	0	0	NM_009997
CYP2E1	cytochrome P450, family 2, subfamily e, polypeptide 1	0	0	0	0	0	0	0	0.3	NM_000773	0.75	28.39	4.51	0	0.11	1.27	0.13	0.28	NM_021282
CYP4B1	cytochrome P450, family 4, subfamily b, polypeptide 1	0	0	0	0	0	0	0	0	NM_001099772	5.42	18.97	16.07	0.35	0.23	1.18	0.13	0.28	NM_007823
CYP7B1	cytochrome P450, family 7, subfamily b, polypeptide 1	0	0	0	0	0	0	0	0	NM_004820	2.24	0.48	32.53	0.12	0.91	0	1.08	0.71	NM_007825
CYR61	cysteine-rich, angiogenic inducer, 61	0.92	0.46	1.09	2.31	1.65	1.04	0.38	3.01	NM_001554	0	0	0	0	0	0	0.13	0	NM_010516
CYS1	Cystin 1	0.46	1.38	1.75	4.63	8.88	3.63	3.8	2.26	AK091299	31.58	20.16	26.69	139.11	50.82	59.74	40.73	49.63	NC_005089.1 (14145..15288)
CYTB	mitochondrially encoded cytochrome b	3.44	35.38	83.97	66.48	27.46	46.2	23.56	15.07	NC_001807.4 (14748..15882)	31.58	20.16	26.69	139.11	50.82	59.74	40.73	49.63	NC005089
D2HGDH	D-2-hydroxyglutarate dehydrogenase, nuclear gene encoding mitochondrial protein	0	0.46	0.44	0	0.21	0.17	0.19	0.45	NM_152783	0	0	0.27	0.23	0.11	0	0.13	0.28	NM_178882
DAAM2	dishevelled associated activator of morphogenesis 2	0	0	0	0	0.21	0	0	0	NM_015345	0.19	0	0	0	0	0	0	0.43	NM_001008231
DAB1	disabled homolog 1 (Drosophila), transcript variant 2	0	0	0	0	0	0	0	0	NM_021080	0	0.12	0	0	0	0	0	0.43	NM_177259
DAB2	disabled homolog 2 (Drosophila), transcript variant 3	2.29	3.22	3.94	0.21	0.41	0.17	0.38	0.6	NM_001343	0.56	1.31	1.19	0.12	0.11	0	0.27	0.43	NM_001037905
DAB2IP	Disabled homolog 2 (Drosophila) interacting protein	0	0	0	0	0.21	0.17	0	0.45	NM_032552	1.12	0	0	0.12	0.57	3.62	0.67	0.43	AK147593
DAD1	defender against cell death 1	2.29	0.92	1.53	0.84	1.86	0.69	0.76	0.9	NM_001344	0	0	0	0	0	0	0	0	NM_010015
DAG1	dystroglycan 1 (dystrophin-associated glycoprotein 1)	0.69	0	0	0.42	0.41	0.17	0.38	0	NM_004393	0	0	0.13	0.23	0	0	0	0	NM_010017
DAGLB	Diacylglycerol lipase, beta	0	0	0.22	0	0.21	0	0	0	NM_139179	0	0.24	0.13	0.47	0.34	0.29	0.4	0.28	AK081509
DAK	dihydroxyacetone kinase 2 homolog (yeast)	0	0	0.44	0	0	0	0	0	NM_015533	0	2.74	1.73	0.23	0	0.2	0.13	0.14	NM_145496
DALRD3	DALR anticodon binding domain containing 3	0	0	0	0	0	0	0	0	NM_001009996	0.19	0.36	0.13	0.12	0	0.1	0.13	0.28	NM_026378
DAPK1	death-associated protein kinase 1	0.46	0	0	0.21	0.21	0	0.19	0.15	NM_004938	0.19	0.12	0	0.12	1.71	0.1	0.13	0	NM_134062
DARS	aspartyl-tRNA synthetase	0.92	1.15	0.66	0.84	0.41	0.69	0.57	0.6	NM_001349	1.12	0.24	0.66	0.35	0.46	0.1	0.13	0.14	NM_145507
DAZAP1	DAZ associated protein 1	0	0.46	0.22	0	0	0.52	0.38	0.45	NM_170711	0.37	0	0.13	0.35	0.11	0.59	0.94	0.85	NM_133188
DAZAP2	DAZ associated protein 2	0.69	1.84	1.31	0.84	0	1.21	0.95	0.9	NM_014764	0.93	0.36	0.93	0.23	0.57	0.2	0.4	0.99	NM_011873
DBNL	drebrin-like	0	0	0	0.21	0	0.35	0.57	0.9	NM_014063	0.37	0.36	0.13	0.35	0	0	0.27	0.28	NM_013810
DCAKD	dephospho-CoA kinase domain containing	0.23	0.23	0	0	0	0.35	19	0.15	NM_024819	0.19	0	0.13	0.23	0.23	0.2	0.54	0	NM_026551
DCBLD1	Discoidin, CUB and LCCL domain containing 1	0.69	0	0	0	0.21	0	0.57	0.45	CR749448	0	0	0.13	0	0	0.1	0	0	NM_025705
DCBLD2	discoidin, CUB and LCCL domain containing 2	0.23	0.23	0	0	0	0	0.19	0	NM_080927	0.19	0	0	0	0	0.1	0.27	0	NM_028523
DCDC2	doublecortin domain containing 2	0.46	0	0.22	0	0	0.17	0.19	0.15	NM_016356	0	0	0	0	0	0	0	0	NM_177577
DCK	deoxycytidine kinase	0.46	0	0	0	0.21	0	0.19	0	NM_000788	0	0	0	0	0	0	0	0	NM_007832
DCLK3	doublecortin-like kinase 3	0	0	0	0	0	0	0	0	NM_033403	0	0	0.13	0	0	0	0.27	0.85	NM_172928
DCTN1	dynactin 1	0	0	0	0.21	0	0.17	0	0.15	NM_004082	0.19	0	0	0.35	0	0	0.27	0.14	NM_007835
DCTN2	dynactin 2	0.46	0	0.22	0	0.83	0.52	0	0.3	NM_006400	0.37	0.84	1.19	1.28	1.48	0.88	2.15	0.99	NM_027151
DCTN3	Dynactin 3	0	0.46	0.22	0.42	0.21	0.69	0.19	0.15	NM_007234	0.19	1.43	0.4	0.23	0.46	0	0	0.71	BY703226
DCTN5	dynactin 5	0	0	0	0	0.21	0.35	0	0.15	NM_032486	0	0.12	0	0.12	0.34	0	0.67	0	NM_021608
DCTN6	dynactin 6	0.69	0	0	0.42	0.21	0.17	0.38	0.3	NM_006571	0.93	0.12	0	0.23	0.34	0.2	0.54	0.71	NM_011722
DCXR	dicarbonyl/L-xylulose reductase	0	3.45	7	0.84	1.03	1.9	0	1.36	NM_016286	0	1.19	0.13	0.12	0.34	0	0.13	0.14	NM_026428
DDAH1	dimethylarginine dimethylaminohydrolase 1	0	0.23	0.44	0	0.41	0.17	0	0.3	NM_012137	0	0.95	0.93	0.35	0	0.1	0	0.14	NM_026993
DDAH2	dimethylarginine dimethylaminohydrolase 2	1.38	0.92	0.87	1.26	1.24	1.04	1.71	2.26	NM_013974	0.37	0.12	0	0.12	0	0.1	0.13	0	NM_016765
DDB1	damage-specific DNA binding protein 1, 127kDa	0.69	1.84	0.87	1.68	1.86	0.52	2.85	1.21	NM_001923	0	0.12	0.27	1.16	0.8	0.29	1.88	0.85	NM_015735
DDB2	damage-specific DNA binding protein 2, 48kDa	0.23	0	0	0	0	0.17	0.38	0.3	NM_000107	0	0	0	0	0.11	0	0.13	0	NM_028119
DDC	dopa decarboxylase	0	1.84	1.09	0	0	0	0	0.15	NM_001082297	0	0.24	0.53	0	0	0.1	0.13	0	NM_016672
DDEF2	development and differentiation enhancing factor 2	0	0	0.44	0.42	0.62	0.69	0.76	0.6	NM_003887	0.93	0	0	0.23	0	0	0	0	NM_001004364
DDIT3	DNA-damage-inducible transcript 3	0	0	0.44	0	0.62	0.87	0.76	0.75	NM_004083	4.67	0.36	0.13	0.7	0.68	2.15	0.27	0.14	NM_007837
DDIT4	DNA-damage-inducible transcript 4	0.46	0	1.09	0.21	0.21	0	1.71	1.96	NM_019058	0	0	0	0.23	0.46	0	0.81	0.28	NM_029083
DDIT4L	DNA-damage-inducible transcript 4-like	0	0	0	0	0	0	0	0	NM_145244	0	0	0	0.35	0.34	0.1	0.27	0.14	NM_030143
DDN	dendrin	0.69	0	0	0	0	0	0	0	NM_015086	4.3	0	0	0	0	0	0	0	XM_619356
DDT	D-dopachrome tautomerase	0.69	3.32	1.53	1.05	0.41	1.73	1.52	1.21	NM_001355	0.37	0.95	0.93	0.47	0.11	0.2	0.67	0.43	NM_010027
DDX1	DEAD (Asp-Glu-Ala-Asp) box polypeptide 1	0.23	0.23	0.22	0.21	0	0	0.38	0.6	NM_004939	0.56	0.36	1.46	0.93	0.8	0.69	0.94	1.13	NM_134040
DDX23	DEAD (Asp-Glu-Ala-Asp) box polypeptide 23	0.46	0	0	0	0	0.17	0.38	0	NM_004818	0	0	0	0	0	0	0	0	NM_001080981
DDX24	DEAD (Asp-Glu-Ala-Asp) box polypeptide 24	0.46	0.69	0.22	0.21	1.03	0.17	0.19	0.6	NM_020414	2.24	0.12	0.13	0.23	0.23	0.2	0.54	0.28	NM_020494
DDX26B	DEAD/H (Asp-Glu-Ala-Asp/His) box polypeptide 26B	0	0	0	0	0	0	0	0	NM_182540	0	0	0	0	0.23	0.1	0.4	0.28	NM_172779
DDX39	DEAD (Asp-Glu-Ala-Asp) box polypeptide 39	0.46	1.15	0.44	0	0	0	0.57	0.3	NM_005804	0	0	0	0.35	0.11	0.2	0.4	0.28	NM_197982
DDX3X	DEAD (Asp-Glu-Ala-Asp) box polypeptide 3, X-linked	1.15	0.23	0.44	0.84	1.86	0.35	0.19	0.75	NM_001356	0.37	0.48	0.27	0.23	0.23	0.29	0.67	0.57	NM_010028
DDX3Y	DEAD (Asp-Glu-Ala-Asp) box polypeptide 3, Y-linked	1.15	0	0	0.21	0	0.17	0.19	0.6	NM_004660	0	0	0	0	0	0.1	0	0	NM_012008
DDX41	DEAD (Asp-Glu-Ala-Asp) box polypeptide 41	0.23	0.46	0.22	0	0	0	0.38	0.6	NM_016222	0	0.12	0.4	0.58	0.46	0.2	0.54	0.28	NM_134059
DDX42	DEAD (Asp-Glu-Ala-Asp) box polypeptide 42	0.46	0.23	0	0	0.21	0	0.19	0.15	NM_007372	0	0.24	0	0.23	0.46	0.1	0.4	0.43	NM_028074
DDX47	DEAD (Asp-Glu-Ala-Asp) box polypeptide 47	0	0	0.22	0.21	0.21	0.52	0	0.15	NM_016355	0	0	0	0.12	0.34	0	0	0.43	NM_026360
DDX49	DEAD (Asp-Glu-Ala-Asp) box polypeptide 49	0	0	0.44	0	0.21	0.17	0.57	0.15	NM_019070	0	0	0	0	0.11	0	0.13	0	NM_001024922
DDX5	DEAD (Asp-Glu-Ala-Asp) box polypeptide 5	2.52	0.46	0.44	0.21	0.83	1.21	1.71	0.6	NM_004396	1.68	0.72	0.27	1.98	1.6	0.69	1.61	1.28	NM_007840
DDX50	DEAD (Asp-Glu-Ala-Asp) box polypeptide 50	0.23	0.23	0.22	0	0	0.52	0.19	0.45	NM_024045	0.19	0.36	0	0.35	0	0	0.27	0	NM_053183
DDX51	DEAD (Asp-Glu-Ala-Asp) box polypeptide 51	0	0	0	0	0.21	0	0.38	0.15	NM_175066	0	0	0	0	0	0	0	0	NM_027156
DDX54	DEAD (Asp-Glu-Ala-Asp) box polypeptide 54	0	0	0	0.42	0	0	0.19	0.15	NM_024072	0.19	0.48	0.4	0.81	0.91	0.49	0.27	0.99	BC062920
DECR1	2,4-dienoyl CoA reductase 1, mitochondrial, nuclear gene encoding mitochondrial protein	0.23	0.46	0.66	0.63	2.06	0.87	0.76	0.75	NM_001359	0	0.36	0.27	0	0.11	0	0	0	NM_026172
DECR2	2,4-dienoyl CoA reductase 2, peroxisomal	0	0.69	0.44	0	0	0	0	0	AK055839	0.75	0.6	0.13	0.12	0.11	0.1	0.13	0.57	NM_011933
DEFB1	defensin, beta 1	0.46	1.84	0.66	6.73	9.91	39.45	3.42	2.41	NM_005218	2.8	0	0	3.02	3.65	42.31	15.86	13.33	NM_007843
DEFB1	Defensin beta 1	0.46	1.84	0.66	6.73	9.91	39.45	3.42	2.41	NM_005218	0.75	0	0	0.58	0.46	2.35	1.21	2.13	DV039530
DEGS2	degenerative spermatocyte homolog 2 (Drosophila), lipid desaturase	0	0	0	0.42	0	0	0	0.75	NM_206918	0	0.95	0.4	0	0	0.39	3.36	1.99	NM_027299
DEK	DEK oncogene (DNA binding)	0.23	0.23	0.22	0.21	0.21	0.35	0.95	0.45	NM_003472	0.75	0.24	0.13	0.81	0.68	0.49	0.94	0.99	NM_025900
DENND1A	DENN/MADD domain containing 1A, transcript variant 2	0.23	0.46	0	1.05	0	0.52	0.95	0.6	NM_024820	0	0.24	0.4	0	0	0	0	0.14	NM_146122
DEPDC6	DEP domain containing 6, transcript variant 1	0	0.23	0	0.21	0	0	0.19	0	NM_022783	0	0.24	0	0.35	0.8	0.1	0.4	0.14	NM_145470
DEPDC7	DEP domain containing 7	0	0	0	0	0	0	0	0	NM_001077242	0	0.48	0.13	0	0	0.29	0.67	0	NM_144804
DERA	2-deoxyribose-5-phosphate aldolase homolog (C. elegans)	0	0.46	0	0	0	0.17	0.19	0	NM_015954	0	0.36	0.4	0.23	0	0.1	0	0	NM_172733
DERL1	Der1-like domain family, member 1	0.23	0.23	0	0	0.83	0.17	0.19	0.3	NM_024295	0	0	0	0	0	0	0	0	NM_024207
DEXI	dexamethasone-induced transcript	0	0.92	0.22	0.21	0.41	0	0.57	0.3	NM_014015	0	0.24	0.13	0.23	0.34	0	0	0.28	NM_021478
DGAT2	diacylglycerol O-acyltransferase 2	0	0	0	0	0	0	0	0	NM_032564	0	0.24	0.8	0	0.11	0.1	0	0	NM_026384
DGCR2	DiGeorge syndrome critical region gene 2	0	0	0	0	0	0	0.76	0.3	NM_005137	0.93	0.12	0	0	0	0	0.4	0.14	NM_010048
DGCR6	DiGeorge syndrome critical region gene 6	0	0	0	0	0.21	0.35	0	0	NM_005675	1.12	0.72	0.4	0.58	1.82	0.98	0.4	0.57	NM_010047
DGKQ	diacylglycerol kinase, theta	0	0	0	0	0	0	0	0	NM_001347	0	1.91	0.53	0	0.23	0.29	0.13	0.43	NM_199011
DHCR24	24-dehydrocholesterol reductase	0	0	0	0	0	0	0	0	NM_014762	0	0.48	0.4	0.12	0.11	0.2	0.27	0.28	NM_053272
DHCR7	7-dehydrocholesterol reductase	0.23	0	0.22	0.21	0.21	0.17	0.19	0	NM_001360	0	0.36	0.8	0.35	1.14	0.78	0	0.14	NM_007856
DHDDS	dehydrodolichyl diphosphate synthase	0	0	0.22	0	0.62	0	0.19	0	NM_024887	0.37	0.36	0	0.23	0.23	0.2	0.54	0.14	NM_026144
DHODH	dihydroorotate dehydrogenase, nuclear gene encoding mitochondrial protein	0	0.69	0	0	0	0	0	0	NM_001361	0	0	0	0.12	0.34	0.1	0.4	0	NM_020046
DHPS	deoxyhypusine synthase	0.23	0.46	0	0.21	0.17	0	0.76	0.45	NM_001930	0.19	0	0.13	0.12	0	0.78	1.21	0.14	NM_001039514
DHRS1	dehydrogenase/reductase (SDR family) member 1	0	0.23	0	0	0	0	0	0	NM_138452	0	0.24	1.33	0.12	0.34	0	0.27	0.85	NM_026819
DHRS13	dehydrogenase/reductase (SDR family) member 13	0	0.23	0.22	0	0.21	0.17	0.19	0.3	NM_144683	0.93	0.12	0	0	0.11	0.2	0.54	0	NM_183286
DHRS3	dehydrogenase/reductase (SDR family) member 3	0.46	0.23	0.22	0	0	0.17	0	0.45	NM_004753	0	0	0	0	0	0	0	0	NM_011303
DHRS7	dehydrogenase/reductase (SDR family) member 7	0.23	0.23	0	0	0	0.69	0.38	0.6	NM_016029	0	0	0	0	0	0	0.27	0	NM_025522
DHRS7B	dehydrogenase/reductase (SDR family) member 7B	0	0.46	0.44	0	1.03	0	0.57	0.3	NM_015510	0.93	0.12	0.53	0.47	0.91	2.15	0.4	0.28	NM_145428
DHTKD1	dehydrogenase E1 and transketolase domain containing 1	0	0.46	0.22	0.21	0	0	0	0	NM_018706	0	0	0.13	0	0	0	0	0	NM_001081131
DHX15	DEAH (Asp-Glu-Ala-His) box polypeptide 15	0.92	0.23	0.22	0.42	0.62	0.17	0.38	0.3	NM_001358	0.19	0.48	0.53	0.58	0.8	0.29	0.27	0.57	NM_007839
DHX16	DEAH (Asp-Glu-Ala-His) box polypeptide 16	0.23	0	0.22	0	0	0.35	0.38	0	BC008825	0.56	0	0	0	0.23	0.1	0.13	0	NM_026987
DHX30	DEAH (Asp-Glu-Ala-His) box polypeptide 30	0.23	0.23	0.22	0.21	0.21	0.35	0.57	0.3	NM_138615	0	0	0.13	0	0.34	0.1	0.67	0.28	NM_133347
DHX32	DEAH (Asp-Glu-Ala-His) box polypeptide 32	0	0	0.22	0	0	0	0.19	0.15	NM_018180	0.37	0	0.13	0.23	0	0.29	0.27	0	NM_133941
DHX35	DEAH (Asp-Glu-Ala-His) box polypeptide 35	0	0	0	0	0	0	0	0	NM_021931	0	0	0.13	0	0.11	0.1	0.54	0.14	NM_145742
DHX57	DEAH (Asp-Glu-Ala-Asp/His) box polypeptide 57	0	0	0	0	0	0	0	0	NM_198963	0	0	0.27	0.12	0	0	0.4	0	NM_198942
DHX8	DEAH (Asp-Glu-Ala-His) box polypeptide 8	0.46	0	0	0.21	0.21	0	0.19	0	NM_004941	0.56	0.12	0	0.47	0.23	0.2	0.54	0	NM_144831
DHX9	DEAH (Asp-Glu-Ala-His) box polypeptide 9	1.38	0.92	0	0	0	0.17	0	0.45	NM_001357	0	0	0	0	0	0	0.13	0	NM_007842
DIP2C	DIP2 disco-interacting protein 2 homolog C (Drosophila)	0	0.22	0	0	0	0	0.19	0	NM_014974	0.37	0	0	0	0.23	0.29	1.61	0.14	NM_001081426
DIRC2	disrupted in renal carcinoma 2	0	0	0	0	0.21	0	0.38	0	NM_032839	0.37	0.12	0.27	0	0.11	0.29	0.13	0.28	NM_153530
DKC1	dyskeratosis congenita 1, dyskerin homolog (human)	0	0	0	0	0	0	0	0.15	NM_001363	0	0	0	0	0.11	0	0.27	0	NM_001030307
DKK3	dickkopf homolog 3 (Xenopus laevis)	0.23	0	0	0	0	0	0	0	NM_015881	0.56	0	0	0	0	0	0.13	0	NM_015814
DLAT	dihydrolipoamide S-acetyltransferase (E2 component of pyruvate dehydrogenase complex)	0.23	0	0	0	0	0	0	0.15	NM_001931	0	0	0	0.35	0.34	0.59	0.27	0	NM_145614
DLG1	discs, large homolog 1 (Drosophila)	0	0	0	0	0	0	0	0	NM_001098424	0.56	0	0.13	0.58	0	0	0.54	1.7	NM_007862
DLL1	delta-like 1 (Drosophila)	0	0	0.22	0	0.21	0.17	0	0	NM_005618	0	0	0	0	0	0	0.94	0.14	NM_007865
DLST	dihydrolipoamide S-succinyltransferase (E2 component of 2-oxo-glutarate complex)	0.23	0.46	0.22	0.42	0	0.69	0.57	0.45	NM_001933	0.19	0.6	0.27	0.58	1.03	0.49	0.54	0	NM_030225
DMGDH	dimethylglycine dehydrogenase, nuclear gene encoding mitochondrial protein	0	0.46	0.44	0.21	0	0	0.19	0.15	NM_013391	0	0.6	1.46	0	0	0	0	0	NM_028772
DMTF1	cyclin D binding myb-like transcription factor 1	0	0	0	0.63	0.21	0.17	0.19	0.15	NM_021145	0	0.12	0.13	0	0	0	0.27	0.28	NM_011806
DMWD	dystrophia myotonica-containing WD repeat motif	0	0	0	0	0.21	0	0.19	0	NM_004943	0.37	0	0	0	0.23	0.1	0.13	0.43	NM_010058
DNAJA1	DnaJ (Hsp40) homolog, subfamily A, member 1	0.92	0.46	0.44	0	0.83	0.87	1.33	0.6	NM_001539	0	0	0	0	0.11	0	0.4	0	NM_019794
DNAJA4	DnaJ (Hsp40) homolog, subfamily A, member 4	0.23	0	0	0.21	0.21	0	0.57	0	NM_018602	0	0.12	0.13	0	0	0.1	0	0.14	NM_021422
DNAJB1	DnaJ (Hsp40) homolog, subfamily B, member 1	0	0.23	0.22	0	0.62	0.17	0.19	0.6	NM_006145	0.37	0.72	0.53	0.23	0.68	0.49	1.21	0.57	NM_018808
DNAJB4	DnaJ (Hsp40) homolog, subfamily B, member 4	0	0	0.22	0	41	0.35	0	0	NM_007034	0	0.24	0	0.12	0	0	0	0.85	NM_025926
DNAJB9	DnaJ (Hsp40) homolog, subfamily B, member 9	0.46	0	0.22	0	0.41	0	0.19	0	NM_012328	0.19	0	0	0.23	0.34	0.88	0.94	0.28	NM_013760
DNAJB9	DnaJ (Hsp40) homolog, subfamily B, member 9	0	0.46	0.22	0	0.41	0	0.19	0	NM_012328	0.19	0	0	0.23	0.34	0.88	0.94	0.28	NM_013760
DNAJC1	DnaJ (Hsp40) homolog, subfamily C, member 1	0.23	0	0	0	0	0	0	0.15	NM_022365	0.37	0	0.13	0.23	0.11	0	0.13	0	NM_007869
DNAJC11	DnaJ (Hsp40) homolog, subfamily C, member 11	0.46	0.23	0	0.63	0	0.52	0.38	0	NM_018198	0	0	0	0.12	0	0	0	0	NM_172704
DNAJC12	DnaJ (Hsp40) homolog, subfamily C, member 12	0	0.23	0	0	0	0	0	0	NM_021800	0.56	2.98	1.06	0.23	0	0	0	0	NM_013888
DNAJC14	DnaJ (Hsp40) homolog, subfamily C, member 14	0	0	0	0.21	0	0.35	0	0	NM_021800	0	0	0	0.23	0	0	0.54	0.43	NM_028873
DNAJC15	DnaJ (Hsp40) homolog, subfamily C, member 15	0.23	0	0	0	0.21	0	0.19	0.15	NM_013238	0	0.84	1.33	0.7	1.94	0.29	0.81	0.57	NM_025384
DNAJC17	DnaJ (Hsp40) homolog, subfamily C, member 17	0.23	0.23	0.44	0.21	0	0.17	0	0.45	NM_018163	0	0	0.13	0	0	0.39	0	0	NM_139139
DNAJC19	DnaJ (Hsp40) homolog, subfamily C, member 19, transcript variant 1	0	0	0.44	0.84	0.41	0.17	0.38	0.45	NM_145261	0	7.75	4.78	1.05	1.14	0.69	0.54	1.13	NM_026332
DNAJC5	DnaJ (Hsp40) homolog, subfamily C, member 5	0.23	0	0.22	0	0.41	0.17	0.19	0.45	CR627461	0.19	0	0	0.12	0	0	0.27	0.28	NM_016775
DNAJC8	DnaJ (Hsp40) homolog, subfamily C, member 8	0.23	0.23	0.22	0.42	0	0.17	0.19	0.15	NM_014280	1.12	0	0.27	0.47	0.46	2.84	2.02	0.99	NM_172400
DNAJC9	DnaJ (Hsp40) homolog, subfamily C, member 9	0.23	0	0.22	0.63	0	0	0.19	0.15	NM_015190	0.56	0	0	0.12	0.11	0	0	0.14	NM_134081
DNASE1	deoxyribonuclease I	0	0	0	42	1.03	0.87	0	0	NM_005223	1.31	7.4	0.66	0.12	0.23	0.1	0	0.14	NM_010061
DNM2	dynamin 2	0.23	0	0.22	0.21	0.41	0.52	0.19	0.6	NM_001005360	0	0.12	0	0.47	0.46	0.29	0.13	0.28	NM_001039520
DNMT1	DNA methyltransferase (cytosine-5) 1	0.23	0.23	0	0	0	0	0	0.15	NM_001379	1.31	0.24	0.13	0	0.23	0.1	0.4	0.14	NM_010066
DNTTIP1	deoxynucleotidyltransferase, terminal, interacting protein 1	0	0.23	0.22	0.63	0.41	0.35	0.19	0.45	NM_052951	0	0	0.13	0.12	0	0	0	0.28	NM_133763
DOCK1	dedicator of cyto-kinesis 1	0.23	0	0.22	0	0	0	0	0.3	NM_001380	0.19	0.36	0	0.23	0	0.1	0.13	0.43	NM_001033420
DOCK10	dedicator of cytokinesis 10	0.46	0	0	0	0	0	0.19	0	NM_014689	0	0	0	0	0	0	0	0	XM_891407
DOCK6	dedicator of cytokinesis 6	0	0.23	0	0	0.21	0.17	0	0.15	NM_020812	1.12	0	0.13	0.23	0.68	0.88	0.67	0.14	NM_177030
DOCK7	dedicator of cytokinesis 7	0.23	0	0	0	0	0.17	0	0.15	NM_033407	0.19	0	0.13	0	0.23	0.2	1.08	0.14	NM_026082
DOCK8	dedicator of cytokinesis 8	0.23	0	0	0	0	0.17	0	0.15	NM_203447	1.87	0.48	0.93	1.51	1.71	0.88	0.54	0.85	NM_028785
DOCK9	dedicator of cytokinesis 9	0	0	0	0.21	0.21	0	0	0	NM_015296	0	0	0.8	0	0.23	0	0.13	0	NM_001081039
DOHH	deoxyhypusine hydroxylase/monooxygenase	0	0.23	0.22	0	0.21	0.17	0.38	0	NM_031304	0	0.24	0.13	0.47	1.03	1.96	1.34	0.14	NM_133964
DOLK	dolichol kinase	0	0.23	0	0	0	0	0.19	0	NM_014908	0	0	0.4	0	0	0.39	0.54	0.14	NM_177648
DOLPP1	dolichyl pyrophosphate phosphatase 1	0	0	0	0.42	0	0	0	0	NM_020438	0.37	0.12	0	0	0.11	0.29	0.27	0.71	NM_020329
DOM3Z	DOM-3 homolog Z (C. elegans)	0	0	0	0	0	0	0	0	NM_005510	1.5	0	0.4	0	0.34	0	0.4	0.14	NM_033613
DPEP1	dipeptidase 1 (renal)	0	6.2	1.31	0	0	0.35	0.19	0.15	NM_004413	0	0.48	0	0	0	0	0	0	NM_007876
DPF2	D4, zinc and double PHD fingers family 2	0.46	0	0	0	0.41	0.17	0.19	0.15	NM_006268	0	0	0	0.12	0	0	0.27	0.28	NM_011262
DPM1	dolichyl-phosphate mannosyltransferase polypeptide 1, catalytic subunit	0.46	0.23	0	0.21	0.83	0.69	0.57	0.45	NM_003859	0	0	0	0	0.11	0	0	0	NM_010072
DPP3	dipeptidylpeptidase 3	0	0	0	0	0.21	0.35	0.76	0.15	NM_005700	0	0.36	0	0	0.34	0.2	0.4	0.71	NM_133803
DPP7	dipeptidyl-peptidase 7	0.46	0.46	0.66	0.63	0.41	0.69	0.95	1.05	NM_013379	0	0.84	0.4	0.12	0	0.1	0	0	NM_031843
DPP8	Dipeptidylpeptidase 8	0	0	0	0	0.21	0.17	0.19	0.15	NM_130434	0	0.12	0.53	0.23	0.34	0.1	0.27	0.43	AK009140
DPY19L1	Dpy-19-like 1	0	0	0	0	0.41	0.17	0	0	NM_015283	0	0	0	0	0	0	0	0.43	BE949451
DPY19L4	dpy-19-like 4 (C. elegans)	0.46	0	0	0	0	0	0	0	NM_181787	0	0	0	0	0	0.1	0	0	NM_001081201
DPYSL3	dihydropyrimidinase-like 3	0.46	0	0	0	0	0	0	0	NM_001387	0	0	0	0	0	0	0	0	NM_009468
DRAP1	DR1-associated protein 1 (negative cofactor 2 alpha)	0.46	0	0.22	0	0.21	0.52	0.57	0.15	NM_006442	0.19	1.07	0.4	0.81	0.46	0.39	0.4	1.56	NM_024176
DRG1	developmentally regulated GTP binding protein 1	2.29	0.92	1.31	0.63	1.45	1.21	1.33	1.05	NM_004147	0	0	0	0	0	0	0	0	NM_007879
DSEL	dermatan sulfate epimerase-like	0	0.69	0	0	0	0	0	0	NM_032160	0	0	0	0	0	0	0	0	NM_001081316
DTD1	D-tyrosyl-tRNA deacylase 1 homolog (S. cerevisiae)	0	0	0	0	0	0.17	0	0.15	NM_080820	0.19	0.12	0.13	0.23	0.34	0.1	0.54	0.57	NM_025314
DTWD2	destrin	0.69	0.23	0.22	0.42	1.24	0.35	0.57	0.6	NM_173666	1.12	1.07	0.8	0.7	0.91	0.2	0.54	0.85	NM_019771
DTX3	deltex 3 homolog (Drosophila)	0.23	0	0.22	0	0	0	0.38	0.15	NM_178502	0.75	0	0	0	0	0.1	0	0.14	NM_030714
DULLARD	Dullard homolog (Xenopus laevis)	0.69	0.46	0.44	0.21	0.41	0.17	0.76	0.6	NM_015343	0.93	0.24	0.4	0.58	0.23	0.1	0.67	0.43	NM_026017
DUS1L	dihydrouridine synthase 1-like (S. cerevisiae)	0	0	0.66	0.21	0.41	0.17	0	0.15	NM_022156	0.75	0.12	0.27	0.12	0.34	0.88	0.27	0.28	NM_026824
DUSP1	dual specificity phosphatase 1	5.51	0.23	0.87	0.42	1.65	1.56	3.99	3.47	NM_004417	0	0.72	0.13	0.47	0.11	0	0	0.43	NM_013642
DUSP11	dual specificity phosphatase 11 (RNA/RNP complex 1-interacting)	0	0	0	0.21	0	0	0	0	NM_003584	0.93	0.12	0.27	0.7	1.03	0.49	0.67	0.14	NM_028099
DUSP14	dual specificity phosphatase 14	0	0	0	0	0.21	0	0	0	NM_007026	0	0.24	0.4	0.12	0	0	0	0.14	NM_019819
DUSP2	dual specificity phosphatase 2	0.23	0	0	0	0	0	1.33	0.6	NM_004418	0	0	0	0.12	0	0	0.13	0	NM_010090
DUSP22	dual specificity phosphatase 22, transcript variant 2	0	0	0	0	0	0	0	0	NM_020185	0	0.95	0.4	0.12	0	0.1	0	0.57	NM_134068
DUSP23	dual specificity phosphatase 23	0	0.92	0.66	0.21	0.21	0.17	1.52	0	NM_017823	0	0.12	0	0	0	0	0	0	NM_026725
DUSP26	dual specificity phosphatase 26 (putative)	0.23	0	0	0.84	0.62	0.35	0.95	1.05	NM_024025	0	0	0	0	0	0	0	0	NM_025869
DUSP3	Dual specificity phosphatase 3 (vaccinia virus phosphatase VH1-related)	0	0.23	0	0	0	0	0	0.3	NM_004090	0	0.12	0	0.12	0.11	0.1	0.27	0.14	AK077266
DUSP5	dishevelled, dsh homolog 1 (Drosophila)	0.92	0	0	0	0	0.17	0	0.45	NM_004419	1.12	0.24	0.13	1.16	0.23	0.98	2.02	2.55	NM_010091
DUSP7	Dishevelled, dsh homolog 1	0	0.46	0.22	0	0	0	0	0	NM_001947	0	0.36	0.4	1.74	0.23	0.98	1.21	1.28	AK220168
DYNC1H1	dynein cytoplasmic 1 heavy chain 1	0.69	0.23	0.44	0.21	0.62	0.17	0.19	0.3	NM_001376	1.68	0.24	0.13	0.7	0.68	1.08	1.88	0.71	NM_030238
DYNC1I2	dynein, cytoplasmic 1, intermediate chain 2	0.46	0	0	0	0	0	0.76	0.3	NM_001378	0	0.24	0.13	0.12	0	0	0.54	0.14	NM_010064
DYNC2H1	dynein cytoplasmic 2 heavy chain 1	0	0	0.44	0	0.21	0	0.19	0	NM_001080463	0.56	0	0.13	0.12	0.11	0.1	0.54	0.28	NM_029851
DYNC2LI1	dynein, cytoplasmic 2, light intermediate chain 1, transcript variant 1	0.46	0	0.44	0	0	0.35	0	0.6	NM_016008	0	0.12	0.27	0	0.46	1.27	0.81	0.57	NM_172256
DYNLL1	dynein light chain LC8-type 1	3.44	1.15	0.44	0.84	0.62	0.52	0.19	0.75	NM_001037494	2.62	0.24	0	0.23	1.03	0.39	1.34	2.13	NM_019682
DYNLL2	Dynein, light chain, LC8-type 2	0.46	0	0	0.21	0	0.35	0.76	0.3	BM476699	3.18	1.79	1.33	1.74	3.08	0.98	1.48	3.97	NM_026556
DYNLRB1	dynein, light chain, roadblock-type 1	0.69	0.92	0.44	0.63	0.21	0.69	0	1.05	NM_014183	5.23	1.67	0.93	2.09	3.3	1.37	3.63	2.13	NM_025947
DYNLT3	dynein, light chain, Tctex-type 3	0.69	0	0	0	0	0	0	0.3	NM_006520	0	0.24	0.13	0.23	0.46	0.2	0.13	0.28	NM_025975
DYRK1A	Dual-specificity tyrosine-(Y)-phosphorylation regulated kinase 1a	0.46	0	0	0	0	0	0.76	0	NM_001396	0	0	0	0.35	0	0	0.27	0.14	BC034550
DYSF	dysferlin, limb girdle muscular dystrophy 2B (autosomal recessive)	1.15	0.46	0.22	0	0	0.17	0.19	0.15	NM_003494	0.56	0	0	0.12	0.11	0	0.13	0	NM_021469
E2F4	E2F transcription factor 4, p107/p130-binding	0	0	0.22	0.21	0.41	0.17	0.19	0.15	NM_001950	0.75	0	0	0	0.57	0.2	0.13	0.43	NM_148952
E2F5	E2F transcription factor 5	0.46	0.46	0	0.21	0	0	0.19	0.6	NM_001951	0	0.24	0.4	0.47	0.57	0.59	0.54	0.71	NM_007892
EAF1	ELL associated factor 1	0.46	0.46	0.22	0	0	0.17	0.19	0	NM_033083	0	0.24	0.4	0.12	0.11	0.1	0.94	0.14	NM_028932
EAF1	ELL associated factor 1	0.46	0.46	0.22	0	0	0.17	0.19	0	NM_033083	0.37	0.24	0	0.12	0.57	0.2	0.81	0.71	NM_007893
EAF2	ELL associated factor 2	0	0	0	0	0	0	0	0	NM_018456	0.19	0.24	0.27	0.7	0.91	0.2	0.13	0.14	NM_134111
EAPP	E2F-associated phosphoprotein	0	0	0.22	0	0	0	0	0.45	NM_018453	0.19	0.48	0.4	0.23	0.46	0.39	0.54	0.28	NM_025456
EARS2	glutamyl-tRNA synthetase 2 (mitochondrial) (putative)	0	0	0.22	0	0	0	0	0	NM_001083614	0	0.12	0	0	0	0.29	0.27	0	NM_026140
EBAG9	estrogen receptor-binding fragment-associated gene 9	0	0.46	0	0.21	0.62	1.04	0.38	0.45	NM_004215	0	0.95	0.27	0	0.34	0	0.13	0	NM_019480
EBNA1BP2	EBNA1 binding protein 2	0.23	1.38	1.09	0.21	0.41	0.35	0.38	0.45	NM_006824	0	0	0	0	0	0	0	0	NM_026932
EBP	phenylalkylamine Ca2+ antagonist (emopamil) binding protein	0.23	1.38	0.66	0.42	0.62	0.52	0	0.6	NM_006579	0	0.24	0.8	0.35	0.34	0.2	0.81	0.14	NM_007898
ECD	ecdysoneless homolog (Drosophila)	0	0	0.22	0	0	0.17	0.38	0.3	NM_007265	0.19	0.84	0.13	0.23	0.57	0.2	0.4	1.42	NM_027475
ECE1	endothelin converting enzyme 1	0	0	0	0	0	0	0	0	NM_001397	0	0	0	0.47	0.23	0	0.13	0.28	NM_199307
ECE2	endothelin converting enzyme 2, transcript variant 3	0.46	0.46	0	0	0.21	0.35	0	0	NM_032331	0	0.36	0.4	0.12	0.23	0.2	0.27	0.14	NM_025462
ECH1	enoyl Coenzyme A hydratase 1, peroxisomal	1.38	1.15	3.94	1.89	1.45	0.87	1.14	1.51	NM_001398	3.18	4.29	5.31	3.72	4.9	3.43	3.5	2.98	NM_016772
ECHDC2	Enoyl Coenzyme A hydratase domain containing 2	0.23	0.23	0.44	0	0.21	0	0	0.3	BC051887	0.56	1.43	0.8	0.12	0.34	0	0	0.14	NM_026728
ECHDC2	enoyl Coenzyme A hydratase domain containing 2	0.69	2.76	0.87	2.1	0.41	0.87	0.19	0.6	NM_018281	0.56	1.43	0.8	0.12	0.34	0	0	0.14	NM_026728
ECHS1	enoyl Coenzyme A hydratase, short chain, 1, mitochondrial, nuclear gene encoding mitochondrial protein	0.69	2.99	4.81	0.63	0.41	0.52	1.14	0.9	NM_004092	0	0.24	0.13	0.58	1.37	1.76	1.08	0.28	NM_053119
ECM1	extracellular matrix protein 1	0	0	0	0	0	0	0	0	NM_004425	0	0	0	0.23	0	0	0.27	0	NM_007899
ECSIT	ECSIT homolog (Drosophila)	0.46	0.23	0.44	0	0.21	0.69	0.19	0	NM_016581	0	0	0	0.35	0.91	0.29	0	0.28	NM_012029
EDC4	enhancer of mRNA decapping 4	0	0.69	0	0	0.41	0	0.38	0	NM_014329	0	0	0.13	0.12	0.23	0.1	0.27	0	NM_181594
EDEM2	ER degradation enhancer, mannosidase alpha-like 2	0	0	0	0	0.83	0	0.19	0.3	NM_018217	0.19	0.24	0.4	0.12	0.23	0.1	0.27	0.57	NM_145537
EDF1	endothelial differentiation-related factor 1, transcript variant beta	0.46	0.69	0.44	0.63	1.65	0.35	0.76	0.15	NM_153200	5.23	3.46	3.32	4.54	5.36	10.77	5.24	2.27	NM_021519
EDF1	endothelial differentiation-related factor 1, transcript variant alpha	1.15	0.92	0.87	0.42	1.03	1.56	1.33	2.41	NM_003792	5.23	3.46	3.32	4.54	5.36	10.77	5.24	2.27	NM_021519
EDG1	endothelial differentiation, sphingolipid G-protein-coupled receptor, 1	1.84	0	0	0	0	0.17	0	0	NM_001400	1.31	0.12	0	0	0.11	0.1	0	0	NM_007901
EDG3	endothelial differentiation, sphingolipid G-protein-coupled receptor, 3	0.69	0.69	0.44	0.84	0.21	0.17	0.76	1.05	NM_005226	0	0	0	0	0	0	0	0	NM_010101
EDN1	endothelin 1	0.46	0	0	0	0.21	0.17	0	0.15	NM_001955	0	0	0	0.12	0	0.1	0	0	NM_010104
EDN3	endothelin 3	0	0	0	0.21	0	0	0	0	NM_004425	0	0	0	0	0	0	0	0.43	NM_007903
EEF1A1	eukaryotic translation elongation factor 1 alpha 1	0	0	0.22	0	0	0.17	0	0	NM_001402	8.78	3.7	12.22	3.49	5.7	21.06	10.22	8.93	NM_010106
EEF1G	eukaryotic translation elongation factor 1 gamma	4.59	10.57	5.69	6.31	3.92	7.96	4.94	7.53	NM_001404	2.43	3.22	2.66	2.09	4.33	0.88	3.23	2.69	NM_026007
EFHA1	EF hand domain family A1	0.92	0	0	0	0.83	0.35	0.38	0.15	NM_152726	0.37	0.84	0.4	0	0.11	0.1	0.4	0.57	NM_028643
EFHD1	EF hand domain containing 1	0	0.23	0.44	2.73	2.48	1.38	0.57	0.6	NM_025202	0.93	0	0	1.74	0.91	0	1.08	2.98	NM_028889
EFNB1	ephrin-B1	0.69	0	0	0.21	0	0	0	0	NM_004429	0.93	0	0	0.12	0.34	0.2	0.27	0.57	NM_010110
EFNB2	ephrin-B2	0.46	0	0	0.21	0	0.17	0	0	NM_004093	0.93	0.12	0	0	0.11	0.2	1.61	0.71	NM_010111
EFTUD2	elongation factor Tu GTP binding domain containing 2	0	0	0	0	0.21	0.17	0.19	0.45	NM_004247	0	0.24	0.13	0	0	0	0.27	0.57	NM_011431
EGF	epidermal growth factor	0	0	0	5.26	1.86	1.04	0	0	NM_001963	2.62	0.12	0	11.86	24.84	6.46	0.13	0.14	NM_010113
EGFL8	EGF-like-domain, multiple 8	0.69	0	0.22	0.42	0	0.17	0.38	1.05	NM_030652	0	0	0	0.23	0	0	0	0.14	NM_152922
EGFR	epidermal growth factor receptor (erythroblastic leukemia viral ((v-erb-b) oncogene homolog, avian), transcript variant 1	0.23	0.23	0	0	0.62	0.17	0.19	0.15	NM_005228	0	0	0.13	0	0	0	0.13	0.28	NM_207655
EGLN1	EGL nine homolog 1 (C. elegans)	0	0	0.22	0	0	0.17	0	0	NM_022051	0	0	0.13	0.23	0.23	0.1	0.27	0.28	NM_053207
EGLN2	EGL nine homolog 2 (C. elegans)	0	0.23	0.44	0	0.21	0	0.19	0.45	NM_053046	2.99	0.36	0.27	0.47	0.57	0.2	1.21	0.71	NM_053208
EGLN3	EGL nine homolog 3 (C. elegans)	0	0	0	0	0	0	0	0	NM_022073	0.19	0	0.4	0.12	0	0	0	0	NM_028133
EGR1	early growth response 1	0	0	0	0.42	0.21	0	0.57	0.3	NM_001964	2.43	0	0	0	0.23	0	0.67	1.56	NM_007913
EHBP1L1	EH domain binding protein 1-like 1	0.46	0	0.22	0.21	0	0	0.19	0.3	NM_001099409	0.37	0	0	0.12	0	0	0	0.14	NM_053252
EHD1	EH-domain containing 1	0.92	0.46	0	0	0.41	0.35	0	0.15	NM_006795	0	0.24	0.27	0	0.11	0	0.4	0.43	NM_010119
EHD2	EH-domain containing 2	0.46	0	0	0	0	0	0	0	NM_014601	0	0	0	0	0	0	0	0.28	NM_153068
EHD3	EH-domain containing 3	0.69	0	0	0	0	0	0	0	NM_014600	1.68	0	0	0	0.11	0.1	0.13	0.43	NM_020578
EHD4	EH-domain containing 4	0.92	0.23	0	0	0	0	0	0.6	NM_139265	0	0	0	0.12	0	0	0.54	0.14	NM_133838
EHF	ets homologous factor	0	0	0	0.21	0	0	0	0	NM_012153	0	0	0	0.12	0	0	0.27	0.71	NM_007914
EHHADH	enoyl-Coenzyme A, hydratase/3-hydroxyacyl Coenzyme A dehydrogenase	0.46	1.38	1.31	0.21	0.21	0	0	0	NM_001966	0	6.2	5.97	0.12	0	0.1	0	0	NM_023737
EHMT1	euchromatic histone-lysine N-methyltransferase 1	0	0	0	0	0	0.35	0.38	0	NM_024757	0	0	0	0.12	0	0	0	0	NM_172545
EIF1	eukaryotic translation initiation factor 1	3.44	0.69	1.75	2.52	1.45	3.29	2.66	2.11	NM_005801	9.53	1.07	0.8	1.16	0.8	0.29	1.08	2.55	NM_011508
EIF1B	eukaryotic translation initiation factor 1B	0.69	0.46	0.44	0.42	1.03	0.69	0.95	0.45	NM_005875	0	1.07	0.53	0.7	0.46	0.2	0.67	0.99	NM_026892
EIF2A	eukaryotic translation initiation factor 2A, 65kDa	0.46	0.46	0.66	0.21	0.21	0	0	0	NM_032025	0.37	0	0.13	0	0	0.1	0	0.14	NM_001005509
EIF2AK1	eukaryotic translation initiation factor 2 alpha kinase 1	0.46	0.69	0.22	0.21	0	0.52	0.19	0.15	NM_014413	0	0.24	0.27	0.81	1.14	0.69	0.4	0.28	NM_013557
EIF2AK3	eukaryotic translation initiation factor 2 alpha kinase 3	0.23	0	0	0	0	0	0	0	NM_004836	0.37	0	0.27	0.23	0.23	0.69	0.4	0.14	NM_010121
EIF2AK4	eukaryotic translation initiation factor 2 alpha kinase 4	0.23	0	0.22	0.63	0.21	0.17	0.57	0	NM_001013703	0	0	0	0	0.46	0	0	0	NM_013719
EIF2B2	eukaryotic translation initiation factor 2B, subunit 2 beta, 39kDa	0.23	0.23	0	0.42	0.41	0	0	0.3	NM_014239	0.75	0.12	0	0.12	0.11	0	0	0.14	NM_145445
EIF2B3	eukaryotic translation initiation factor 2B, subunit 3 gamma, 58kDa	0	0.23	0.22	1.05	0.21	0.17	0.38	0.15	NM_020365	0	0	0	0	0	0	0	0	NM_175135
EIF2B4	eukaryotic translation initiation factor 2B, subunit 4 delta	0	0	0	0	0	0	0.3	0.19	NM_172195	1.68	1.31	0.4	0.93	0.68	0.59	0.13	0.14	NM_010122
EIF2B5	eukaryotic translation initiation factor 2B, subunit 5 epsilon	0	0	0.22	0.21	0	0.35	0.19	0.15	NM_003907	0.56	0.24	0.27	0.81	0.68	0.39	0.67	0.28	NM_172265
EIF2C1	eukaryotic translation initiation factor 2C, 1	0	0	0	0	0	0	0.38	0	NM_012199	0	0	0	0	0	0	0	0	NM_153403
EIF3B	eukaryotic translation initiation factor 3, subunit B	0	0.23	0	0	0.62	0.35	0	0.3	NM_003751	0.19	0.6	0	0.47	0.8	0.49	0.94	0.99	NM_133916
EIF3D	eukaryotic translation initiation factor 3, subunit D	0.23	0	0.87	0.21	0.62	0.17	0.57	0.6	NM_003753	0.56	0.36	0	0.7	0.57	1.37	0.54	0.85	NM_018749
EIF3E	eukaryotic translation initiation factor 3, subunit E	0.23	0.69	0	0.21	0.41	0.69	0	0.3	NM_001568	1.12	2.27	1.33	1.74	2.05	1.18	2.42	2.84	NM_008388
EIF3EIP	eukaryotic translation initiation factor 3, subunit E interacting protein	5.97	9.19	8.09	5.05	7.43	8.13	6.65	3.47	NM_016091	1.12	0.72	0.66	0.7	2.85	2.64	2.82	1.7	NM_145139
EIF3F	eukaryotic translation initiation factor 3, subunit F	0.46	0.92	0.44	0.63	0.62	0.69	0.95	0.75	NM_003754	0	0.72	0.66	2.09	0.8	0.1	1.34	1.42	NM_025344
EIF3H	eukaryotic translation initiation factor 3, subunit H	0.23	0.23	1.09	1.05	1.24	0.17	1.33	1.51	NM_003756	0.19	0.6	1.33	1.51	0.57	0.49	1.34	1.28	NM_080635
EIF3I	eukaryotic translation initiation factor 3, subunit I	0.92	1.38	0.44	0.63	0.83	1.21	0.38	1.36	NM_003757	0.75	0.48	0.93	1.63	1.48	0.88	2.96	1.56	NM_018799
EIF3J	eukaryotic translation initiation factor 3, subunit J	0.23	0	0	0	0.21	0	0.38	0.6	NM_003758	0.75	0.12	0.27	0.35	0.34	0.1	0.4	0.57	NM_144545
EIF3K	eukaryotic translation initiation factor 3, subunit K	1.38	2.07	1.31	2.52	2.48	1.56	0.57	1.66	NM_013234	1.31	1.07	0.13	2.33	1.25	0.2	1.34	2.13	NM_028659
EIF3M	eukaryotic translation initiation factor 3, subunit M	2.52	0.46	1.53	0.21	1.65	0.35	1.14	0.45	NM_006360	1.12	0.36	0.13	0.7	1.25	0	1.21	0.99	NM_145380
EIF4A1	eukaryotic translation initiation factor 4A1	0.23	0.46	0.66	0.84	1.03	0.52	1.33	0.6	NM_001416	0.75	0.95	1.73	0.81	0.91	0.2	1.61	2.98	NM_144958
EIF4A2	eukaryotic translation initiation factor 4A, isoform 2	2.75	0.92	1.75	2.31	3.3	2.08	2.09	1.36	NM_001967	1.5	0.24	0.66	2.09	2.73	0.39	3.09	2.27	NM_013506
EIF4A3	eukaryotic translation initiation factor 4A, isoform 3	0	0	0	0	0.41	0	0.19	0.3	NM_014740	0.19	0.12	0.53	0.23	0.23	0.88	0.67	0.28	NM_138669
EIF4B	eukaryotic translation initiation factor 4B	0.69	0.23	0.44	0.21	0	0.69	0.76	0.3	NM_001417	0	0.6	1.19	0.35	0.46	0.1	0.81	0.57	NM_145625
EIF4E	eukaryotic translation initiation factor 4E	0.46	0	0	0.63	0	0.17	0.19	0.15	NM_001968	0	0	0	0	0	0	0	0	NM_007917
EIF4EBP1	eukaryotic translation initiation factor 4E binding protein 1	0.46	0.23	0	0	0.21	0.17	0.19	0.15	NM_004095	0	0.12	0	0.58	0.8	0.2	0.27	0.71	NM_007918
EIF4EBP2	eukaryotic translation initiation factor 4E binding protein 2	0.23	0.69	0.87	0	0.21	0.17	0.76	0.6	NM_004096	0	0	0.27	0.12	0	0.1	0.27	0.14	NM_010124
EIF4G3	eukaryotic translation initiation factor 4 gamma, 3	0.23	0	0	0	0	0	0	0	NM_003760	1.5	2.27	1.46	0.81	0.57	0.2	0.13	0.99	NM_172703
EIF4H	eukaryotic translation initiation factor 4H	4.13	1.38	1.09	1.26	1.24	1.38	0.38	1.66	NM_022170	1.5	1.79	0.8	0.23	0.46	0.39	0.67	0.99	NM_033561
EIF5A	eukaryotic translation initiation factor 5A	0	0.23	0.22	0.21	0.21	0.69	0.19	0.3	NM_001970	0.19	0	0	0.23	0.23	0	0	0.43	NM_181582
EIF5AL3	Eukaryotic translation initiation factor 5A-like 3	0	0	0	0	0	0	0	0	XM_926071	1.5	0.12	0.4	0.58	0.23	0.2	0.27	0	BE306222
EIF6	eukaryotic translation initiation factor 6	0.23	0	0.66	0.21	0.41	0	0.76	0.9	NM_002212	0.19	0.12	0.27	0.12	0.23	0	0.4	0.28	NM_010579
ELAC2	elaC homolog 2 (E. coli)	0.69	0.69	0.44	0.21	0.62	0	0.38	0.9	NM_018127	0.19	0	0	0	0.11	0.1	0	0	NM_023479
ELF1	E74-like factor 1	0	0	0.22	0.21	0.21	0	0.19	0.15	NM_172373	1.31	0	0	0.23	0.57	0.88	1.61	0.57	NM_007920
ELF2	E74-like factor 2	0.23	0	0.22	0	0	0	0.19	0	NM_201999	0	0	0	0.23	0	0	0	0.57	NM_023502
ELF3	E74-like factor 3 (ets domain transcription factor, epithelial-specific)	0	1.15	0.22	0.63	0.83	0.17	2.66	4.82	NM_004433	0	0	0	0.7	0.46	0.29	0.4	0.99	NM_007921
ELL2	elongation factor RNA polymerase II 2	0	0	0	0.21	0	0	0.19	0.15	NM_012081	0	0.24	0.53	0	0.34	0.1	0.27	0	NM_138953
ELMO3	engulfment and cell motility 3	0	0.69	0	0.21	0	0	0.19	0.15	NM_024712	0	0	0	0	0	0	0	0	NM_172760
ELOVL6	ELOVL family member 6, elongation of long chain fatty acids (yeast)	0	0	0	0	0	0	0	0	NM_024090	0.75	0	0	0	0.46	0.2	1.08	1.13	NM_130450
ELOVL7	ELOVL family member 7, elongation of long chain fatty acids (yeast)	0	0	0	0	0.62	0	0	0.15	NM_024930	0	0.24	0.13	0.7	0.46	0.29	1.75	0.85	NM_029001
ELP2	elongation protein 2 homolog (S. cerevisiae)	0.46	0.23	0.22	0	0	0.35	0.57	0.15	NM_018255	0.19	0	0.13	0.12	0.23	0.2	0.27	0	NM_021448
EMCN	endomucin	2.29	0	0	0	0	0	0	0	NM_016242	10.28	0.12	0	0.47	1.14	1.18	1.08	0.57	NM_016885
EMD	emerin (Emery-Dreifuss muscular dystrophy)	0.69	0.23	0.44	0.84	0.62	0.35	0.57	0.6	NM_000117	0.37	0.12	0.13	0	0.23	0	0	0.28	NM_007927
EMG1	EMG1 nucleolar protein homolog (S. cerevisiae)	0	0.46	0	0	0	0	0.38	0	NM_006331	0	0.24	0.13	0.12	0.34	0	0.13	0	NM_013536
EMID2	EMI domain containing 2	0	0	0	0	0	0	0	0	NM_133457	0	0	0	0	0	0	0.4	1.56	NM_024474
EMILIN1	elastin microfibril interfacer 1	0.92	0	0	0	0	0.35	0	0	NM_007046	0.19	0	0	0	0	0	0	0.14	NM_133918
EMILIN2	elastin microfibril interfacer 2	0	0	0	0	0	0	0	0	NM_032048	0	0	0	0	0	0	0.13	1.42	NM_145158
EML4	echinoderm microtubule associated protein like 4	0.69	0.23	0.22	0.21	0	0.35	0.19	0	NM_019063	0	0.11	0	0	0	0	0	0	NM_199466
EMP1	epithelial membrane protein 1	0	0.23	0.22	0.42	0.62	0	0	0	NM_001423	0	0.24	0	0.58	1.14	0	1.34	1.7	NM_010128
EMP3	epithelial membrane protein 3	0.46	0	0	0.21	0	0	0	0.3	NM_001425	0.19	0	0	0	0	0	0.13	0	NM_010129
EMR4	egf-like module containing, mucin-like, hormone receptor-like 4	0.23	0.23	0.87	0.84	0	0.52	0.76	1.05	NM_001080498	0	0	0	0	0	0	0	0	NM_139138
EMX2	empty spiracles homeobox 2	0	0.46	0	0.21	0	0.17	0.19	0.15	NM_004098	0	0	0	0.12	0.11	0.1	0.13	1.28	NM_010132
EMX2OS	Empty spiracles homeobox 2 opposite strand	0	0	0	0.21	0.21	0.17	0.38	0	AY117034	0	0	0	0	0	0	0	0	AY117414
ENDOD1	endonuclease domain containing 1	0.46	0	0.44	0	0.21	0.35	0	0	NM_015036	0	0	0	0	0	0	0.27	0.28	NM_028013
ENDOG	endonuclease G, nuclear gene encoding mitochondrial protein	0.23	0.46	0.87	0	0.62	0.35	0.57	0.15	NM_004435	0	0.24	0.27	0.58	0.68	0.88	0.67	0.57	NM_007931
ENG	endoglin	1.38	0	0	0	0	0.17	0	0.45	NM_000118	4.86	0.12	0	0.58	1.14	0.39	0.27	0.57	NM_007932
ENO1	enolase 1, (alpha)	0.92	10.8	3.94	9.68	8.88	11.94	13.68	20.34	NM_001428	5.23	20.88	7.44	11.4	7.06	7.44	4.7	34.46	NM_023119
ENOPH1	enolase-phosphatase 1	0.46	0	0.22	0.21	0.21	0.17	0.19	0.15	NM_021204	0.56	0	0	0	0	0	0.54	0.14	NM_026421
ENOX1	ecto-NOX disulfide-thiol exchanger 1	0	0	0	0	0.21	0	0.38	0.3	NM_017993	0.37	0	0	0	0	0	0	0	NM_172813
ENPP2	ectonucleotide pyrophosphatase/phosphodiesterase 2	0.23	2.3	0.66	0.42	0.41	0.17	0.19	0.3	AK124910	0	0.95	0.13	1.51	0.68	0.1	0	0.43	NM_015744
ENPP5	Ectonucleotide pyrophosphatase/phosphodiesterase 5	0	0	0	0	0	0	0	0	NM_021572	0	0.48	0.27	0.12	0.11	0.1	0.4	0.14	BC089320
ENTPD6	ectonucleoside triphosphate diphosphohydrolase 6 (putative function)	0	0.23	0	0	1.03	0.35	0.19	0	NM_001247	0	0	0	0	0	0	0	0	NM_172117
ENTPD8	ectonucleoside triphosphate diphosphohydrolase 8	0	0	0	0	0	0	0	0	NM_001033113	0	0.36	0	0	0	0.88	0	0	NM_028093
ENY2	enhancer of yellow 2 homolog (Drosophila)	1.38	1.84	0.87	1.05	0.62	1.04	1.14	1.05	NM_020189	0.19	0	0	0.12	0	0	0	0.14	NM_175009
EPB41L2	erythrocyte membrane protein band 4.1-like 2	0.46	0	0.22	0	0	0	0	0.15	NM_001431	0.56	0	0	0.12	0	0	0.4	0.14	AK144088
EPHB4	Eph receptor B4	0.23	0	0.22	0.21	0.21	0	0	0.15	NM_004444	0.75	0.12	0	0.12	0.23	0.1	0.27	0.57	NM_010144
EPHX1	epoxide hydrolase 1, microsomal (xenobiotic)	0.92	0.46	0.44	0.42	0	0.52	0.19	0.15	NM_000120	0	0	0	0.35	0.23	0.1	0.4	0.14	NM_010145
EPHX2	epoxide hydrolase 2, cytoplasmic	0.23	0.23	0.22	0.42	0.21	0	0.19	0	NM_001979	0	10.02	12.22	0.23	0.68	0.29	1.08	0.85	NM_007940
EPN1	epsin 1	0.92	0.92	0.66	1.26	0.62	0.52	0.57	1.21	NM_013333	0	1.07	0.4	0.23	0.57	0	0.13	0.14	NM_010147
EPN3	epsin 3	0	0	0	0.21	0	0	0.38	0.6	NM_017957	0	0	0.13	1.05	0.11	0	0.54	2.55	NM_027984
EPN3	epsin 3	0	0	0	0.21	0	0	0.38	0.6	NM_017957	0.19	0	0	0	0	0.1	0.13	0.85	NM_010148
EPS15	epidermal growth factor receptor pathway substrate 15	0.46	0.46	0	0	0.21	0.17	0	0.15	NM_001981	0	0	0.27	0	0	0	0.13	0.14	NM_007943
EPS15L1	epidermal growth factor receptor pathway substrate 15-like 1	0	0	0	0	0	0	0	0	NM_021235	1.12	0.84	0.13	0.58	1.03	0.29	0.27	0.43	NM_007944
EPS8	Epidermal growth factor receptor pathway substrate 8	0	0	0.22	0	0	0.17	0	0.15	NM_004447	0	0.12	0.13	0	0	0	0.67	0.71	CK128252
EPS8L1	EPS8-like 1	0.46	0	0	0.63	0	0	57	0.6	NM_133180	0	0	0	0	0	0.1	0.27	1.28	NM_026146
EPS8L2	EPS8-like 2	0.46	2.3	2.41	1.47	0.41	1.56	3.23	5.88	NM_022772	0	0.84	0.66	2.56	1.14	0.88	2.15	3.69	NM_133191
ERAL1	Era G-protein-like 1 (E. coli)	0	0.23	0.44	0.21	0.41	0.35	0	0	NM_005702	0	0.36	0.27	0	0.23	0.49	0.13	0.14	NM_022313
ERBB3	V-erb-b2 erythroblastic leukemia viral oncogene homolog 3 (avian)	0	0	0	0	0	0	0	0	NM_001982	0	0	0	0	0	0	0.27	0.14	BC106091
ERCC1	excision repair cross-complementing rodent repair deficiency, complementation group 1	0	0.23	0.44	0	0	0.35	0	0.3	NM_202001	0.75	0	0	0.12	0.57	0	0.13	0.43	NM_007948
ERCC3	excision repair cross-complementing rodent repair deficiency, complementation group 3 (xeroderma pigmentosum group B complementing)	0.23	0	0.22	0.21	0	0.52	0.95	0.15	NM_000122	0.19	0.24	0.27	0.12	0.34	1.27	0.67	0.28	NM_133658
ERCC5	excision repair cross-complementing rodent repair deficiency, complementation group 5 (xeroderma pigmentosum, complementation group G (Cockayne syndrome))	0.92	0.69	0.44	0.21	0.21	0.69	0	0.75	NM_000123	0	0	0	0	0.11	0.78	0.13	0	NM_011729
ERF	Ets2 repressor factor	0.92	0	0	0	0.41	0	0	0	NM_006494	0	0	0	0	0	0	0	0	NM_010155
ERH	enhancer of rudimentary homolog (Drosophila)	0.46	0	0.22	0	0.41	0.17	0.19	0.15	NM_004450	0.37	0.6	0.53	0.35	0.11	0.29	0.4	0.57	NM_007951
ERH	ERGIC and golgi 3	0.46	0	0.22	0	0.41	0.17	0.19	0.15	NM_004450	1.5	0.12	0.93	0.58	0	0.1	0.27	0.28	NM_025516
ERICH1	glutamate-rich 1	0	0	0	0	0	0	0.19	0	NM_207332	0	0	0	0	0	0.1	0.27	0	NM_001034862
ERLIN1	ER lipid raft associated 1	0.46	0	0	0	0	0	0	0	NM_006459	0	0	0.4	0	0	0.1	0	0.14	NM_145502
ERLIN2	ER lipid raft associated 2, transcript variant 1	0.23	0.46	0	0	0	0	0	0	NM_007175	0	0	0.27	0.35	0.11	0.1	0.13	0.14	NM_153592
ERMP1	endoplasmic reticulum metallopeptidase 1	0.23	0	0.44	0.21	0	0.17	0	0.3	NM_024896	0.37	0	0	0.12	0.11	0	0.4	0.14	NM_001081213
ERO1LB	ERO1-like beta (S. cerevisiae)	0	0	0	0	0	0	0	0	NM_019891	0	0	0	0	0.11	0	0.27	0.14	NM_026184
ERP27	endoplasmic reticulum protein 27 kDa	0.46	0	0.22	0	0.62	0.17	0	0.6	NM_152321	0	0	0	0	0	0	0	0	NM_026983
ERP29	endoplasmic reticulum protein 29	0	0.69	0.66	0.21	1.45	0.52	0.57	0.6	NM_006817	3.18	5.13	4.25	0.93	1.71	1.18	1.21	0.57	NM_026129
ERRFI1	ERBB receptor feedback inhibitor 1	0.23	0.23	0	0.42	1.03	0.17	0.19	0.3	NM_018948	0.19	3.34	1.46	0	0.23	0.29	0.27	0.14	NM_133753
ESAM	endothelial cell adhesion molecule	0.46	0	0	0.84	0.21	0.17	0.38	0.45	NM_138961	0.56	0	0	0.35	0.11	0	0	0	NM_027107
ESD	esterase D/formylglutathione hydrolase	0.46	0.23	0.87	0.21	0	0	0.76	0.75	NM_001984	0	0.24	0	0	0	0	0	0	NM_016903
ESPN	espin	0	0.69	0.22	0.21	0	0	0	0.15	NM_031475	0.19	1.19	0.13	0	0	0	0.13	0	NM_207689
ESRRA	estrogen-related receptor alpha	0.23	0	0.44	0.84	0.62	0.35	0.57	0.3	NM_004451	0.19	0.36	1.06	2.09	1.25	0.2	0.4	1.28	NM_007953
ESRRG	estrogen-related receptor gamma	0	0	0.22	0	0.21	0.17	0.19	0	NM_001438	0.56	0.36	0	0.12	0.46	0.2	0.4	0.14	NM_011935
ETF1	eukaryotic translation termination factor 1	0.46	0	0	0	0.21	0	0.19	0.15	NM_004730	0	0	0.4	0	0	0	0.13	0.28	NM_144866
ETFA	electron transferring flavoprotein, alpha polypeptide, nuclear gene encoding mitochondrial protein	0.46	0.69	0.66	1.05	0.41	0.52	0.38	0.15	NM_000126	0.93	2.27	4.12	3.61	4.1	0.49	2.55	1.56	NM_145615
ETFB	electron transferring flavoprotein, beta polypeptide	0.46	5.05	3.72	1.89	1.03	2.94	0.95	2.26	NM_001985	0.56	7.52	4.91	1.16	2.16	0.39	0.54	0.71	NM_026695
ETFDH	electron transferring flavoprotein, dehydrogenase	0	0.46	0	0.21	0	0.17	0	0.15	NM_004453	0	0.36	0.13	0.35	0.34	0.59	0.94	0.14	NM_025794
ETHE1	ethylmalonic encephalopathy 1	0	0.23	0.22	0	0	0	0	0.15	NM_014297	0	1.91	0.27	0.35	0.23	0.1	0	0.57	NM_023154
ETNK1	Ethanolamine kinase 1	0.23	0	0	0	0.21	0	0	0.15	NM_018638	0.19	0.12	0.4	2.09	4.22	0.69	2.42	0.99	XM_908334
ETNK2	ethanolamine kinase 2	0	0.23	0.66	0	0	0.17	0.19	0	NM_018208	0	0	0	0	0	0	0	0	NM_1765443
ETV6	ets variant gene 6 (TEL oncogene)	0	0.23	0.66	0	0.41	0	0.38	0.15	NM_001987	0	0	0	0	0	0	0	0	NM_007961
EVC	Ellis van Creveld gene homolog (human)	0	0	0	0	0	0	0	0	NM_153717	0.19	0	0.13	0.58	0.23	0.2	0.54	0	NM_021292
EVI1	Ecotropic viral integration site 1	0	0	0	0.42	0.62	0.17	0.76	0.15	BX640908	0	0	0	0	0	0	0	0	NM_007963
EVI1	Ecotropic viral integration site 1	0.23	0	0	0.21	0.41	0.35	0.76	0.15	NM_005241	0.19	0	0	0.12	1.25	0.49	0.4	0.14	BC076620
EVI5	ecotropic viral integration site 5	0	0	0	0	0	0	0	0	NM_005665	0	0.12	0	0	0	0	0.27	0.14	NM_007964
EVL	Enah/Vasp-like	0.46	0	0	0	0.41	0.35	0.19	0.15	NM_016337	0	0	0	0	0.34	0	0.13	0.99	NM_007965
EVPL	envoplakin	0	0	0	0.21	0	0	0	0	NM_001988	0	0.12	0.4	0	0.23	0	0.13	0.14	NM_025276
EWSR1	Ewing sarcoma breakpoint region 1	0.23	0.92	0.22	0.84	1.86	0.69	0.57	1.05	NM_005243	2.24	0.6	0.8	1.05	1.94	0.88	2.96	1.56	NM_007968
EXOC1	exocyst complex component 1	0.46	0	0.22	0	0.21	0	0	0.15	NM_018261	0.19	0.12	0	0.23	0.11	0	0.27	0.43	NM_027270
EXOC2	exocyst complex component 2	0	0	0.22	0	0	0	0.19	0	NM_018303	0.93	0	0.13	0.23	0.11	0	0.13	0.14	NM_025588
EXOC3	exocyst complex component 3	0.23	0.23	0	0	0.83	0.17	0.38	0.45	NM_007277	0	0	0	0	0.11	0	0	0	NM_177333
EXOC5	exocyst complex component 5	0	0	0	0	0	0	0	0	NM_006544	0	0.24	0.13	0.12	0	0.1	0.27	0	NM_207214
EXOC6	exocyst complex component 6	0	0.213	0	0	0	0	0	0	NM_019053	0	0.24	0.27	0.12	0	0	0.27	0	NM_175353
EXOC7	exocyst complex component 7	0.46	0	0.22	0	0	0.35	0.57	0.15	NM_001013839	1.12	0.12	0.13	0.12	0.68	1.37	0.81	0.43	NM_016857
EXOD1	exonuclease domain containing 1	0	0	0	0	0	0	0	0	NM_080663	0.37	0.12	0.93	0	0	0	0.13	0.14	NM_027698
EXOSC4	exosome component 4	0.92	0.23	0.44	0.42	0.41	0	0.57	0.45	NM_019037	0	0.24	0.27	0.23	0.23	0	0	0.28	NM_175399
EXOSC5	exosome component 5	0	0.23	0.22	0	0	0	0.19	0	NM_020158	1.31	0.24	0.13	0.47	0.23	0.49	0.67	0.28	NM_138586
EXOSC6	Exosome component 6	0	0.46	0	0	0	0	0.19	0	CR604283	0	0	0	0	0	0.1	0.4	0.14	NM_028274
EXT1	exostoses (multiple) 1	0.23	0.46	0.66	0.21	0.21	0.35	0.57	0	NM_000127	0.37	0.36	0.27	0.47	0.34	0.59	0.27	0.14	NM_010162
EXT2	exostoses (multiple) 2	0	0	0	0	0	0	0	0.15	NM_000401	0.93	0.6	1.59	0.47	1.37	0.1	0.4	0.71	NM_010163
EXTL3	exostoses (multiple)-like 3	0.23	0	0.22	0	0.41	0.17	0.19	0.15	NM_001440	0	0	0	0.23	0	0	0	0.14	NM_018788
F13B	coagulation factor XIII, beta subunit	0	0	0	0	0	0	0	0	NM_001994	0	2.98	0.27	0	0	0.39	0	0	NM_031164
F2RL1	coagulation factor II (thrombin) receptor-like 1	0	0	0	0.21	0.62	0.35	0.19	0.3	NM_005242	0	0	0	0.23	0	0.1	0	0.14	NM_007974
F2RL3	coagulation factor II (thrombin) receptor-like 3	0.69	0.23	0.22	0	0.41	0.17	0	0.15	NM_003950	0.37	0	0	0	0	0	0	0.14	NM_007975
FA2H	fatty acid 2-hydroxylase	0	0	0	0	0	0.17	0	0	NM_024306	0.37	0	0	0.81	0.11	0	0.27	0.14	NM_178086
FAAH	fatty acid amide hydrolase	0	0.69	0.66	0	0	0.17	0.19	0.75	NM_001441	0	0	0.13	0	0.11	0	0	0.14	NM_010173
FABP2	fatty acid binding protein 2, intestinal	0	0	0	0.42	0	0	0.38	0	NM_000134	0	0	0	0	0	0	0	0	NM_007980
FABP3	fatty acid binding protein 3, muscle and heart	0.23	0.69	0	0.42	1.03	0.52	0.38	0.15	NM_004102	0.37	0.12	0.13	2.91	5.47	16.75	0.13	0.43	NM_010174
FABP4	fatty acid binding protein 4, adipocyte	0.46	0	0	0	0	0	0	0	NM_001442	2.24	0.24	0.13	1.51	1.37	0	0.4	1.13	NM_024406
FADS1	fatty acid desaturase 1	0	0	0	0	0	0	0	0	NM_013402	0.75	0.95	0.53	0.7	0.91	1.37	1.08	0.99	NM_146094
FADS2	Fatty acid desaturase 2	0	0	0	0	0	0	0	0.15	NM_004265	0	1.43	3.45	0	0.11	0.1	0	0.28	AK143524
FADS3	fatty acid desaturase 3	0.92	0	0.87	0	0	0	0	0	NM_021727	0	0.36	1.46	0	0.23	0	0	0	NM_021890
FAF1	Fas (TNFRSF6) associated factor 1	0.69	0	0	0.42	0.21	0.52	0	0.6	NM_007051	0	0	0	0.12	0	0	0	0	NM_007983
FAH	fumarylacetoacetate hydrolase	0	0	0.23	0	0	0.21	0	0.15	NM_000137	0.56	9.9	15	0.58	0.68	0.29	0	0.28	NM_010176
FAHD1	fumarylacetoacetate hydrolase domain containing 1, transcript variant 2	0	1.15	0.44	0	0.21	0	0	0	NM_031208	0	0	0	0	0	0	0	0	NM_023480
FAHD2A	fumarylacetoacetate hydrolase domain containing 2A	0	0.46	0.22	0	0	0	0.19	0.3	NM_016044	0.75	0.48	0.27	0.58	1.14	0.2	0.4	0.14	NM_029629
FAM18B	family with sequence similarity 18, member B	1.15	0	0.87	0	0.21	0	0.19	0.15	NM_016078	0	0	0	0.23	0.11	0	0.27	0.57	NM_026210
FANCA	Fanconi anemia, complementation group A	0	0	0	0	0	0	0	0	NM_000135	0	0	0	0	0	0	0.27	0.85	NM_016925
FARP2	FERM, RhoGEF and pleckstrin domain protein 2	0.69	0.23	0	0.21	0	0.17	0	0	NM_014808	0	0.24	0.4	0	0.57	0	0.27	0.14	NM_145519
FARS2	phenylalanyl-tRNA synthetase 2, mitochondrial, nuclear gene encoding mitochondrial protein	0	0.92	0	0	0	0.17	0	0.15	NM_006567	0	0.36	0.27	0	0	0.29	0.13	0.28	NM_024274
FASTK	Fas-activated serine/threonine kinase	0	0	0	0.84	0.62	0.52	0	0.15	NM_006712	2.99	1.31	0.93	1.63	2.73	1.66	1.34	1.99	NM_023229
FASTKD1	FAST kinase domains 1	0	0	0	0	0.21	0.35	0.38	0.15	NM_024622	0	0.48	0.53	0.58	0.57	0.2	0.4	0.28	NM_177244
FASTKD3	FAST kinase domains 3	0	0.69	0	0	0	0	0	0.15	NM_024091	0	0.24	0.13	0	0.23	0	0.13	0	NM_027123
FAT	FAT tumor suppressor homolog 1 (Drosophila)	1.38	0	0.44	0	0	0.35	0.19	0.15	NM_005245	0	0	0.13	0.58	0.23	0.2	0.13	0.57	NM_001081286
FAU	Finkel-Biskis-Reilly murine sarcoma virus (FBR-MuSV) ubiquitously expressed (fox derived)	3.67	2.76	4.59	3.37	4.13	5.19	6.46	4.07	NM_001997	8.6	7.16	4.25	16.52	18.46	4.7	17.34	11.77	NM_007990
FBL	fibrillarin	0.23	0.23	0.22	0.63	0.62	0.52	0.19	0.9	NM_001436	0	0.12	0.27	0.35	0.34	0.1	0.27	0.28	NM_007991
FBP1	fructose bisphosphatase 1	0	0	0	0	0	0	0.19	0.15	NM_000507	0.37	16.82	10.22	0	0.11	0	0.4	0	NM_019395
FBRS	Fibrosin	0	0	0	0	0	0	0.38	0.3	AK096322	0	0	0	0	0	0	0	0	XM_284344
FBXL11	F-box and leucine-rich repeat protein 11	0	0	0	0	0	0.35	0.19	0.15	NM_012308	0	0.12	0	0	0.23	0.2	0.27	0	NM_001001984
FBXL14	F-box and leucine-rich repeat protein 14	0.46	0.23	0.44	0	0.41	0	0	0	CR589998	0.19	0	0.4	0.12	0.11	0	0	0	NM_133940
FBXL19	F-box and leucine-rich repeat protein 19	0	0	0	0	0.21	0	0	0	NM_001099784	0	0	0.13	0.12	0.23	0.1	0.27	0.71	NM_172748
FBXL20	F-box and leucine-rich repeat protein 20	0	0	0.44	0	0	0	0	0	NM_032875	0	0	0.4	0	0	0	0	0.14	NM_028149
FBXO2	F-box protein 2	0.46	0	0	0.84	0.62	0.35	0.76	0.6	NM_012168	0	0	0	0	0	0	0	0	NM_176848
FBXO25	F-box protein 25	0	0	0	0	0.21	0	0	0	NM_183421	0.56	0.48	0.93	0.23	0.23	0.49	0.54	0.43	NM_025785
FBXO3	F-box protein 3, transcript variant 1	0.46	0	0	0	0.41	0	0.19	0.3	NM_012175	0	0	0	0	0	0	0	0	NM_212433
FBXO33	F-box protein 33	0.46	0	0	0	0	0.17	0.38	0.3	NM_203301	0.37	0.12	0	0.81	0.11	0.1	0.4	0.71	NM_001033156
FBXO34	F-box protein 34	0	0.46	0	0	0.21	0.17	0.19	0.3	NM_017943	0	0	0	0	0	0	0	0	NM_030236
FBXO36	F-box protein 36	0	0	0	0	0	0	0.19	0	NM_174899	0	0.6	0.13	0.23	0.34	0.29	0.27	0.14	NM_025386
FBXO4	F-box protein 4	0	0	0	0	0	0	0.19	0.15	NM_012176	0	0	0.13	0.23	0.23	0	0	0.57	NM_134099
FBXO7	F-box protein 7	0.46	0.46	0.87	0	0.41	0.17	0.19	75	NM_012179	0.19	1.07	0.53	0.12	0	0	0.13	0.43	NM_153195
FBXW11	F-box and WD-40 domain protein 11	0	0	0.22	0	0.62	0	0.19	0.3	NM_033645	0	0.24	0.13	0.23	0.34	0.49	0.27	0	NM_134015
FBXW4	F-box and WD repeat domain containing 4	0.23	0.23	0.44	0.84	0.21	0.52	0.19	0.15	NM_022039	0	0	0	0.12	0	0.1	0	0	NM_013907
FBXW5	F-box and WD-40 domain protein 5	0.23	0.22	0	0.21	0.21	17	0.19	0	NM_018998	0.37	0.6	0	1.05	1.14	0.69	0.54	0.99	NM_013908
FBXW7	F-box and WD-40 domain protein 7, archipelago homolog (Drosophila)	0	0.23	0	0	0	0	0	0	NM_033632	0.75	0	0	0	0.23	0.29	0	0.28	NM_080428
FCAMR	Fc receptor, IgA, IgM, high affinity	0	0.46	0.22	0	0	0.17	0	0	NM_032029	0	0	0	0	0	0	0	0	NM_144960
FCGBP	Fc fragment of IgG binding protein	0	0	0	0.21	0.21	0.17	0	0	NM_003890	0	0	0	0	0	0	0	0.57	AK040441
FCGRT	Fc fragment of IgG, receptor, transporter, alpha	1.38	0.46	1.09	0	0.62	0.87	0.19	0.3	NM_004107	0	0	0	0	0	0	0	0	NM_010189
FCHO2	FCH domain only 2	0	0	0.44	0	0	0.35	0	0	NM_138782	0.93	0.84	0.27	1.05	2.05	0.49	2.42	1.7	NM_172591
FDFT1	farnesyl-diphosphate farnesyltransferase 1	0	0.69	0	0.42	0.83	0.52	0.38	1.05	NM_004462	0	0	0	0	0	0	0	0	NM_010191
FDPS	farnesyl diphosphate synthase (farnesyl pyrophosphate synthetase, dimethylallyltranstransferase, geranyltranstransferase)	0.69	0.23	0.87	1.47	0.83	0.52	0.76	0.45	NM_002004	0.75	0.6	0.27	0.35	0.11	0.2	0.27	1.28	NM_134469
FDPS	farnesyl diphosphate synthetase	0.69	0.23	0.87	1.47	0.83	0.52	0.76	0.45	NM_002004	0.75	0.6	0.27	0.35	0.11	0.2	0.27	1.28	NM_134469
FDX1	ferredoxin 1	0.23	0	0	0	0.21	0	0	0	NM_004109	0.93	0.48	0	0.47	0.46	0.2	0	0.57	NM_007996
FDXR	ferredoxin reductase	0	0.46	0.22	0	0	0	0	0	NM_024417	0	0	0	0	0.34	0.39	0	0	NM_007997
FEM1B	feminization 1 homolog b (C. elegans)	0	0	0	0	0	0	0	0	NM_015322	0	0	0.4	0	0	0	0	0	NM_010193
FGB	fibrinogen beta chain	0	0.92	0.87	0	0	0	0	0	NM_005141	0	0	0	0	0	0	0	0	NM_181849
FGF1	fibroblast growth factor 1	0.23	0	0	0	0	0	0	0	NM_000800	0.19	0.95	0.66	0.93	0.57	0	0	0	NM_010197
FGF18	fibroblast growth factor 18	0	0	0	0	0	0	0	0.15	NM_003862	0	0	0	0	0	0	0.27	0.57	NM_008005
FGFR1OP2	FGFR1 oncogene partner 2	0	0	0.66	0	0.41	0	0	0.15	NM_015633	1.87	0.36	0.53	0.47	1.03	0.78	1.88	0.57	NM_026218
FGFRL1	fibroblast growth factor receptor-like 1	0	0	0.22	0.21	0	0.35	0	0.15	NM_001004356	0	0	0.4	0	0	0.29	0.13	0.43	NM_054071
FHL1	four and a half LIM domains 1	2.29	0	0	0	0	0	0.38	0.3	NM_001449	0.19	0.24	0.53	0	0	0	0	0	NM_010211
FHOD3	formin homology 2 domain containing 3	0	0	0	0	0	0	0	0	NM_025135	0	0	0	1.05	0.34	0.2	0.4	0.28	NM_175276
FIBP	fibroblast growth factor (acidic) intracellular binding protein	0	0.23	0.22	0	0.21	0	0	0.15	NM_198897	0	0	0	0.23	0.34	0.1	0.27	0.28	NM_021438
FIP1L1	FIP1 like 1 (S. cerevisiae)	0	0	0	0.21	0	0	0.38	0	NM_030917	0	0	0	0	0	0	0	0	NM_024183
FKBP1A	FK506 binding protein 1A, 12kDa, transcript variant 12B	1.15	0.69	0.22	0.21	0.21	0.35	0.38	0.9	NM_000801	1.68	0.72	0.53	0.58	1.14	0.59	0.4	0.71	NM_008019
FKBP2	FK506 binding protein 2	0.23	0.46	1.09	0.63	0.41	0.35	0.57	0.45	NM_004470	1.31	0.84	0.4	1.63	1.94	0.88	1.88	1.13	NM_008020
FKBP3	FK506 binding protein 3	0.23	0	0	0	0	0.17	0	0.15	NM_002013	0.37	0.12	0.13	0.35	0.11	0.2	0.27	0.43	NM_013902
FKBP4	FK506 binding protein 4, 59kDa	0.46	0	0	0	0.21	0.52	0.57	0.45	NM_002014	2.8	1.91	1.73	1.05	2.62	2.45	2.55	1.42	NM_010219
FKBP8	FK506 binding protein 8	0	0	0.66	0.63	0.41	0.35	0.76	1.05	NM_012181	0	0	0.27	0.12	0.46	1.18	0.67	0.43	NM_010223
FKBP9	FK506 binding protein 9	2.75	0.92	0.44	1.05	1.45	0.69	0	0.15	NM_007270	0	0.6	0.8	0.35	0.34	0.1	0.54	1.42	BC043129
FKRP	fukutin related protein	0	0	0	0	0	0.17	0.19	0.15	NM_024301	0.56	0	0	0.23	0	0.2	0.67	0	NM_173430
FLII	flightless I homolog (Drosophila)	0.23	0	0.66	0.42	0.41	0.35	0.76	0.15	NM_002018	3.92	0	0.27	1.51	1.03	4.6	2.42	0.99	NM_022009
FLNA	filamin A, alpha (actin binding protein 280)	1.38	0	0	0	0.62	0	0.38	1.21	NM_001456	3.92	0	0	0.12	0.46	0.59	0.81	0.14	NM_010227
FLNB	filamin B, beta (actin binding protein 278)	0.23	0	0.22	0.21	0	0.35	0.57	0.15	NM_001457	0.19	0	0.13	0.12	0.23	0.59	0.94	0.43	NM_134080
FLNC	filamin C, gamma (actin binding protein 280)	0.46	0	0	0	0	0	0	0	NM_001458	0	0	0	0	0	0	0	0	NM_001081185
FLOT1	flotillin 1	1.15	0.69	0.66	0.84	0.41	1.04	0.76	2.71	NM_005803	0	0	0.13	0.47	0.46	2.25	1.34	1.13	NM_008027
FLOT2	flotillin 2	0.69	0.23	1.31	0.21	0.41	0.87	0.95	0.15	NM_004475	0	0	0	0	0	0	0	0	NM_008028
FLYWCH1	FLYWCH-type zinc finger 1	0	0	0	0	0	0	0	0	NM_032296	0	0	0	0	0.11	0.2	0.27	0.14	AK034869
FMN2	formin 2	1.38	0	0	0	0	0	0	0	NM_020066	0	0	0	0	0	0	0	0	NM_019445
FMO1	flavin containing monooxygenase 1	0	1.15	1.75	0	0	0	0	0	NM_002021	0.37	3.82	1.33	0	0.11	0	0.13	0	NM_010231
FMO2	flavin containing monooxygenase 2	0	0	0	0	0	0	0	0	NM_001460	0.93	0.36	0.27	0.23	0.23	0	0.13	0.28	NM_018881
FMR1	fragile X mental retardation 1	0.23	0.23	0.44	0	0	0.17	0	0.15	NM_002024	0.37	0	0	0	0	0	0.13	0	NM_008031
FNBP1L	formin binding protein 1-like	0.69	0	0	0.42	0.21	0.17	0.38	0.15	NM_001024948	0	0	0	0.35	0.46	0.2	0.4	0.43	NM_153118
FNDC3B	fibronectin type III domain containing 3B	0.69	0	0.22	0	0	0.17	0.57	0	NM_022763	0.19	0	0	0	0.13	0	0.13	0	NM_173182
FNTA	farnesyltransferase, CAAX box, alpha	0	0	0	0	0.21	0.35	0.19	0.32	NM_002027	1.5	1.79	0.93	0.93	0.91	0.59	1.48	1.56	NM_008033
FOLR1	folate receptor 1 (adult)	0	0.46	0	0.63	1.24	0.17	1.33	1.36	NM_016725	0	8.59	6.77	0.12	0	0.59	0.27	0.99	NM_008034
FOS	v-fos FBJ murine osteosarcoma viral oncogene homolog	10.1	1.61	4.15	7.36	2.27	3.63	15.96	12.05	NM_005252	2.99	0	0	4.3	1.82	1.18	2.15	9.22	NM_010234
FOSB	FBJ osteosarcoma oncogene B	0.23	0	0	1.26	0.62	0.35	0.19	1.21	NM_006732	2.62	0	0	0.35	0.11	0.1	0.81	0.85	NM_008036
FOSL2	fos-like antigen 2	0	0	0	0	0	0	0.19	0.3	NM_005253	0.37	0	0	0	0	0	0.4	0	NM_008037
FOXC1	forkhead box C1	4.59	0	0.44	0.42	0.21	0.17	0	0	NM_001453	0	0	0.13	0.12	0	0	0	0	NM_008592
FOXI1	forkhead box I1	0	0	0	0	0	0.17	0.38	0.15	NM_012188	0.37	0	0	0	0	0.1	3.09	4.4	NM_023907
FOXN2	forkhead box N2	0.23	0	0	0	0	0	0	0.15	NM_002158	4.86	1.55	1.33	3.37	2.96	1.66	2.02	4.25	NM_180974
FOXO4	forkhead box O4	0.46	0	0.22	0.21	0.41	0	0	0	NM_005938	0	0	0	0	0	0	0	0.14	NM_018789
FOXP1	Forkhead box P1	0	0	0	0	0	0	0	0	NM_032682	0	0	0	0	0.11	0	0.27	0.43	AK033622
FOXQ1	forkhead box Q1	0	0	0	0	0.41	0	0	0.3	NM_033260	0	0	0	0.12	0.91	0.1	0.67	0.14	NM_008239
FOXRED1	FAD-dependent oxidoreductase domain containing 1	0	0.23	0	0.21	0	0.17	0	0.15	NM_017547	0	0	0	0.12	0.23	0	0.27	0	NM_172291
FOXRED2	FAD-dependent oxidoreductase domain containing 2	0.92	0.46	0.44	0	1.24	0.69	0.57	0.6	NM_024955	0	0	0	0	0	0.2	0	0	NM_001017983
FPGS	folylpolyglutamyl synthetase	0	0	0.44	0	0.21	0.69	0	0.6	NM_004957	0.93	0.24	0.53	0	0.23	0.69	0.13	0.57	NM_010236
FRAG1	FGF receptor activating protein 1	0.23	0	0.22	0	0	0	0	0.15	NM_014489	0	0	0.4	0.12	0.11	0.49	0	0	AK159933
FRAP1	FK506 binding protein 12-rapamycin associated protein 1	0	0	0.22	0	0.21	0.17	0	0	NM_004958	0.19	1.19	2.12	0.12	0.11	0.29	0.54	0.14	NM_020009
FRAS1	Fraser syndrome 1	0	0.23	0.22	0.42	0.62	0.69	0.19	0	NM_025074	0	0.12	0.13	0	0.11	0.1	0.27	0.43	NM_175473
FREM1	FRAS1 related extracellular matrix 1	0.92	0	0	0	0	0.17	0	0.15	BX648240	0	0	0	0	0	0	0	0	NM_177863
FRG1	FSHD region gene 1	0.46	0.69	0	0.21	0.21	0.17	0.57	0.3	NM_004477	0	0	0.27	0.12	0.11	0	0	0	NM_013522
FRMD3	FERM domain containing 3	0.69	0	0.22	0	0	0	0	0	BX647549	0	0	0	0	0	0	0	0	NM_172869
FRMD4A	FERM domain containing 4A	0.23	0	0	0.63	0.21	0.35	0	0.15	NM_018027	0	0	0	0	0	0	0	0	NM_172475
FRRS1	ferric-chelate reductase 1	0	0	0	0	0	0	0	0	NM_001013660	0	1.43	0.53	0.35	0	0	0.13	0	NM_009146
FSCN1	fascin homolog 1, actin-bundling protein (Strongylocentrotus purpuratus)	0.46	0	0	0	0	0	0	0	NM_003088	0.56	0	0	0	0	0	0	0	NM_007984
FSTL1	follistatin-like 1	0.69	0	0	0	0	0	0.19	0	NM_007085	0.37	0.12	0	0.58	0.23	0	1.34	0.71	NM_008047
FSTL1	Follistatin-like 1	0.69	0	0	0	0	0	0.19	0	NM_007805	0.56	0	0	0	0.23	0.1	0.67	0	BF180974
FSTL3	follistatin-like 3 (secreted glycoprotein)	0.46	0	0	0.21	0.21	0	0.19	0	NM_005860	0	0	0	0	0	0	0	0	NM_031380
FTCD	formiminotransferase cyclodeaminase	0	4.37	1.53	0	0	0	0.19	0	NM_206965	0	1.19	0.4	0	0	0	0	0	NM_080845
FTH1	ferritin, heavy polypeptide 1	5.28	8.04	15.74	8.2	12.59	6.4	6.08	8.29	NM_002032	11.96	40.8	32.8	18.14	15.72	8.42	7.39	9.07	NM_010239
FTL	ferritin, light polypeptide	8.03	70.54	72.16	5.89	10.53	13.84	4.56	9.34	NM_000146	10.28	29.59	13.68	11.63	9.46	5.39	8.33	20.42	NM_010240
FTSJ3	FtsJ homolog 3 (E. coli)	0.23	0.23	0	0	0	0	0.38	0	NM_017647	1.31	0	0	0	0.34	0.29	0.4	0.14	NM_025310
FUCA1	fucosidase, alpha-L- 1, tissue	2.07	1.38	0.66	0.42	0.41	1.04	1.14	1.51	NM_000147	0	0	0	0	0	0	0	0.14	NM_024243
FUCA2	fucosidase, alpha-L- 2, plasma	0.92	0.23	0.44	0	0	0	0.19	0.3	NM_032020	0	0.12	0.13	0	0	0	0	0	NM_025799
FUK	fucokinase	0	0	0	0	0	0.17	0.38	0	NM_145059	0	0	0.13	0.23	0	0	0.13	0.14	NM_181666
FUNDC2	FUN14 domain containing 2	0.46	0.23	0	0.63	0.21	0.17	0.95	0.15	AK091092	0	0	0	0	0	0	0	0	NM_026126
FUS	fusion, derived from t(12;16) malignant liposarcoma (human)	2.98	0	0.44	1.05	1.24	2.08	2.28	1.66	AB208902	0.56	0.6	0.13	1.74	1.94	1.66	3.9	0.99	NM_139149
FUSIP1	FUS interacting protein (serine-arginine rich) 1, transcript variant 2.	0.69	0	0.22	0	0	0.17	0	0.15	NM_006625	0.56	0.12	0	0.58	0.68	0.59	0.81	0.14	NM_001080387
FUT8	fucosyltransferase 8	0	0	0	0	0.21	0	0	0	NM_178155	0.19	0.12	0.53	0	0	0.29	0.13	0	NM_016893
FVT1	Follicular lymphoma variant translocation 1	0.23	0	0	0	0	0	0	0	NM_002035	0	0.36	0.53	0	0.11	0.1	0	0	BQ033284
FXYD2	FXYD domain containing ion transport regulator 2	0.23	0	0.22	0.63	1.03	1.04	0	0	BX641053	3.92	51.77	30.01	59.78	28.14	18.02	1.75	2.69	NM_007503
FXYD4	FXYD domain containing ion transport regulator 4	0	0.46	5.47	0.21	0	0.87	38.95	70.81	NM_173160	0	0	0	0	0	0	0.13	0.85	AK054004
FXYD6	FXYD domain containing ion transport regulator 6	0.69	0	0	0	0	0	0	0.3	NM_022003	0	0	0	0	0	0.1	0	0.14	NM_022004
FYCO1	FYVE and coiled-coil domain containing 1	0	0	0	0	0	0	0	0	NM_024513	0	0.24	0	0.12	0.23	0.1	0.27	0	NM_148925
FYN	Fyn proto-oncogene	0.69	0	0.22	0	0	0	0.19	0	NM_002037	0.19	0	0	0.12	0	0	0.27	0	AK156584
FZD1	frizzled homolog 1 (Drosophila)	0	0	0	0	0	0.21	0	0	NM_003505	0.37	0.95	0.8	0	0	0	0.4	0.71	NM_021457
FZD2	frizzled homolog 2 (Drosophila)	0.46	0	0	0	0	0	0	0	NM_001466	0	0	0	0	0.11	0	0	0	NM_020510
FZD4	frizzled homolog 4 (Drosophila)	0	0	0.22	0	0	0.17	0.38	0	NM_012193	0	0	0	0	0	0	0	0	NM_008055
FZR1	fizzy/cell division cycle 20 related 1 (Drosophila)	0	0	0	0	0	0	0	0	NM_01263	0	0	0	0.12	0	0	0.27	0	NM_019757
G0S2	G0/G1switch 2	0.92	0.46	0.22	0.84	1.24	0.17	0	0.15	NM_015714	0	1.07	0.13	0	0.11	0	0	0	NM_008059
G3BP1	Ras-GTPase-activating protein SH3-domain binding protein 1	0.23	0	0.22	0.21	0.21	0	0	0	NM_005754	0	0.12	0	0	0.34	0	0.67	0.28	NM_013716
G6PC3	glucose 6 phosphatase, catalytic, 3	0	0.46	0.44	0.21	0.21	0.35	0.57	0.15	NM_138387	0	0.24	0.13	0	0.23	0.1	0	0.28	NM_175935
GAA	glucosidase, alpha, acid	0.23	0.69	0.87	0.63	0	0.69	0.57	0.75	NM_000152	0	0.48	0.13	0.23	0.11	0.1	0.54	0.71	NM_008064
GAB1	growth factor receptor bound protein 2-associated protein 1	0	0	0.22	0	0	0	0	0.15	NM_207123	2.43	0.48	0.27	0.47	0.68	0.1	0.4	0.85	NM_021356
GABARAP	GABA(A) receptor-associated protein	1.38	1.38	1.09	3.37	2.06	1.73	2.47	1.96	NM_007278	1.31	4.29	2.12	1.86	1.25	0.69	1.61	1.99	NM_019749
GABARAPL1	gamma-aminobutyric acid (GABA(A)) receptor-associated protein-like 1 (Gabarapl1).	0	0.23	0.44	0.84	0.41	0.35	0.95	0	NM_031412	2.06	1.55	2.26	5.23	5.47	6.95	3.09	4.4	NM_020590
GABARAPL2	gamma-aminobutyric acid (GABA-A) receptor-associated protein-like 2	1.38	0.23	0	0	1.24	1.38	0.57	0.45	NM_007285	0	0.12	0.27	1.51	0.8	0.98	0.94	0.85	NM_026693
GADD45A	growth arrest and DNA-damage-inducible, alpha	0.69	1.15	2.19	1.05	1.03	0.69	1.14	0.9	NM_001924	1.5	0.48	0.27	0.58	0.11	0.39	0.4	1.13	NM_007836
GADD45B	growth arrest and DNA-damage-inducible, beta	1.15	0.46	0.22	1.68	0.41	1.21	3.42	4.97	NM_015675	0	0	0	0.12	0.23	0.69	0.27	0.57	NM_008655
GADD45G	growth arrest and DNA-damage-inducible 45 gamma	0.23	0.22	0.22	0	0	0.35	0.19	0.15	NM_006705	1.5	0.24	0.13	2.91	2.96	0.78	0.67	0.85	NM_011817
GAK	cyclin G associated kinase	0	0	0	0.22	0.21	0	0	0.15	NM_005255	0	1.07	0.8	0.93	0.91	0.39	1.08	0.28	NM_153569
GAL3ST1	galactose-3-O-sulfotransferase 1	0	0.46	0.22	0	0	0	0	0.15	NM_004861	0	0.12	0	1.98	0.57	0.29	0.13	0.57	NM_016922
GAL3ST3	galactose-3-O-sulfotransferase 3	0	1.61	1.31	0	0	0.17	0	0.3	NM_033036	0	0	0	0	0	0	0	0	NM_001024717
GALC	galactosylceramidase, transcript variant 1	0.46	0	0	0.21	0	0	0	0.15	NM_000153	0	0.6	0.4	0.23	0.11	0	0.13	0.14	NM_008079
GALNS	galactosamine (N-acetyl)-6-sulfate sulfatase	0	0.23	0	0	0	0	0.19	0.3	NM_000512	1.12	1.67	4.38	0	0.11	0.69	0.54	0.14	NM_016722
GALNT1	UDP-N-acetyl-alpha-D-galactosamine:polypeptide N-acetylgalactosaminyltransferase 1	0	0	0.22	0.21	0.21	0.17	0	0.15	NM_020474	0	1.43	1.46	0.47	0.68	0.49	0.27	0.43	AK083391
GALNT11	UDP-N-acetyl-alpha-D-galactosamine:polypeptide N-acetylgalactosaminyltransferase 11	0.92	0.69	3.5	0.42	0.41	0	0.19	0.6	NM_022087	0	1.55	1.33	0	0	0	0	0	BC021504
GALNT14	UDP-N-acetyl-alpha-D-galactosamine:polypeptide N-acetylgalactosaminyltransferase 14 (GalNAc-T14)	0	0.46	0	0	0.21	0	0	0.15	NM_024572	0	0	0	0	0	0	0	0	NM_027864
GALNT2	UDP-N-acetyl-alpha-D-galactosamine:polypeptide N-acetylgalactosaminyltransferase 2	0	0	0	0	0.21	0	0	0	NM_004481	0.19	0.12	0.27	0.12	0.11	0.49	1.21	0	NM_139272
GALNT3	UDP-N-acetyl-alpha-D-galactosamine:polypeptide N-acetylgalactosaminyltransferase 3	0	0	0	0.21	0	0	0	0.15	NM_004482	0	0	0	0	0	0	0.54	0	AK019995
GALNT7	UDP-N-acetyl-alpha-D-galactosamine:polypeptide N-acetylgalactosaminyltransferase 7 (GalNAc-T7)	0.69	0	0	0.21	0.21	0	0.38	0.3	NM_017423	0	0	0	0	0	0	0	0	NM_144731
GALNTL4	UDP-N-acetyl-alpha-D-galactosamine:polypeptide N-acetylgalactosaminyltransferase-like 4	0	0	0	0.42	0.62	0	0.38	0.3	NM_198516	0.19	0.12	0	0.58	0.46	3.23	0.27	0.14	NM_173739
GALT	galactose-1-phosphate uridylyltransferase	0	0.23	0.44	0	0	0.52	0.57	0.15	NM_000155	0	0	0	0	0	0	0	0	NM_016658
GAMT	guanidinoacetate N-methyltransferase, transcript variant 1	0	0.46	0.66	0.21	0	0.35	0.57	0.45	NM_000156	0	0.12	0.13	0	0	0	0	0	NM_010255
GAPDH	glyceraldehyde-3-phosphate dehydrogenase	2.07	3.45	5.69	2.95	2.27	4.33	3.42	7.99	NM_002046	5.98	18.49	11.68	15.47	11.85	8.81	19.22	13.9	NM_008084
GART	phosphoribosylglycinamide formyltransferase, phosphoribosylglycinamide synthetase, phosphoribosylaminoimidazole synthetase, transcript variant 2	0.23	0.46	0	0.42	0	0	0	0	NM_175085	0.56	0.12	0.27	0	0.68	0.39	0.67	0.14	NM_010256
GART	phosphoribosylglycinamide formyltransferase, phosphoribosylglycinamide synthetase, phosphoribosylaminoimidazole synthetase, transcript variant 1	0.46	0	0.22	0	0	0	0	0.15	NM_000819	0.56	0.12	0.27	0	0.68	0.39	0.67	0.14	NM_010256
GAS1	growth arrest-specific 1	0.69	0	0	0.21	0	0	0	0	NM_002048	0	0	0	0.12	0.11	0	0	0	NM_008086
GAS6	growth arrest specific 6	0.69	0.23	0.87	0.42	1.24	0.52	0	0.6	NM_000820	0	0.84	0.13	1.4	1.37	1.66	0.81	0.14	NM_019521
GATA2	GATA binding protein 2	0	0	0.22	0	0	0	0.19	0.15	NM_032638	1.68	0	0	0	0	0	1.34	0.85	NM_008090
GATA3	GATA binding protein 3	0.23	0	0	0	0	0.17	0	0.75	NM_001002295	0	0	0	0	0	0	0.27	0.14	NM_008091
GATA5	GATA binding protein 5	0.46	0	0	0	0.21	0	0	0	NM_080473	0	0	0	0	0	0	0	0	NM_008093
GATM	glycine amidinotransferase (L-arginine:glycine amidinotransferase)	0	5.74	9.4	1.05	0.21	1.73	0.19	0.15	NM_001482	0.75	3.22	0.66	0	0	0	0	0	NM_025961
GATS	opposite strand transcription unit to Stag3	0	0	0	0	0	0	0	0	NM_178831	0	1.55	0.4	0.12	0.34	0.49	0.54	0	NM_030719
GBA2	glucosidase beta 2	0	0	0.22	0	0	0	0.19	0	NM_020944	0.56	0.12	0.13	0.12	0	0	0.27	0.28	NM_172692
GBAS	glioblastoma amplified sequence	0.46	0.23	0.44	0.63	0.41	1.38	1.33	0.75	NM_001483	1.12	0	0.27	0.7	0.34	0.78	0.54	0.71	NM_008095
GBF1	golgi-specific brefeldin A-resistance factor 1	0	0	0.22	0.21	0	0	0	0	NM_004193	0.93	0.12	0.27	0.35	0.34	0.1	0.13	0.28	NM_178930
GBL	G protein beta subunit-like	0	0	0.22	21	0	0.35	0	0	NM_022372	0.19	0.12	0	0.23	0.34	0.1	0.27	0.28	NM_019988
GCC1	golgi coiled coil 1	0	0	0	0.21	0	0	0.19	0.15	NM_024523	0	0.12	0	0	0.11	0.1	0.27	0	NM_028900
GCDH	glutaryl-Coenzyme A dehydrogenase, nuclear gene encoding mitochondrial protein	0.23	0.46	0.22	0	0	0.17	0.38	0	NM_000159	0	0.6	0.53	0.12	0.34	0.1	0	0	NM_080097
GCGR	glucagon receptor	0	0.23	0	0.84	1.03	0.35	0.19	0	NM_000160	0.19	0	0	0.47	2.05	0.49	0.27	0.28	NM_008101
GCHFR	GTP cyclohydrolase I feedback regulator	0	0.92	0.66	0	0	0	0	0.15	NM_005258	0.19	1.31	0.93	0	0	0	0	0.14	NM_177157
GCLC	glutamate-cysteine ligase, catalytic subunit	0	0.23	0.66	0	0	0	0	0.3	NM_001498	0.75	0	0	0	0	0.1	0	0	NM_010295
GCN1L1	GCN1 general control of amino-acid synthesis 1-like 1 (yeast)	0	0.23	0	0	0.21	0	0	0	NM_006836	0	0.12	0	0.35	0.68	0.49	1.08	0.57	NM_172719
GCN5L2	GCN5 general control of amino-acid synthesis 5-like 2 (yeast)	0.46	0.23	0.22	0.21	0.21	0.17	0.19	0.3	NM_021078	0	0	0	0	0	0	0	0	NM_020004
GCNT1	glucosaminyl (N-acetyl) transferase 1, core 2	0	0	0	0	0	0	0	0	NM_001097634	0	1.43	1.59	0	0.11	0	0.4	0	NM_173442
GCS1	glucosidase 1	0	0	0	0	0.21	0	0	0	NM_006302	0.19	0.12	0.53	0.23	0.11	0	0.27	0	NM_020619
GCSH	glycine cleavage system protein H (aminomethyl carrier)	0.46	0.69	0.87	0	0.21	0.69	0.19	0.6	NM_004483	0.19	0.6	0.53	0.47	0.68	0.29	1.61	0.43	NM_026572
GDA	guanine deaminase	0	2.07	0	0	0	0	0.19	0	NM_004293	0	0	0	0	0	0	0	0	NM_010266
GDF15	growth differentiation factor 15	0.23	0.69	1.97	1.68	3.3	1.56	17.1	18.53	NM_004864	0	0.12	0.13	0.35	0.34	0.59	5.24	4.82	NM_011819
GDF5	growth differentiation factor 5	0.69	0	0	0.21	1.03	0.17	0.57	0.15	NM_000557	0	0	0	0	0	0	0	0	NM_008109
GDF7	growth differentiation factor 7	0	0.23	0.66	0	0	0	0	0.75	NM_182828	0	0	0	0	0	0	0	0	NM_013527
GDI1	guanosine diphosphate (GDP) dissociation inhibitor 1	0.23	0.23	0.44	0.42	0.21	0	0	0.15	NM_001493	1.5	0.48	0.53	2.44	2.96	1.96	4.97	2.69	NM_010273
GDI2	GDP dissociation inhibitor 2	0.23	0.69	0.66	0.42	0.21	0.17	0	0.45	NM_001494	0.56	0	0	0	0	0	0.27	0	NM_177367
GEMIN7	gem (nuclear organelle) associated protein 7	0	0	0	0	0	0	0	0	NM_024707	0	0	0.53	0	0	0	0	0.14	NM_027189
GFM2	G elongation factor, mitochondrial 2	0	0	0.22	0.21	0.41	0.17	0	0.15	NM_032380	0	0.36	0.66	0	0.11	0	0	0.14	NM_177266
GFRA4	Glial cell line derived neurotrophic factor family receptor alpha 4	0	0	0	0	0	0	0	0	NM_022139	0	0	0	0	0	0	0.13	1.13	AB041809
GGA1	golgi associated, gamma adaptin ear containing, ARF binding protein 1	0.23	0	0	0.21	0	0	0	0	NM_013365	0	0.24	0.4	1.28	0.57	0.39	1.08	1.42	NM_145929
GGA3	golgi associated, gamma adaptin ear containing, ARF binding protein 3	0	0.23	0.44	0	0	0.17	0.19	0.3	NM_138619	0	0.12	0.13	0.23	0	0	0.13	0.14	NM_173048
GGH	gamma-glutamyl hydrolase (conjugase, folylpolygammaglutamyl hydrolase)	0.23	0	1.09	0	0	0	0.38	0	NM_003878	0	0	0	0.12	0	0.1	0	0	NM_010281
GGT6	gamma-glutamyltransferase 6 homolog (rat)	0	1.84	0.22	0.84	1.24	0.52	0	1.81	NM_153338	0	0.24	0	0	0	0.1	0	0	NM_027819
GHITM	growth hormone inducible transmembrane protein	0.69	0.92	1.09	0.42	0	1.21	0.57	1.21	NM_014394	2.62	10.02	8.5	8.03	14.59	12.63	11.02	5.53	NM_078478
GHR	growth hormone receptor, transcript variant 1	0	0.23	0	0	0	0	0	0.15	NM_000163	0	0	0.66	0.12	0	0.1	0	0	NM_010284
GIPC1	GIPC PDZ domain containing family, member 1	0.23	0.23	0.22	0	0.21	0.52	0.95	0.15	NM_005716	0.56	0.36	0.27	0.58	1.03	0.29	2.15	1.56	NM_018771
GIPC2	GIPC PDZ domain containing family, member 2	0	0	0	0	0	0	0.19	0	NM_017655	0	0.6	0.13	0	0.23	0.2	0.4	0.85	NM_016867
GJA1	gap junction protein, alpha 1, 43kDa	1.61	0	0.22	0	0	0.17	0	0.45	NM_000165	0	0	0	0	0	0	0	0	NM_010288
GJA4	gap junction protein, alpha 4, 37kDa	1.15	1.15	0.66	0.42	0.41	0.87	0	0.6	NM_002060	0	0.12	0	0	0	0	0	0.14	NM_008120
GJB2	gap junction membrane channel protein beta 2	0.23	0	0	0	0	0	0	0	NM_004004	0	0.12	0.27	0	0	0	0.27	0	NM_008125
GKAP1	G kinase anchoring protein 1	0	0.23	0	0.21	0	0	0	0	NM_025211	0	1.43	1.33	0.35	0.46	0.1	0.94	0.57	NM_019832
GLB1	galactosidase, beta 1	0.46	0.46	0	0.21	0.62	1.21	0.19	0.45	NM_000404	0	1.31	1.59	0	0.8	0.98	0.27	0.14	NM_009752
GLB1L	Galactosidase, beta 1-like	0.23	0	0.23	0	0	0	0	0	NM_024506	0	0.24	0.4	0.12	0.11	0.1	0.13	0	AK029925
GLG1	golgi apparatus protein 1	0.23	1.15	0.87	0.42	0	0.17	0.19	0	NM_012201	0.19	0.36	0.4	0.58	0.11	0	0.94	0.28	NM_009149
GLG1	Golgi apparatus protein 1	0.23	1.15	0.87	0.42	0	0.17	0.19	0	NM_012201	0.19	0	0.13	1.16	0.46	0.98	0.94	0.71	AK088720
GLIS2	GLIS family zinc finger 2	0	0	0	0	0.21	0	0	0.15	NM_032575	0	0	0	1.63	1.6	0	1.08	0.99	NM_031184
GLMN	glomulin, FKBP associated protein	0	0	0	0	0	0	0	0	NM_053274	0	0	0	0	0	0.1	0.27	0	NM_133248
GLO1	glyoxalase 1	0	0	0	0	0	0	0	0	NM_006708	0.56	1.19	0.8	0.35	0.68	0.49	0.27	0.43	NM_025374
GLOD4	glyoxalase domain containing 4	0.46	0.46	0.22	0.42	0	0.35	0	0.45	NM_016080	0	0.12	0	0	0.11	0.1	0.27	0	NM_026029
GLOD5	glyoxalase domain containing 5	0	0	0	0	0	0	0	0	NM_001080489	0	0.24	0.27	0.12	0.57	0.2	0.54	0.14	NM_027227
GLRX	glutaredoxin	0.46	1.38	2.41	0.84	1.65	1.04	0.19	1.21	NM_002064	0	1.55	0	0.47	0.34	1.37	0.81	0.28	NM_053108
GLRX5	glutaredoxin 5 homolog (S. cerevisiae)	0.46	0.92	0.66	0.84	2.27	0.35	0.38	0.3	NM_016417	0.19	1.31	0.53	1.4	1.14	0.39	0.81	0.43	NM_028419
GLS	glutaminase	0.46	1.38	1.09	0.21	0.21	0.52	0.38	0.75	NM_014905	0	0	0	0	0	0	0	0	NM_001081081
GLT8D3	glycosyltransferase 8 domain containing 3	0	0	0	0.21	0	0.17	0	0	NM_173601	0.19	0	0	0	0.11	0.59	0.54	0.14	NM_001033275
GLTSCR2	glioma tumor suppressor candidate region gene 2	2.07	1.84	1.31	1.26	1.03	2.08	1.71	1.21	NM_015710	0	0	0	0	0	0	0	0	NM_133831
GLUD1	glutamate dehydrogenase 1	0.46	0	0.22	1.05	0.41	0.69	0.19	0.15	NM_005271	1.12	3.94	0.8	1.16	1.03	0.29	0.81	1.7	NM_008133
GLUL	glutamate-ammonia ligase (glutamine synthetase)	0.92	0	0.87	0.21	0.83	0.35	0.57	1.66	BC051726	1.12	1.55	1.99	0	0	0.1	0.4	0.43	NM_008131
GLYAT	glycine-N-acyltransferase	0	0.46	0.22	0	0	0	0	0	NM_201648	0	2.15	0.66	0	0	0	0	0	NM_145935
GM2A	GM2 ganglioside activator protein	0.46	0.23	0	0	0	0	0	0	NM_000405	0.19	1.55	1.06	0	0	0.29	0.4	0.14	NM_010299
GMCL1	germ cell-less homolog 1 (Drosophila)	0	0	0	0	0	0	0	0	NM_178439	0.75	0.95	0.4	0.93	1.03	0.2	0.94	1.56	NM_011818
GMFG	glia maturation factor, gamma	0.46	0	0	0	0	0	0	0	NM_004877	0	0	0	0	0.11	0	0	0	NM_022024
GMNN	geminin, DNA replication inhibitor	0	0	0	0	0	0	0.38	0.15	NM_015895	0	0	0	0	0	0	0	0.14	NM_020567
GMPR2	guanosine monophosphate reductase 2	0.23	0	0.22	0.63	0.21	0.17	0.19	0.3	NM_016576	0	0.12	0.27	0.12	0.34	0.29	0.67	0.71	NM_177992
GMPS	guanine monphosphate synthetase	0.23	0.23	0	0	0	0	0.38	0.15	NM_003875	0	0	0	0	0	0	0	0	NM_001033300
GNA11	guanine nucleotide binding protein (G protein), alpha 11 (Gq class)	0.46	0	0	0	0.41	0	0.19	0	NM_002067	0.19	0.48	0.13	0.12	0.11	0	0.13	0.28	NM_010305
GNAI2	guanine nucleotide binding protein (G protein), alpha inhibiting activity polypeptide 2	0.23	0.69	0	0	0	0	0.19	0.45	NM_002070	0	0.12	0.13	0.12	0.34	0	0.13	0.28	AK159222
GNAQ	guanine nucleotide binding protein, alpha q polypeptide	0.23	0	0	0	0.21	0	0	0	NM_002072	0	0.12	0.13	0.23	0.11	0	0.13	0.28	NM_008139
GNB1	guanine nucleotide binding protein, beta 1	2.98	0.69	0.87	1.05	0.83	1.56	1.52	1.21	NM_002074	0.93	0	0	0.35	0.57	0.39	1.88	0.71	NM_008142
GNB2	guanine nucleotide binding protein (G protein), beta polypeptide 2	0.46	0.23	0.22	0.42	0.62	0.87	0.57	0.75	NM_005273	4.67	0.95	0.4	3.49	3.08	1.27	4.84	7.94	NM_010312
GNB2L1	guanine nucleotide binding protein (G protein), beta polypeptide 2 like 1	1.84	2.53	3.5	1.26	2.06	3.11	3.42	2.56	NM_006098	0.56	3.82	1.06	1.16	1.03	0.29	1.21	1.13	NM_008143
GNE	glucosamine	0.23	0	0.22	0	0	0	0.19	0	NM_005476	0.56	0.12	0	0.12	0.34	0.1	0.4	0.14	NM_015828
GNG11	guanine nucleotide binding protein (G protein), gamma 11	1.38	0	0.44	0.21	0	0	0.76	1.21	NM_004126	0.75	0	0	0	0	0.1	0	0	NM_025331
GNG12	guanine nucleotide binding protein (G protein), gamma 12	0.46	0	0.44	0.42	0	0.35	0.19	0.3	NM_018841	0.56	0.48	0.4	0.47	0.57	0.29	1.48	2.27	NM_025278
GNG2	guanine nucleotide binding protein (G protein), gamma 2	0.46	0	0	0	0.21	0	0	0	NM_053064	0	0	0	0	0	0	0	0	NM_010315
GNL3	guanine nucleotide binding protein-like 3 (nucleolar), transcript variant 1.	0	0	0	0.21	0	0	0	0	NM_014366	0.19	0	0.4	0	0.11	0	0.13	0	NM_153547
GNPAT	glyceronephosphate O-acyltransferase	0.69	0	0	0.42	0.41	0.17	0.57	0.45	NM_014236	0	0.12	0	0.23	0.46	0	0.4	0.14	NM_010322
GNPDA1	glucosamine-6-phosphate deaminase 1	0.23	1.38	0.22	0	0.41	0.17	0.38	0.3	NM_005471	0	1.79	1.19	0.35	0.23	0.1	0.27	0.43	NM_011937
GNPTAB	N-acetylglucosamine-1-phosphate transferase, alpha and beta subunits	0	0	0	0	0	0.17	0	0.15	NM_024312	0	0	0.13	0.12	0.23	0	0.27	0	NM_001004164
GNPTG	N-acetylglucosamine-1-phosphate transferase, gamma subunit	0	0.46	0.87	0.42	0.83	0.52	0	0.3	NM_032520	0	0.6	0.27	0	0	0	0.13	0	NM_172529
GNS	glucosamine (N-acetyl)-6-sulfatase (Sanfilippo disease IIID)	0.69	2.76	1.97	0.42	0.41	1.04	0.95	0.9	NM_002076	0.37	0.24	0.4	1.05	0.68	0.29	0.67	0.99	NM_029364
GOLGA4	golgi autoantigen, golgin subfamily a, 4	0	0.46	0.44	0.42	0	0	0.19	0.15	NM_002078	0	0.6	0.13	0.12	0.11	0.2	0	0	NM_018748
GORASP2	golgi reassembly stacking protein 2, 55kDa	0.69	0	0.44	0.42	0.41	0	0.76	0.15	NM_015530	0	0	0.13	0.12	0	0.2	0.13	0.14	NM_027352
GOSR2	golgi SNAP receptor complex member 2	0	0	0	0	0	0	0.19	0	NM_004287	0	0	0.4	0	0.11	0	0	0.14	NM_019650
GOT1	Glutamic-oxaloacetic transaminase 1, soluble (aspartate aminotransferase 1)	0	0	0.22	0	0.83	0.35	0.38	0	CR620721	0	0.72	0	0.58	0.91	0.59	0.4	0.43	BC002057
GOT2	glutamic-oxaloacetic transaminase 2, mitochondrial (aspartate aminotransferase 2), nuclear gene encoding mitochondrial protein	0.92	0.23	0.66	0.21	1.86	0.52	0	0.3	NM_002080	1.31	3.1	0.8	4.3	5.47	2.45	4.03	4.11	NM_010325
GPA33	glycoprotein A33 (transmembrane)	1.15	1.38	0.22	0.63	0.62	0.69	0.76	0.6	NM_005814	0	0	0	0	0	0	0	0	NM_021610
GPAA1	glycosylphosphatidylinositol anchor attachment protein 1 homolog (yeast)	0.69	0.92	0.44	0.42	0.21	1.21	0	0.3	NM_003801	1.68	0	0.13	0.23	0.11	0.1	0	0.57	NM_010331
GPBP1	GC-rich promoter binding protein 1	0.23	0	0.22	0.42	0.41	0.35	0.76	0.6	NM_022913	0	0	0.4	0	0.23	0	0	0	NM_028487
GPBP1L1	GC-rich promoter binding protein 1-like 1	0	0.23	0.22	0	0.41	0	0.19	0.3	NM_021639	0.37	0	0	0.35	0	0.15	0.13	0	NM_029868
GPC4	glypican 4	0.46	0	0	0	0	0	0	0	NM_001448	0.56	0.84	0.53	0.12	0.23	0	0.13	0.14	NM_008150
GPD1	glycerol-3-phosphate dehydrogenase 1 (soluble)	0	2.53	3.06	0	0	0.17	0.19	0.45	NM_005276	0.75	2.98	1.99	0	0.34	1.47	0	0	NM_010271
GPD1L	glycerol-3-phosphate dehydrogenase 1-like	0	0.23	0	0.21	0	0.17	0.38	0	NM_015141	0.56	0.12	0.13	0.58	0.57	0.78	1.08	0.28	AK172886
GPI	glucose phosphate isomerase 1	0.69	0.23	0.44	0.42	0.83	0.69	0.76	0.6	NM_000175	0	0.24	0.8	2.33	2.96	0.49	2.55	1.84	NM_008155
GPKOW	G patch domain and KOW motifs	0	0	0	0	0	0	0	0	NM_015698	0.19	0	0	0.12	0.46	0.1	0.13	0.57	NM_173747
GPLD1	glycosylphosphatidylinositol specific phospholipase D1, transcript variant 1	0.69	0.46	0.22	0.21	0.41	0.17	0.38	0.15	NM_001503	0	0	0	0	0	0	0	0	NM_008156
GPR108	G protein-coupled receptor 108	0.23	0	0.44	0.42	0.21	0.69	0.19	0.15	NM_001080452	0.75	0	0.13	0.23	1.14	0.98	0.13	0.57	NM_030084
GPR110	G protein-coupled receptor 110, transcript variant 1	0	0	0	0.84	0	0.17	1.14	0.9	NM_153840	0	0	0	0	0	0	0	0	NM_133776
GPR116	G protein-coupled receptor 116	0	0	0	0	0	0.69	0.15	0	NM_015234	0	0	0.13	0	0	0	0.27	0	NM_001081178
GPR125	G protein-coupled receptor 125	0.23	0	0.22	0.21	0	0	0	0	NM_145290	0.75	0	0.66	0.23	0.23	0.2	0	0.14	XM_132089
GPR137	G protein-coupled receptor 137	0.23	0	0.22	0	0.21	0.35	0.19	0.45	NM_020155	0.56	0	0	0.23	0.34	0.1	0.13	0.71	NM_207220
GPR175	G protein-coupled receptor 175	0.92	0	0	0.21	0.21	0	0	0.15	NM_016372	0	0.12	0	0.23	0.11	0.2	0.27	0.28	NM_011906
GPR177	G protein-coupled receptor 177	0	0	0	0	0	0	0	0	NM_024911	0.56	0.72	0.27	0.47	0.11	0.29	1.08	3.12	NM_026582
GPR177	G protein-coupled receptor 177	0	0.23	0	0	0.21	0	0.19	0.15	NM_001002292	0	0.12	0.13	0	0.11	0	0.13	0.43	AK029053
GPR39	G protein-coupled receptor 39	0	0	0	0	0	0	0	0	NM_024911	0	0	0	0	0	0	0.27	0.57	BC085285
GPR56	G protein-coupled receptor 56	0.23	0.69	0.44	0.63	2.06	1.04	0.76	0.3	NM_005682	4.11	1.19	2.12	6.51	10.82	2.25	17.21	8.79	NM_018882
GPR97	G protein-coupled receptor 97	0	0	0	0	0	0	0	0	NM_170776	0	0	0	0	0.23	0	0.54	0.28	NM_173036
GPRC5B	G protein-coupled receptor, family C, group 5, member B	0.46	0.23	0	0	0	0.52	0.57	0.45	NM_016235	0	0	0	0.12	0	0	1.61	1.84	NM_022420
GPRC5C	G protein-coupled receptor, family C, group 5, member C	0.69	1.15	0.87	1.68	2.27	0.87	3.42	3.62	NM_022036	0	0.12	0	0.12	0	0	0.27	0	NM_147217
GPSM2	G-protein signalling modulator 2 (AGS3-like, C. elegans)	0.46	0.23	0	0.21	0	0.69	0.19	0	NM_013296	0	0	0	0	0.11	0	0	0	NM_029522
GPSN2	glycoprotein, synaptic 2	0.69	1.84	1.75	0.42	2.68	1.38	0.95	2.41	NM_138501	2.06	0.48	0.53	2.21	0.68	0.39	0.81	1.99	NM_134118
GPT	glutamic-pyruvate transaminase (alanine aminotransferase)	0	0.46	0.87	0	0	0	0	0.15	NM_005309	0	0.12	0	0.12	0	0.2	0.4	0.14	NM_182805
GPT2	glutamic pyruvate transaminase (alanine aminotransferase) 2	0	0.69	0	0	0	0.17	0	0.15	NM_133443	0	0	0	0	0	0	0	0	NM_173866
GPX3	glutathione peroxidase 3 (plasma)	6.2	349.01	131.2	1.89	4.54	20.07	3.23	3.77	NM_002084	2.06	32.93	6.9	0	0.23	3.43	0.27	0	NM_008161
GPX5	Glutathione peroxidase 5 (epididymal androgen-related protein)	0.23	0.23	0	0	0.62	0	0.19	0.45	AK093099	0	0	0	0	0	0	0	0	NM_010343
GPX6	glutathione peroxidase 6	0	0	0	0	0	0	0	0.15	NM_182701	0	0	0	2.21	1.37	0.98	0	0	NM_145451
GRAMD1A	GRAM domain containing 1A	0.23	0	0.22	0	0.41	0.35	0	0.3	NM_020895	0.19	0.36	0	0.35	0.68	0.29	0	0.43	NM_027898
GRAMD1B	GRAM domain containing 1B	0	0	0	0	0	0	0	0	NM_020716	0	0.12	0	0	0	0	0.13	0.43	NM_172768
GRAMD1C	GRAM domain containing 1C	0	0	0.22	0.21	0.21	0.35	0.38	0.15	NM_017577	0	0	0	0	0.11	0.1	0	0.14	NM_153528
GRAMD3	GRAM domain containing 3	0.46	0	0	0	0.41	0	0.19	0.6	NM_023927	0	0	0	0	0	0.1	0	0.14	NM_026240
GRB14	growth factor receptor-bound protein 14	0	0.46	0	0.21	0.41	0.69	0	0.45	NM_004490	0.37	0.24	0	0.12	0.23	0.1	0.13	0.28	NM_016719
GRB2	growth factor receptor bound protein 2	0	0.23	0	0.21	0	0	0	0.15	NM_002086	0	0	0.13	0	0.34	0.1	0	0.57	NM_008163
GRB7	growth factor receptor bound protein 7	0	0	0	0.84	0.21	0.17	0	1.51	NM_005310	0.19	1.07	1.46	0.35	0.57	0.39	0.67	0.57	NM_010346
GREM1	Gremlin 1	0	0	0	0	0	0	0	0.75	NM_013372	0	0	0	0	0	0	0.27	0	AK148693
GREM2	gremlin 2 homolog, cysteine knot superfamily (Xenopus laevis)	0	0	0	0	0	0	0	0	NM_022469	0	0	0	0	0	0	0.4	0.99	NM_011825
GRHL2	grainyhead-like 2 (Drosophila)	0	0	0	0	0	0	0	0	NM_024915	0	0	0	0.35	0	0.1	0.13	0.57	NM_026496
GRHPR	glyoxylate reductase/hydroxypyruvate reductase	0.69	4.6	3.94	0.84	0.83	0.69	1.33	0.75	NM_012203	0	0.95	2.26	0.47	0.34	0.2	0.13	0	NM_080289
GRIK5	glutamate receptor, ionotropic, kainate 5 (gamma 2)	0	0	0	0	0.41	0	0	0	NM_002088	0	0	0	0.23	0.23	0	0.27	0.14	NM_008168
GRINA	glutamate receptor, ionotropic, N-methyl D-asparate-associated protein 1 (glutamate binding)	0.23	0.69	3.28	0.42	0.83	1.38	0.57	0.6	NM_000837	1.12	6.08	6.9	1.05	1.48	0.59	0.81	2.13	NM_023168
GRK5	G protein-coupled receptor kinase 5	0.69	0	0	0	0	0.35	0	0.15	NM_005308	0	0	0	0.12	0	0	0.13	0	NM_018869
GRN	granulin	0.23	0.69	0.44	0.21	0.62	0.87	1.33	1.36	NM_002087	0.93	0	0.66	0.58	0.8	0.39	1.48	0.71	NM_008175
GRPEL1	GrpE-like 1, mitochondrial (E. coli)	0.46	0.23	0.44	0.84	1.86	0.69	0.19	0.45	NM_025196	0	0	0	0	0	0	0	0	NM_024478
GRTP1	GH regulated TBC protein 1	0	0.23	0.22	0	0.21	0	0.19	0	NM_024719	0	0.6	0.53	0	0	0	0	0	NM_025768
GSDMDC1	gasdermin domain containing 1	0	0	1.09	0.21	0.41	0.35	0.19	0.15	NM_024736	0	0	0	0	0	0	0	0	NM_026960
GSK3A	glycogen synthase kinase 3 alpha	0	0.23	0	0.42	0	0.17	0.19	0	NM_019884	0	0	0	0.23	0.11	0	0.4	0.28	NM_001031667
GSK3B	glycogen synthase kinase 3 beta	0	0	0	0	0	0	0	0	NM_019884	0.19	0	0	0.23	0	0.1	0.67	0.43	NM_019827
GSN	gelsolin	1.15	0.46	0	0.21	1.45	0.52	0.76	1.05	NM_000177	3.55	0.12	0	0.35	0.34	1.47	2.42	0.85	NM_146120
GSPT1	G1 to S phase transition 1	0	0	0	0	0	0	0	0	NM_002094	0	0.24	0	0.12	0.23	0	0.67	0.99	NM_146066
GSS	glutathione synthetase	0.23	0.69	0.66	0	0	0.17	0.19	0	NM_000178	0.56	2.98	2.79	0.23	0.46	0.39	0.27	0	NM_008180
GSS	glutathione synthetase	0.23	0.69	0.66	0	0	0.17	0.19	0	NM_000178	0.56	2.98	2.79	0.23	0.46	0.39	0.27	0	NM_008180
GSTA1	glutathione S-transferase A1	0.23	8.96	5.69	0	0.83	0.87	0	0	NM_145740	0	0	0	0	0	0	0	0	NM_008181
GSTA3	glutathione S-transferase A3	0	0.46	0.66	0	0.83	0	0	0.15	NM_000847	1.12	5.73	1.06	0.12	0.57	0	0.54	1.84	NM_010356
GSTA4	glutathione S-transferase, alpha 4	0	0	0	0	0	0.17	0	0	NM_001512	3.18	0	0	0.35	1.03	1.18	0.13	0.14	NM_010357
GSTK1	glutathione S-transferase kappa 1	0.46	1.15	2.84	0.84	3.3	0.69	0.95	1.05	NM_015917	0	0.24	0.4	0.23	0.34	0.1	0.13	0.43	NM_029555
GSTK1	glutathione S-transferase kappa 1	0.46	1.15	2.84	0.84	3.3	0.69	0.95	1.05	NM_015917	0	0.24	0.4	0.23	0.34	0.1	0.13	0.43	NM_029555
GSTM3	glutathione S-transferase M3 (brain)	0.23	0	0	0.42	0.83	0	0	0	NM_000849	0	0	0	0	0	0	0	0	NM_010359
GSTM4	glutathione S-transferase, mu 4	0.46	0.92	0.66	0	0.83	0.69	0.38	0.6	NM_000850	0	0	0.4	0	0	0	0	0	NM_026764
GSTM5	glutathione S-transferase, mu 5	0.23	0	0	0.21	0	0	0	0	NM_000851	0	0.6	0.8	0.12	0.23	0.1	0.13	0.28	NM_010360
GSTO1	glutathione S-transferase omega 1	0.46	2.07	0.66	1.05	0.62	1.9	1.33	0.3	NM_004832	0	0.12	0.13	0.7	0.11	0.2	0.13	0.14	NM_010362
GSTT1	glutathione S-transferase, theta 1	0.69	0.92	0.66	0.84	0.62	0.69	1.14	1.05	NM_000853	0.37	0.6	0	1.51	1.37	0.78	4.17	1.56	NM_008185
GSTZ1	glutathione transferase zeta 1 (maleylacetoacetate isomerase)	0	0.23	0	0	0	0.17	0	0.15	NM_145870	0	4.18	3.32	0.47	0	0	0.27	0.28	NM_010363
GTF2A2	general transcription factor IIA, 2, 12kDa	0.23	0	0.22	0	0.21	0.35	0.19	0.3	NM_004492	0.93	0.12	0.13	0.47	0.23	0	0.4	0.14	NM_001039519
GTF2E2	general transcription factor II E, polypeptide 2 (beta subunit)	0	0	0	0	0.21	0	0	0	NM_002095	0.37	0.12	0	0	0	0.29	0	0.14	NM_026584
GTF2F1	general transcription factor IIF, polypeptide 1	0	0.23	0.22	0	0.21	0	0	0	NM_002096	0	0.24	0.66	0.47	0.23	0.29	0.67	0.99	NM_133801
GTF2H1	general transcription factor IIH, polypeptide 1, 62kDa	0.46	0.23	0	0	0	0	0	0	NM_005316	0	0	0	0	0	0	0	0	NM_008186
GTF2H4	general transcription factor II H, polypeptide 4	0.23	0.23	0	0	0.41	0	0	0	NM8001517	0.75	0	0	0	0.23	0.39	0.13	0.14	NM_010364
GTF3A	General transcription factor IIIA	0	0.46	0.44	0.84	0.21	0.17	0.95	0.3	AK057993	0.19	0.12	0	0	0.11	0.1	0.4	0	BC057966
GTF3C1	general transcription factor III C 1	0	0	0	0	0	0.17	0	0.45	NM_001520	1.31	0	0.13	0.7	1.03	1.08	0.81	0.85	NM_207239
GTF3C5	general transcription factor IIIC, polypeptide 5, 63kDa	0	0.23	0.44	0.21	0	0.17	0.19	0.15	NM_012087	0	0	0.27	0.12	0	0.1	0.13	0.28	NM_148928
GTPBP1	GTP binding protein 1	0.46	0.23	0	0	0	0	0.19	0	NM_004286	1.5	0.12	0.13	0.58	0.34	0.1	0.4	0.43	NM_013818
GTPBP2	GTP binding protein 2	0.69	0	0.22	0	0	0.17	0	0.3	NM_019096	0.93	0.12	0.13	0.47	0.34	0.1	0.54	0.71	NM_019581
GUCA2B	guanylate cyclase activator 2b (retina)	0	0	0	0	0	0	0	0	NM_007102	0	9.66	4.65	0	0.23	0.2	0	0.14	NM_008191
GUCY1A3	Guanylate cyclase 1, soluble, alpha 3	0	0	0	0	0.41	0	0.38	0	BX647200	2.24	0	0	0	0	0	0	0	NM_021896
GUK1	guanylate kinase 1	0.46	0.92	1.09	0.84	0.62	0.87	1.71	1.66	NM_000858	0.75	0.48	0.4	1.28	0.8	0.59	0.13	0.57	NM_008193
GULP1	GULP, engulfment adaptor PTB domain containing 1	0.92	0	0	0	0.21	0.17	0	0	NM_016315	0	0	0	0	0	0	0	0	NM_028450
GUSB	glucuronidase, beta	0.23	0	0.22	0	0	0	0	0.3	NM_001181	0	0.12	0.4	0	0	0	0	0	NM_010368
GYLTL1B	glycosyltransferase-like 1B	0	0.23	0	0.42	0.41	0.35	0	0	NM_152312	1.12	0.12	0.27	0.93	1.14	0.1	0.81	1.42	NM_172670
GYS1	glycogen synthase 1, muscle	0	0.87	0	0	0	0	0.19	0.3	NM_002103	0	0.24	0	0.12	0.68	0.1	0.54	0	NM_030678
H1F0	H1 histone family, member 0	1.15	0.23	0.22	1.05	0	0.69	0.95	2.56	NM_005318	2.8	0.36	0.4	0.93	1.25	0.29	1.48	3.4	NM_008197
H1FX	H1 histone family, member X	0.92	0.23	0	0.63	0	0.52	0.57	1.51	NM_006026	0	0	0	0	0.11	0	0.13	0.14	NM_198622
H2AFX	H2A histone family, member X	0	0	0	0	0	0	0	0	NM_002105	0	0.6	0.13	0.12	0.46	0.29	0.54	0.43	NM_010436
H2AFZ	H2A histone family, member Z	0.23	0.23	0.22	0.42	0.62	0.69	0.38	0.3	NM_002106	0.56	1.07	0.4	0.81	0.23	0.49	0.54	0.43	NM_016750
H3F3B	H3 histone, family 3B (H3.3B)	0.46	0	0.22	0.63	0.41	0.52	0	0.15	NM_005324	0.19	0	0	0	0	0	0	0.14	NM_008211
HAAO	3-hydroxyanthranilate 3,4-dioxygenase	0	0.69	0.87	0	0	0.52	0.19	0	NM_012205	0.56	7.99	4.51	0	0.11	0.2	0.13	0	NM_025325
HABP4	hyaluronan binding protein 4	0.46	0	0	0.42	0.41	0	0	0.15	NM_014282	0	0	0.27	0.23	0.57	0.2	0.4	0.28	NM_019986
HACL1	2-hydroxyacyl-CoA lyase 1	0.23	0.23	0.22	0.42	0	0	0	0.15	NM_012260	0	0	0	0	0	0	0	0	NM_019975
HADH	hydroxyacyl-Coenzyme A dehydrogenase, nuclear gene encoding mitochondrial protein	0	1.84	0.44	0.63	0.83	0.69	0.19	0.45	NM_005327	2.06	11.21	5.84	1.28	1.48	1.37	0.27	0.99	NM_008212
HADHA	hydroxyacyl-Coenzyme A dehydrogenase/3-ketoacyl-Coenzyme A thiolase/enoyl-Coenzyme A hydratase (trifunctional protein), alpha subunit, nuclear gene encoding mitochondrial protein	0	0.46	1.31	0.84	0.41	0.17	0.19	0.75	NM_000182	0	0	0	0	0	0	0	0	NM_178878
HADHB	hydroxyacyl-Coenzyme A dehydrogenase/3-ketoacyl-Coenzyme A thiolase/enoyl-Coenzyme A hydratase (trifunctional protein), beta subunit, nuclear gene encoding mitochondrial protein	0.69	0.46	0.44	1.47	1.24	3.29	1.14	1.36	NM_000183	1.5	0.48	0.4	1.98	0.91	0.59	1.08	0.85	NM_145558
HAGH	hydroxyacyl glutathione hydrolase	0.23	0.46	0	0	0	0	0	0.45	NM_005326	0.75	1.79	0.53	1.28	0	0.69	2.02	1.28	NM_024284
HAGHL	hydroxyacylglutathione hydrolase-like	0	0	0	0	0.21	0	0	0	NM_207112	0.75	0.36	0.13	0.12	0.23	0.29	0.13	0.14	NM_026897
HARS	histidyl-tRNA synthetase	0	0	0	0	0	0	0.19	0	NM_002109	0	0.48	0.27	0	0.11	0	0.13	0.28	NM_008214
HAVCR2	hepatitis A virus cellular receptor 2	0.23	0.92	0.22	0	0	0.17	0.19	0	NM_032782	0	0	0	0	0	0	0	0	NM_134250
HAX1	HCLS1 associated X-1	0.23	0	0	0.63	0.21	0.69	0	0.6	NM_006118	0.37	0.12	0.8	0.23	0.11	0.2	0.13	0	NM_011826
HBEGF	heparin-binding EGF-like growth factor	0	0	0.22	0	0.21	0	0	0	NM_001945	0.75	0	0	0	0	0.1	0.4	0.14	NM_010415
HBP1	HMG-box transcription factor 1	0.23	0.23	0.22	0.42	0	0.35	0.19	0	NM_012257	0	0	0	0.12	0	0.1	0.4	0.14	AK136633
HBXIP	hepatitis B virus x interacting protein	2.52	5.97	2.19	0.21	1.65	2.25	2.28	1.51	NM_006402	0	0	0	0	0	0	0	0	CA492714
HCCS	holocytochrome c synthetase	0	0.23	0.22	0	0.41	0	0	0.15	NM_005333	0.56	0.24	0	0.35	0.34	0	0.27	0.28	NM_008222
HCRTR2	hypocretin (orexin) receptor 2	0.69	0.46	0.44	0.21	1.24	0.69	0.19	0.3	NM_001526	0	0	0	0	0	0	0	0	NM_198962
HDAC1	histone deacetylase 1	0.23	0	0.44	0.21	0.21	0.52	0.38	0.15	NM_004964	0	0	0.13	0	0.11	0	0	0	NM_008228
HDAC11	histone deacetylase 11	4.36	3.22	1.31	1.89	2.89	3.11	2.47	1.36	NM_024827	0.37	0	0	0.23	0.11	0.39	2.55	1.99	NM_019572
HDAC2	histone deacetylase 2	0	0	0	0	0.21	0	0	0	NM_001527	0.19	0.48	0.4	0.23	0	0	0	0	NM_008229
HDAC3	histone deacetylase 3	0	0	0	0	0	0	0	0.6	NM_003883	0	0.48	0	0.12	0	0	0	0.43	NM_010411
HDAC6	histone deacetylase 6	0.23	0.92	0	0	0.21	0.17	0.19	0.3	NM_006044	0.75	0.36	0.13	0.12	0.11	0.2	0	0.14	NM_010413
HDAC8	histone deacetylase 8	0	0	0.44	0.21	0.41	0.17	0.38	0	NM_018486	0	0	0	0	0	0.1	0.13	0	NM_027382
HDDC3	HD domain containing 3	0	0	0.22	0	0	0	0.19	0	NM_198527	0.19	0	0.27	0.47	0.23	0.1	0.27	0	NM_026812
HDGF	hepatoma-derived growth factor (high-mobility group protein 1-like)	0.69	0.92	0.22	1.05	0.62	0.17	0.19	0.15	NM_004494	0	0.36	0.27	0.23	0.46	0	0	0.43	NM_008231
HEATR1	HEAT repeat containing 1	0	0	0	0	0	0	0	0	NM_018072	0	0.12	0.13	0	0	0.29	0.4	0.14	NM_144835
HEATR2	HEAT repeat containing 2	0	0.23	0.22	0	0.21	0.17	0	0	NM_017802	1.12	0.12	0	0.23	0	0	0.13	0.14	NM_001081265
HEBP1	heme binding protein 1	0.46	0.23	0.22	0.42	0.21	0.35	1.14	0.45	NM_015987	0	0	0	0	0.11	0	0	0	NM_013456
HECTD1	HECT domain containing 1	0	0.23	0.22	0	0.62	0.17	0.38	0	NM_015382	0.37	0.12	0	0.23	0.11	0.1	0.13	0	XM_974905
HERC1	hect (homologous to the E6-AP (UBE3A) carboxyl terminus) domain and RCC1 (CHC1)-like domain (RLD) 1	0	0	0	0.21	0	0.17	0.38	0	NM_003922	0	0	0	0	0	0	0	0	XM_001477062
HERC2	hect domain and RLD 2	0	0	0	0	0.41	0	0.19	0	NM_004667	0	0	0.27	0.47	0.11	0.1	0.27	0.43	NM_010418
HERC4	hect domain and RLD 4	0	0.23	0.22	0	0.21	0.17	0	0	NM_017802	0	0.84	1.06	0.58	0.34	0.1	0.27	0.14	NM_026101
HERPUD1	homocysteine-inducible, endoplasmic reticulum stress-inducible, ubiquitin-like domain member 1	1.61	1.61	1.75	2.1	1.86	1.56	0.57	0.75	NM_014685	3.18	0.36	2.26	2.21	3.08	5.19	2.82	0.57	NM_022331
HERPUD2	HERPUD family member 2	0.23	0	0	0	0	0.17	0	0	NM_022373	0	0.24	0	0	0.34	0	0.13	0	NM_020586
HES1	hairy and enhancer of split 1 (Drosophila)	1.15	0.23	1.09	0.63	0	0.17	3.23	0.15	NM_005524	0.56	0.12	0	2.68	1.82	1.66	5.78	4.25	NM_008235
HES6	hairy and enhancer of split 6 (Drosophila)	0	0	0	0	0	0	0	0.15	NM_018645	0.75	1.31	0	0.47	0.46	0.59	0.94	1.42	NM_019479
HEXA	hexosaminidase A	0.23	0.23	0.44	0.42	0.21	0.17	0.19	0	NM_000520	0.37	0.12	0	0	0.11	0.1	0.13	1.7	NM_010421
HEXB	hexosaminidase B	1.15	0	0	0	0.41	0.52	0	0.15	NM_000521	0.19	1.67	4.91	0	0	0.29	1.61	1.56	NM_010422
HEXDC	hexosaminidase (glycosyl hydrolase family 20, catalytic domain) containing	0.23	0	0.44	0.42	0.21	0.35	0.19	0.15	NM_173620	0.56	0	0.13	0.23	0.34	0.39	0.54	0.57	NM_001001333
HEYL	hairy/enhancer-of-split related with YRPW motif-like	0	0.23	0	0.21	0.41	0	0.38	0.3	NM_014571	0	0	0	0	0	0	0	0	NM_013905
HGD	homogentisate 1,2-dioxygenase (homogentisate oxidase)	0	0.46	2.84	0	0	0.17	0.19	0.15	NM_000187	0.56	3.1	6.77	0.12	0	0	0.13	0	NM_013547
HGS	hepatocyte growth factor-regulated tyrosine kinase substrate	0.23	0	0	0	0.21	0	0.38	0.15	NM_004712	0.37	0.12	0	0.23	0.11	0.1	0.4	0.57	NM_008244
HHATL	hedgehog acyltransferase-like	0	0.23	0	0	0	0	0	0	NM_020707	0	0	0	0	0.11	0.98	1.34	0	NM_029095
HHEX	hematopoietically expressed homeobox	0.46	0	0	1.05	0	0.52	1.52	1.36	NM_002729	0.75	0.12	0	0	0	0	0.13	0	NM_008245
HIAT1	hippocampus abundant gene transcript 1	0	0	0	0	0.21	0.17	0	0	NM_033055	0.75	0	0	0.12	0.23	0	0.27	0.28	NM_008246
HIBADH	3-hydroxyisobutyrate dehydrogenase	0	0.46	0.87	1.05	0.41	1.04	0.57	0	NM_152740	0	0.84	1.19	1.16	0.57	0.2	0.67	0.99	NM_145567
HIBCH	3-hydroxyisobutyryl-Coenzyme A hydrolase	0.23	1.38	1.09	0.21	0	0.17	0.19	0.3	NM_014362	0	0.24	0.27	0	0.11	0	0.27	0.14	NM_146108
HIGD1A	HIG1 domain family, member 1A	0.23	0	0.44	0.63	0.62	0.52	1.33	1.51	BF790812	0	1.19	0.93	1.63	1.48	0.78	1.75	1.28	NM_019814
HIGD2A	HIG1 domain family, member 2A	0.23	0	0.87	0.63	1.45	0.87	0.95	1.51	NM_138820	2.99	2.74	1.06	3.95	2.39	1.37	3.63	1.99	NM_025933
HINT2	histidine triad nucleotide binding protein 2	0	1.15	1.09	0.84	2.89	1.73	0.57	0.3	NM_032593	0.19	2.03	2.12	1.16	1.6	0.59	1.88	1.28	NM_026871
HINT3	Histidine triad nucleotide binding protein 3	0	0	0	0	0	0.17	0.57	0.45	BX647228	0	0.24	0	0	0.34	0	0	0.14	NM_025798
HIP1R	huntingtin interacting protein 1 related	0.23	0.46	0.66	0.63	0.62	0	0.38	0.6	NM_003959	0	0	0.27	0.12	0.23	0	0.4	0.43	NM_145070
HIPK1	Homeodomain interacting protein kinase 1	0.23	0	0	0	0	0	0	0	NM_198268	0	0	0.13	0.35	0	0	0.27	0.85	AF071070
HIPK2	homeodomain interacting protein kinase 2	0.46	0	0	0	0	0	0	0	NM_022740	0	0	0	0	0	0	0	0	NM_010433
HISPPD2A	histidine acid phosphatase domain containing 2A	0	0.46	0.22	0	0	0	0.19	0.15	NM_014659	0.37	0.36	0.66	1.05	1.03	0.29	0.4	1.28	NM_178795
HK1	hexokinase 1	0	0	0	0	0	0	0.19	0.3	NM_000188	0.56	0	0	0.81	0.46	0.2	0.54	0.85	NM_010438
HLCS	holocarboxylase synthetase (biotin-(proprionyl-Coenzyme A-carboxylase (ATP-hydrolysing)) ligase)	0.23	0.69	0	0.21	0	0.35	0.38	0.3	NM_000411	0	0	0	0	0	0	0.13	0.14	NM_139145
HMBS	hydroxymethylbilane synthase	0	0	0	0.21	0	0	0	0	NM_000180	0	0	0.13	0	0.11	0.39	0.13	0.43	NM_013551
HMG20A	high mobility group 20A	0.23	0	0	0	0	0	0	0	NM_018200	2.06	0.12	0.13	0.12	0.11	0.2	0.27	0	NM_025812
HMG20B	high mobility group 20 B	0.92	1.15	0.87	0.84	0.62	0.35	1.33	0.45	NM_006339	0.56	0.6	0.53	0.12	1.6	0.88	0.13	0.85	NM_010440
HMGB1	high mobility group box 1	0.69	0	0.44	0.63	0.21	0	0	0.15	XR_015985	0.37	0.48	0.13	0.7	0.23	0	0.81	0.99	NM_010439
HMGB1	High mobility group box 1	0	0.23	0	0.21	0	0	0.19	0.15	NM_002128	0.93	0.36	0.4	0.81	0.34	0.49	0.27	0.85	BC064790
HMGB2	high mobility group box 2	0	0.23	0	0	0.62	0.17	0.19	0.15	NM_002129	0.19	0.24	0	0.47	0.34	5.19	2.82	0.14	NM_008252
HMGB3	high mobility group box 3	0	0	0.22	0	0	0	0	0	NM_005342	0	0.24	1.06	0	0	0	0.27	0	NM_008253
HMGCL	3-hydroxy-3-methylglutaryl-Coenzyme A lyase	0.23	1.38	0.22	0.21	0	0.17	0.19	0.15	NM_000191	0	2.03	1.06	0.12	0.34	0.2	0.13	0	AK132035
HMGCR	3-hydroxy-3-methylglutaryl-Coenzyme A reductase	0.23	0.46	0.44	0	0	0.17	0.57	0.3	NM_000859	0	0	0	0	0	0	0.13	0.14	NM_008255
HMGCS1	3-hydroxy-3-methylglutaryl-Coenzyme A synthase 1	0	0.69	0.22	0.21	0.21	0	0.76	1.05	NM_001098272	0.19	0.72	1.19	0.93	0.91	0.29	0.54	0.14	NM_145942
HMGCS2	3-hydroxy-3-methylglutaryl-Coenzyme A synthase 2 (mitochondrial)	0	0	0.22	0.84	0	1.04	3.99	1.51	NM_005518	0	0	0.27	0	0	0	0.54	0	AA209689
HMGN1	high-mobility group nucleosome binding domain 1	8.26	2.3	2.19	3.16	1.03	2.77	5.7	4.52	NM_004965	0.56	0.48	0.27	0.35	0.34	0.2	0.27	0.57	NM_008251
HMGN2	high mobility group nucleosomal binding domain 2	0.23	0	0	0	0	0	0	0.15	NM_005517	0.37	0.48	0.27	0.23	0.8	0.1	0.54	0.43	NM_016957
HMHA1	histocompatibility (minor) HA-1	0.46	0.23	0	0	0	0	0	0.15	NM_012292	0	0	0	0	0.23	0	0	0	NM_027521
HMX2	H6 family homeobox 2	0	0	0.22	0	0	0.35	0.38	0.15	NM_005519	0.19	0	0	0.23	0.11	0.1	0.54	0.14	NM_008258
HNRNPA2B1	Heterogeneous nuclear ribonucleoprotein A2/B1	0.46	0	0.22	1.05	0	0.87	0.38	0.3	BX538099	0	0	0	0	0	0.1	0.13	0	NM_016806
HNRPA0	Heterogeneous nuclear ribonucleoprotein A0	0.46	0	0	0.21	0.21	0	0.19	0.15	NM_006805	0.19	0.12	0	0.35	0	0.2	0.81	0.28	BC023150
HNRPA3	heterogeneous nuclear ribonucleoprotein A3, transcript variant b	0	0	0	0.21	0.62	0.35	0.57	0	NM_194247	0	0.12	0	0	0	0	0.13	0.14	NM_146130
HNRPA3	heterogeneous nuclear ribonucleoprotein A3	0	0	0	0.21	0.62	0.35	0.57	0	NM_194247	0	0.48	0	0.35	0	0	0.54	0.28	NM_198090
HNRPC	heterogeneous nuclear ribonucleoprotein C	0.46	0.23	0	0	0.21	0	0	0.3	NM_031314	0.56	0.48	0.53	0.23	1.03	0.39	1.34	1.13	NM_016884
HNRPDL	heterogeneous nuclear ribonucleoprotein D-like, transcript variant 2	0.69	0.69	0.44	0.42	0.83	0.35	0.19	0.3	NM_031372	0.37	0.24	0.13	0.35	0.46	0.39	0.54	0.14	NM_016690
HNRPF	heterogeneous nuclear ribonucleoprotein F	0	0.23	0	0	0	0.17	0	0	NM_001098208	2.8	1.19	0.93	0.47	0.68	0.1	0.27	0.71	NM_133834
HNRPH1	heterogeneous nuclear ribonucleoprotein H1	0.46	0.23	0	0.21	0.83	0.17	0	0	NM_005520	0.19	0.36	0.13	1.05	0.57	0.29	0.54	0.71	NM_021510
HNRPK	heterogeneous nuclear ribonucleoprotein K	2.29	0.69	0.66	0.42	1.24	0.52	0.95	0.6	NM_002140	0.19	0.48	0.66	0.58	0.23	0.2	0.13	1.28	NM_025279
HNRPL	heterogeneous nuclear ribonucleoprotein L	0.69	0	0.44	0.21	0.21	0.17	0.19	0.45	NM_001533	0.56	0.24	0.27	0.35	0.23	0.29	1.48	1.28	NM_177301
HNRPM	heterogeneous nuclear ribonucleoprotein M	0.23	0	0.22	0.21	0.83	0	1.14	0.3	NM_005968	0.19	0.36	0.4	0.47	0.11	0	1.21	0.99	NM_029804
HNRPR	heterogeneous nuclear ribonucleoprotein R	0.46	0.69	0	0.21	0	0.52	0	0.3	NM_005826	0	0	0	0.12	0.11	0	0	0	NM_028871
HNRPU	heterogeneous nuclear ribonucleoprotein U	0	0	0	0	0	0	0	0	NM_031844	0	0.12	0	1.16	0.34	0.2	0.4	0.99	NM_016805
HNRPUL2	heterogeneous nuclear ribonucleoprotein U-like 2	0.23	0	0	0	0.41	0	0.19	0	NM_001079559	0.93	0.12	0	0.35	0.34	0.1	0.27	0.14	NM_001081196
HOMER3	homer homolog 3 (Drosophila)	0	0.92	0.44	0	0	0.17	0.38	0.3	NM_004838	0	0.24	0.13	0.12	0.11	0.29	0.13	0	NM_011984
HOOK1	hook homolog 1 (Drosophila)	0.23	0	0	0.42	0	0	0	0	NM_015888	0	0	0.13	0	0	0	0	0	NM_030014
HOOK2	hook homolog 2 (Drosophila)	0.23	0.23	0.22	0	0	0.35	0	0.45	NM_013312	0	0.36	0.66	0.12	0.23	0.1	0.27	0.28	NM_133255
HOOK3	Hook homolog 3 (Drosophila)	0	0	0	0	0	0	0	0	NM_032410	0	0	0	0.12	0.11	0	0.27	0	AK170858
HOXB2	homeobox B2	0	0	0	0	0.62	0.17	0.19	0	NM_002145	0.56	0	0	0.23	0.23	0.2	0.54	0.57	NM_134032
HOXB5	homeo box B5	0	0	0	0.21	0	0	0	0	NM_002147	0	0	0	0.23	0	0.39	0	0	NM_008268
HOXB6	homeobox B6	0	0	0	0.42	0	0.17	0.57	0.3	NM_018952	0.37	0	0	0.23	0.11	0.2	1.61	0.85	NM_008269
HOXB7	homeo box B7	0.46	0.23	0	0.21	0	0	0.19	0.3	NM_004502	0.37	0.24	0.53	0.58	0.11	0.2	1.61	0.57	NM_010460
HOXB8	homeo box B8	0	0	0	0	0.21	0	0	0.45	NM_024016	0.75	0	0.27	1.05	1.37	6.56	3.36	2.41	NM_010461
HOXB9	homeo box B9	0	0	0	0.42	0.21	0	0.19	0.45	NM_024017	0	0	0	0.12	0	0	0	0.43	NM_008270
HOXC10	homeobox C10	0.23	0.23	0.44	0.21	0.41	0.17	0.19	0	NM_017409	0.19	0.24	0	0.12	0	0	0	0	NM_010462
HOXD4	homeo box D4	0	0	0	0	0	0	0	0	NM_014621	1.31	0	0	0.12	0.34	0	1.48	0.71	NM_010469
HOXD9	homeo box D9	0	0	0	0	0.62	0	0	0.15	NM_014213	0.56	0	0	0.81	0.34	0.29	0.4	1.28	NM_013555
HP1BP3	heterochromatin protein 1, binding protein 3	0.46	0	0	0.21	0.21	0.35	0.19	0.3	NM_016287	1.68	0.24	0.27	1.05	2.16	0.2	1.48	1.28	NM_010470
HPCAL4	hippocalcin like 4	0	0	0	0	0.41	0.17	0.19	0	NM_016257	0	0	0	0	0	0	0	0	NM_174998
HPD	4-hydroxyphenylpyruvate dioxygenase	0	2.76	2.19	0	0	0	0	0	NM_002150	0	0.46	0.27	0	0	0	0	0	NM_008277
HPGD	hydroxyprostaglandin dehydrogenase 15-(NAD)	1.15	0.69	0.44	0	0	0	0.38	0.15	NM_000860	0	0	0.27	0	0	0	0	0.14	NM_008278
HPN	hepsin	0	1.38	1.53	0	0.21	1.21	0.19	0.75	NM_182983	0.56	1.55	2.39	0.58	1.25	1.37	0.4	0.14	NM_008281
HPRT1	hypoxanthine guanine phosphoribosyl transferase 1	0	0	0.22	0.42	0	0	0.19	0	NM_000194	0.19	0	0	0.23	0.11	0	0.4	0.14	NM_013556
HRASLS3	HRAS-like suppressor 3	0	0.46	0	0	0	0	0	0	NM_007069	0.37	0	0	0	0	0.1	0.27	0	NM_139269
HRBL	HIV-1 Rev binding protein-like, transcript variant 2.	0	0	0	0	0	0	0	0.15	NM_006076	0	0.48	0.13	0.47	0.34	0.59	0.81	0.71	NM_178162
HRH1	histamine receptor H 1	0.23	0	0	0	0	0	0	0	NM_001098213	0	0.12	0	0	0	0	0	0.57	NM_008285
HRH4	histamine receptor H4	0.46	0	0	0	0	0.17	0	0	NM_021624	0	0	0	0	0	0	0	0	NM_153087
HRSP12	heat-responsive protein 12	0.46	5.28	6.12	1.05	0	0.69	0.57	0.45	NM_005836	0.37	11.81	5.05	0.81	1.6	3.33	0.4	0.28	NM_008287
HS6ST1	heparan sulfate 6-O-sulfotransferase 1	0.23	0.23	0	0.42	0.21	0.17	0.57	0.6	NM_004807	0	0.12	0	0.93	0.46	0	0.67	0.85	NM_015818
HSBP1	heat shock factor binding protein 1	0.92	0.46	0.44	1.26	1.24	0.35	0.95	0.45	NM_001537	1.87	0.6	0.53	1.16	0.91	2.06	1.34	1.7	NM_024219
HSCB	HscB iron-sulfur cluster co-chaperone homolog (E. coli)	0.46	0.23	0.44	0.21	0.21	0.17	0.38	0.6	NM_172002	0.56	0.95	0.4	0.23	0.46	0.2	0.4	0.99	NM_153571
HSD11B2	hydroxysteroid (11-beta) dehydrogenase 2	0	0	0.87	1.05	2.27	6.4	9.12	4.22	NM_000196	3.74	0	0.13	0.35	0.11	0.39	27.15	26.66	NM_008289
HSD17B10	hydroxysteroid (17-beta) dehydrogenase 10	0.46	0.69	0.87	0.63	0.41	0	0.57	0.45	NM_004493	0	0.36	0.27	0.58	0.34	0.2	1.08	0.71	NM_016763
HSD17B11	hydroxysteroid (17-beta) dehydrogenase 11	0	0	0	0	0	0	0	0	NM_016245	0.56	13.48	24.56	0.58	2.05	3.53	4.7	5.1	NM_053262
HSD17B12	hydroxysteroid (17-beta) dehydrogenase 12	0.92	0.23	0	0.21	1.03	0.87	0.19	0.6	NM_016142	0	0.36	0	0.35	0.11	0.29	0.67	0.85	NM_019657
HSD17B14	hydroxysteroid (17-beta) dehydrogenase 14	0	0.23	0.66	0	0	0	0.19	0	NM_016246	0	0	0.13	0.58	0.23	0.1	0.27	0.57	NM_025330
HSD17B4	hydroxysteroid (17-beta) dehydrogenase 4	0.69	0.69	1.09	0.84	0	0.69	0.57	0.6	NM_000414	0	1.31	1.06	0.81	0.11	0.2	0.13	0.57	NM_008292
HSD17B7	hydroxysteroid (17-beta) dehydrogenase 7	0.23	0.23	0.22	0.42	0	0.17	0.19	0.15	NM_016371	0	0.12	0.4	0.23	0	0	0	0	NM_010476
HSD3B2	hydroxy-delta-5-steroid dehydrogenase, 3 beta- and steroid delta-isomerase 2	0	0	0	0	0	0	0	0	NM_000198	0	1.91	0.8	0	0.23	0.1	0.4	0.57	NM_153193
HSF1	heat shock transcription factor 1	0.69	0.23	0.22	0.42	0.21	0.52	0.76	0.3	NM_005526	0.93	0.24	0.13	0	0.11	0.1	0.13	0	NM_008296
HSF2	heat shock transcription factor 2	0.23	0	0.44	0.21	0.21	0.17	0.38	0.3	NM_004506	0	0	0	0	0	0	0	0	NM_008297
HSP90AA1	heat shock protein 90kDa alpha (cytosolic), class A member 1	2.52	5.05	3.94	1.89	2.06	2.6	1.71	3.62	NM_001017963	0	0.72	1.46	1.28	0.46	0.39	0.27	1.56	NM_010480
HSP90AB1	heat shock protein 90kDa alpha (cytosolic), class B member 1	1.61	0.46	0.87	1.26	1.65	1.9	2.85	1.66	NM_007355	8.41	13	19.78	3.49	4.44	2.74	2.69	9.36	NM_008302
HSPA12A	heat shock 70kDa protein 12A	0.46	0.23	0.44	0	0.41	0.35	0.19	0	NM_025015	0.93	0	0	0.12	0	0	0	0	NM_175199
HSPA14	heat shock protein 14, transcript variant 1	0.23	0	0.44	0	0	0.17	0.19	0.3	NM_016299	0.19	0.72	0	0.35	0.68	0.1	0.4	0.43	NM_015765
HSPA4	heat shock 70kDa protein 4	0.92	0.23	0.44	0	0.62	0.17	0.95	0.15	NM_002154	0.75	0.12	0	0.58	0.46	0	0.13	0.43	NM_008300
HSPA5	heat shock protein 5	0.46	0.23	0	0.21	0	0	0	0.15	NM_005347	2.06	0.72	0.27	1.4	0.34	0.2	0.4	0.14	NM_022310
HSPA8	heat shock protein 8	2.75	3.68	6.56	5.68	8.26	5.19	2.66	1.51	NM_006597	3.55	16.7	10.89	8.49	6.38	2.74	8.47	6.24	NM_031165
HSPA9	heat shock 70kDa protein 9 (mortalin), nuclear gene encoding mitochondrial protein	0.23	1.84	0.66	0.63	0.41	1.38	0.38	0.6	NM_004134	0	0.36	0	0.12	0.11	0	0	0	NM_010481
HSPB1	heat shock 27kDa protein 1	2.07	2.76	4.15	2.52	2.89	4.5	2.85	9.64	NM_001540	3.92	0.36	0	0.58	0.46	0	0.27	0	NM_013560
HSPC171	HSPC171 protein	0.23	0	0	0	0.21	0	0	0	NM_014187	0.37	3.1	1.46	0.35	0.34	0.1	0	0.71	NM_025486
HSPG2	heparan sulfate proteoglycan 2	0.69	0	0.22	0.42	0	0.17	0.57	0.9	NM_005529	0.93	0	0	0.47	0.57	0.1	0.4	1.7	XM_978879
HTATIP	HIV-1 tat interactive protein, homolog (human)	0.23	0.23	0	0.21	0.41	0.35	0.57	0.15	NM_182710	0.75	0.12	0.4	0	0.34	0	0.13	0	BC110675
HTATIP2	HIV-1 tat interactive protein 2, homolog (human)	0.46	0.46	0	0	0	0.17	0	0.3	NM_001098520	0.56	0	0	0.35	0.11	0	0.54	0.14	NM_016865
HTATSF1	HIV TAT specific factor 1	0	0	0	0	0	0	0.19	0.3	NM_014500	0.56	0	0.13	0	0.11	0.1	0	0.57	NM_028242
HTR5A	5-hydroxytryptamine (serotonin) receptor 5A	0.69	0	0.22	0.42	0	0.17	0	0.15	NM_024012	0	0	0	0	0	0	0	0	NM_008314
HTRA1	HtrA serine peptidase 1	12.62	0	0.22	0	0	0.17	0	0	NM_002775	4.11	0	0.13	0	0	0.1	0	0	NM_019564
HUS1	HUS1 checkpoint homolog	0.92	0.23	0	0.21	0.62	0.17	1.14	0.3	CR619988	0	0	0.13	0	0	0	0	0	NM_008316
HYI	hydroxypyruvate isomerase homolog (E. coli)	0.23	0.92	0.44	0	0	0.17	0.38	0.6	NM_031207	0.19	0.48	0.53	0	0	0	0	0	NM_026601
HYOU1	hypoxia up-regulated 1	0.46	0.23	0	0	0.21	0.17	0.19	0.15	NM_006389	0	0	0	0	0	0	0	0	NM_021395
IARS	isoleucine-tRNA synthetase	0	0.69	0.22	0.21	0.62	0	0.19	0.15	NM_013417	0.75	0.12	0.13	0.12	0.11	0	0.27	0.57	NM_172015
ICMT	isoprenylcysteine carboxyl methyltransferase	0.23	0	0.22	0.63	0.21	0.17	0.57	0.15	NM_012405	0.37	1.31	0.53	0.47	0.34	0.1	0.54	1.13	NM_133788
ID1	inhibitor of DNA binding 1	2.98	0	0.22	1.05	0.21	1.04	5.32	10.09	NM_002165	0.19	0.84	0.13	0.35	0.23	0	0.13	0.85	NM_010495
ID2	inhibitor of DNA binding 2	0.69	0.46	0.44	1.89	1.24	1.04	1.9	0.75	NM_002166	5.79	1.19	1.73	1.16	2.85	4.11	8.87	3.26	NM_010496
ID4	inhibitor of DNA binding 4, dominant negative helix-loop-helix protein	1.38	0.69	0	0.21	0.41	0.52	0.38	0.75	NM_001546	0.37	0	0	0.12	0	0	0	0.28	NM_031166
IDE	insulin degrading enzyme	0	0.46	0	0	0.21	0	0.19	0.3	BX648462	1.68	0.36	0.27	0.58	0.23	0	0.4	0.43	NM_031156
IDH1	isocitrate dehydrogenase 1 (NADP+), soluble	0	0.46	0.66	0	0	0.35	0.38	0.3	NM_005896	0	2.03	0.4	0.12	0.23	0.1	0.67	0.28	NM_010497
IDH2	isocitrate dehydrogenase 2 (NADP+), mitochondrial	0	0.46	0.22	1.47	1.65	1.21	0.57	0.45	NM_002168	1.68	2.03	1.33	14.89	7.63	2.84	4.3	9.36	NM_173011
IDH3B	isocitrate dehydrogenase 3 (NAD+) beta	0.23	1.15	1.31	0.63	2.48	1.21	0.38	0.9	NM_006899	2.06	0.84	0.53	2.68	4.1	3.82	3.23	1.13	NM_130884
IDH3G	isocitrate dehydrogenase 3 (NAD+), gamma	0.23	1.84	1.31	1.26	0.21	0.87	0.19	0.6	NM_004135	1.31	0.36	0	0.81	0.91	1.37	0.94	0.71	NM_008323
IDI1	isopentenyl-diphosphate delta isomerase 1	0.92	0.46	0	0.21	1.03	0.17	0.76	0.9	NM_004508	0	1.19	5.58	0.12	0	0.2	0	0.14	NM_177960
IDUA	iduronidase, alpha-L-	0	0	0	0	0	0.17	0	0	NM_004135	0	0	0	0	0.34	0	0.27	0.28	NM_008325
IER2	immediate early response 2	1.15	0.23	0.87	0.84	1.03	0.52	2.28	2.11	NM_004907	0	0	0	0	0	0	0	0	NM_010499
IER3	immediate early response 3	5.51	1.84	2.62	6.1	8.67	10.9	49.4	45.65	NM_003897	0.75	0	0.13	0.12	0.46	0.2	0.4	0.43	NM_133662
IER3IP1	immediate early response 3 interacting protein 1	0.23	0	0.22	0	0	0	0.19	0.15	NM_016097	0.75	0.48	0.13	0.23	0.46	0.49	0.27	0.43	NM_025409
IER5	immediate early response 5	0	0	0	0	0.21	0	0	0	NM_016545	1.87	0	0	0.23	0.23	0.2	0	0.57	NM_010500
IER5L	immediate early response 5-like	0	0	0	0	0	0	0	0	NM_204435	0	0	0	0.35	0.46	0.1	0.54	1.13	NM_030244
IFI30	interferon, gamma-inducible protein 30	0.46	0.46	0.22	1.26	3.72	1.21	0.95	0.3	NM_006332	0	0.24	0	0	0.23	0.49	0.27	0.43	NM_023065
IFI35	interferon-induced protein 35	0.69	1.61	0	0	1.03	0.87	0.38	0	NM_005533	0.75	0.12	0	0.35	0.68	0.2	0.67	0.28	NM_027320
IFIT1	interferon-induced protein with tetratricopeptide repeats 1, transcript variant 2	0.23	0	0.22	0.84	0.21	0	0	0.15	NM_001548	0	0	0	0	0	0	0	0	NM_008331
IFITM1	interferon induced transmembrane protein 1 (9-27)	2.75	0	0	0	0.41	0.17	0.19	0.15	NM_003641	0	0	0	0	0	0	0	0	NM_026820
IFITM2	interferon induced transmembrane protein 2	0.23	0.23	0.44	0	0.21	0.17	0.19	0	BF210063	0.19	0	0	0.23	0.46	0.49	0.94	0.43	NM_030694
IFNAR2	interferon (alpha, beta and omega) receptor 2, transcript variant 1	0	0.46	0	0	0	0.17	0	0	NM_207585	0	0	0	0	0.11	0	0	0	NM_010509
IFNGR1	interferon gamma receptor 1	0.23	0	0	0.21	0	0.17	0	0.15	NM_000416	0.37	0.12	0.27	0.12	0.34	0.1	0.13	0.28	NM_010511
IFNGR2	interferon gamma receptor 2 (interferon gamma transducer 1)	0.23	0	0.22	0	0.21	0.35	0.38	0.3	NM_005534	0	0.12	0	0	0	0.1	0	0.43	NM_008338
IFRD1	interferon-related developmental regulator 1	0.23	0	0	0	0.21	0.35	0.19	0.3	NM_001550	0	0	0.13	0.12	0	0	0.54	0.43	NM_013562
IFRD2	interferon-related developmental regulator 2	0	0	0.44	0.21	0.21	0	0.19	0.15	NM_006764	0	0.36	0.4	0.12	0	0.1	0	0.14	NM_025903
IFRG15	Interferon responsive gene 15	0	0.46	0.22	0.42	0	0	0	0	BE073457	0.56	0.36	0.27	0	0.23	0.2	0.13	0.14	NM_022329
IFT122	intraflagellar transport 122 homolog (Chlamydomonas)	0	0	0.22	0	0	0.17	0	0.3	NM_052985	0.19	0.36	0.13	0.35	0.46	0.2	0.4	0.14	NM_031177
IFT20	intraflagellar transport 20 homolog (Chlamydomonas)	0.46	0	0	0	0.62	0	0.38	0	NM_174887	0.19	0.6	0.27	1.4	1.48	0.98	0.81	0.14	NM_018854
IFT52	intraflagellar transport 52 homolog (Chlamydomonas)	0	0	0	0	0	0	0	0.15	NM_016004	0	0	0.27	0.47	0.11	0	0.13	0.43	NM_172150
IGBP1	immunoglobulin (CD79A) binding protein 1	0.23	0.46	0.44	0.21	0.21	0.17	0.19	0.3	NM_001551	1.12	1.67	1.33	0.12	0.23	0.2	0.27	1.13	NM_008784
IGF1R	insulin-like growth factor I receptor	0	0.23	0	0.21	0	0	0	0	NM_000875	0.19	0.12	0.27	0.47	0.23	0	0.27	0.28	NM_010513
IGF2R	insulin-like growth factor 2 receptor	0.23	0.46	0.22	0.21	0	0.35	0	0	NM_000876	0	0	0	0	0	0	0	0	NM_010515
IGFBP2	insulin-like growth factor binding protein 2, 36kDa	8.03	0	0	0.21	0.62	0	0.95	0.15	NM_000597	0	0	0	0	0	0	0	0	NM_008342
IGFBP4	insulin-like growth factor binding protein 4	0.69	0.46	0.66	0	0	0	0	0.15	NM_001552	0.75	2.15	0.27	0	0.11	0.59	0	0	NM_010517
IGFBP5	insulin-like growth factor binding protein 5	31.44	1.38	0.22	0	0.41	1.56	2.28	0.6	NM_000599	3.74	0	0	0	0	0.39	0	0	NM_010518
IGFBP7	insulin-like growth factor binding protein 7	119.79	13.33	5.69	38.71	49.96	75.79	47.69	24.11	NM_001553	71.95	5.25	6.37	23.49	18.23	95	34.68	38.57	NM_008048
IGSF5	immunoglobulin superfamily, member 5	0	0	0	0	0	0	0	0	NM_001080444	0	0.24	0	0.35	0.23	0.2	1.21	0.43	NM_028078
IGSF8	immunoglobulin superfamily, member 8	0.23	0	0.66	0.21	0	0.17	1.14	0.6	NM_052868	0	0.12	0	0.12	0.11	0	0.27	0.28	NM_080419
IHH	Indian hedgehog homolog (Drosophila)	0	0.46	0	0.21	0	0.17	0	0	NM_002181	0	0.12	0.13	0	0	0	0	0	NM_010544
IHPK1	inositol hexaphosphate kinase 1	0	0.23	0.22	0.63	0.21	0.17	0.19	0	NM_153273	0	0	0	0.23	0.46	0.1	0.54	0.28	NM_013785
IHPK2	inositol hexaphosphate kinase 2	0.23	0.465	0	0.21	0.41	0	0	0.3	NM_016291	1.31	0	0	0.23	0.11	1.96	0.67	0	NM_029634
IK	IK cytokine, down-regulator of HLA II	0.46	0.69	0	0	0.41	0.17	0.38	0.3	NM_006083	0.75	0.48	0.53	0.7	0.34	0.2	0.13	0.99	NM_011879
IKBKB	inhibitor of kappa light polypeptide gene enhancer in B-cells, kinase beta	0.69	0	0.22	0.21	0.21	0.17	0	0	NM_001556	0	0	0	0	0	0	0	0	NM_010546
IKZF5	IKAROS family zinc finger 5	0	0	0	0	0	0	0	0	NM_022466	1.12	0	0	0.23	0.68	0	0.54	0.14	NM_175115
IL10RB	interleukin 10 receptor, beta	0.46	0	0.22	0	0	0	0	0	NM_000628	0	0.12	0	0.23	0.11	0	0.27	0	NM_008349
IL12B	interleukin 12b	0	0	0	0	0	0	0.19	0	NM_002187	2.99	2.03	1.33	3.26	2.39	0.59	2.02	2.69	NM_008352
IL13RA1	interleukin 13 receptor, alpha 1	0.23	0	0	0	0.21	0	0	0.15	NM_001560	0	0.12	0.27	0.23	0.11	0.2	0.27	0.43	NM_133990
IL13RA2	interleukin 13 receptor, alpha 2	0.46	0	0	0	0	0	0	0	NM_000640	0	0	0	0	0	0	0	0	NM_08356
IL17RB	interleukin 17 receptor B	0.23	2.3	2.62	0	0	0.17	0	0.3	NM_018725	0	0	0	0	0	0	0.13	0	NM_019583
IL18	interleukin 18 (interferon-gamma-inducing factor)	0.23	0.46	0	0.21	0.41	0.69	1.33	0.75	NM_001562	0.56	0	0	0.23	0.68	0.88	0.27	0.14	NM_134159
IL1B	interleukin 1, beta	0.46	0	0	0	0	0	0	0	NM_000576	0	0	0	0	0	0	0	0	NM_008361
IL1R1	interleukin 1 receptor, type I	0.69	0	0.22	0	0.41	0	0	0.3	NM_000877	0.19	0	0	0	0	0	0.27	0.71	NM_008362
IL1RL1	interleukin 1 receptor-like 1, transcript variant 2	0.46	0	0	0	0	0	0	0.15	NM_003856	0	0	0	0	0	0	0	0	NM_010743
IL2	interleukin 2	0	0.23	0.22	0.21	0.41	0	0.19	0	NM_000586	0	0	0	0	0	0	0	0	NM_008366
IL31RA	interleukin 31 receptor A	0	0	0	0	0	0	0.38	0	NM_139017	0	0	0	0	0	0	0	0	NM_139299
IL6ST	Interleukin 6 signal transducer (gp130, oncostatin M receptor)	0	0	0	0.21	0.41	0	0.19	0.15	BC071555	0	0	0	0.12	0.23	0	0	0	NM_010560
IL8	interleukin 8	0.92	0	0	0	0	0	0	0.75	NM_000584	0	0	0	0	0	0	0	0	NM_178241
IL8RA	interleukin 8 receptor, alpha	0.46	0	0	0	0.21	0	0	0	NM_000634	0	0	0	0.35	0.23	0.29	0.27	0	NM_134109
ILF2	interleukin enhancer binding factor 2, 45kDa	0.23	0.92	1.09	0.84	0.62	0	0.38	0.15	NM_004515	0.93	0	0	0.12	0	0	0.13	0	NM_026374
ILF3	interleukin enhancer binding factor 3, 90kDa, transcript variant 1	0	0	0	0.21	0.21	0.35	0.19	0	NM_012218	0.19	0.36	0.27	0	0.11	0	0	0	NM_010561
ILK	integrin linked kinase	2.98	1.61	0	1.68	1.03	1.56	0.76	3.31	NM_004517	1.31	0.84	0.27	0.35	0.34	0.49	0	0.85	NM_010562
ILKAP	integrin-linked kinase-associated serine/threonine phosphatase 2C	0	0	0	0.21	0.21	0.17	0.38	0.15	NM_030768	0	0	0.27	0.12	0.57	0.1	0.13	0.14	NM_023343
ILVBL	ilvB (bacterial acetolactate synthase)-like	0.46	0.46	1.31	0.42	0.83	1.21	0.57	0.3	NM_006844	1.5	0.84	0.13	0.58	0.91	0.78	0.67	0.57	NM_173751
IMMP1L	IMP1 inner mitochondrial membrane peptidase-like (S. cerevisiae)	0	0	0	0	0	0	0	0	NM_144981	0	0	0	0.12	0.23	0.1	0.4	0.14	NM_028260
IMMT	inner membrane protein, mitochondrial	0.46	1.38	0.66	0	0.21	0	0.57	0	NM_006839	2.43	3.34	2.52	2.68	2.16	1.37	1.08	2.27	NM_029673
IMP3	IMP3, U3 small nucleolar ribonucleoprotein, homolog (yeast)	0.92	0	0.44	0	0.41	0	0.57	0.15	NM_018285	0	0.72	0.13	0.58	0.46	0.1	0.54	0.57	NM_133976
IMPA1	inositol(myo)-1(or 4)-monophosphatase 1	0	0	0	0.21	0	0	0.38	0.15	NM_005536	0	0	0.13	0.47	0.57	0.2	0.4	0.57	NM_018864
IMPA2	inositol(myo)-1(or 4)-monophosphatase 2	0.23	4.83	4.37	2.95	7.02	2.6	1.33	0.75	NM_014214	0	0	0	0.12	0.57	0.2	0	0	NM_053261
IMPDH2	IMP (inosine monophosphate) dehydrogenase 2	0.92	0.46	0.44	0.21	0.83	0.17	0.38	1.05	NM_000884	0.93	0.36	0	0	0.23	0.2	0.13	0.28	NM_011830
IMPG1	interphotoreceptor matrix proteoglycan 1	0.23	0.46	0	0	0	0.17	0	0	NM_001563	0	0	0	0	0	0	0	0	NM_022016
INADL	InaD-like (Drosophila), transcript variant 4	0	0.23	0.22	0	0	0.35	0	0.15	NM_176877	0	0	0	0	0	0	0.4	0.14	NM_001005787
ING1	inhibitor of growth family, member 1	0	0.46	0	0.42	0.21	0.35	0.57	0.3	NM_198219	0	0.12	0	0	0.46	0	0.81	0	NM_011919
ING3	inhibitor of growth family, member 3, transcript variant 3	0	1.15	0	0.63	0.62	1.38	0.95	0.75	NM_198267	0	0	0	0	0	0	0	0	NM_023626
ING4	inhibitor of growth family, member 4	0.23	0	0.44	0.21	0.21	0.35	0.38	0.15	NM_016162	1.5	0	0	0	0	0	0.27	0	NM_133345
INMT	indolethylamine N-methyltransferase	0.23	0	0	0	0	0	0	0	NM_006774	0	2.62	0.8	0	0.11	0	0	0	NM_009349
INPP5F	inositol polyphosphate-5-phosphatase F, transcript variant 1	0.23	2.07	2.19	0.63	1.65	0.69	0.95	2.26	NM_014937	0	0	0.13	0	0.23	0	0	0	NM_178641
INPPL1	inositol polyphosphate phosphatase-like 1	0.23	0.69	0.44	0	0.21	0	0.19	0.15	NM_001567	0.93	0.48	0.53	1.16	1.03	0.69	1.61	1.99	NM_010567
INSIG1	insulin induced gene 1	0.92	0	0.66	0.42	0.62	0	0	0.45	NM_005542	0	2.51	1.06	0.23	0.8	0.1	0	0.28	NM_153526
INSIG2	insulin induced gene 2	0.92	0	0	0.21	0	0	0.19	0.3	NM_016133	0	0	0	0	0	0	0.4	0.14	AK154543
INSRR	insulin receptor-related receptor	0	0	0	0	0	0	0.19	0	NM_014215	0.19	0	0	0	0	0	1.08	0.14	NM_011832
INTS1	integrator complex subunit 1	0.69	0.92	0	0.84	0.21	0.52	0.76	1.05	NM_001080453	0.19	0	0	0	0	0	0.27	0	NM_026748
INTS10	integrator complex subunit 10	0.23	0	0.22	0.63	0.41	0.35	1.52	0.15	NM_018142	0.19	0.12	0	0.23	0.11	0.1	0.27	0.28	NM_027590
INTS2	integrator complex subunit 2	0	0	0.22	0	0	0	0	0	NM_020748	0.37	0.24	0	0.23	0.11	0.2	0.4	0	NM_027421
INTS5	integrator complex subunit 5	0	0	0	0	0.21	0	0	0	NM_030628	1.31	0	0.27	0	0.11	0.39	0.4	0	NM_176843
INTS9	integrator complex subunit 9	0.23	0.23	0	0	0	0	0	0	NM_018250	0	0	0	0.12	0.11	0.39	0.13	0.14	NM_153414
IPO13	importin 13	0	0.23	0	0.42	0.21	0.17	0.19	0.3	NM_014652	1.5	0.24	0.13	1.05	1.03	0.69	2.02	0.85	NM_146152
IPO4	importin 4	0	0.46	0.66	0.21	0.21	0.17	0.19	0	NM_024658	0.75	0	0.13	0.35	0.11	0.29	0.27	0.28	NM_024267
IPO7	importin 7	0	0.46	0	0	0	0	0	0	NM_006391	0	0	0	0	0	0	0	0	NM_181517
IQCK	IQ motif containing K	0.23	0	0.22	0.63	0.41	0.35	0.57	0.15	NM_153208	0.19	0.48	0.27	0.12	0.23	0	0.13	0	NM_001081113
IQGAP1	IQ motif containing GTPase activating protein 1	0.23	0	0	0.21	0.62	0.17	0.57	0.6	NM_003870	0	0	0	0.12	0	0	0.27	0.28	NM_016721
IQGAP2	IQ motif containing GTPase activating protein 2	0.23	0	0.22	0.42	0	0.35	0.38	0	NM_006633	0	0	0	0.23	0	0	0.4	0.57	NM_027711
IQSEC2	IQ motif and Sec7 domain 2	0	0	0	0	0	0	0	0	NM_015075	0	0	0	0	0.11	0.39	0	0.28	NM_001005475
IRAK1	interleukin-1 receptor-associated kinase 1	0.23	0	0	0.21	0.21	0.17	0	0.15	NM_001569	0	0.12	0.4	0.12	0.11	0.1	0	0.14	NM_008363
IREB2	iron-responsive element binding protein 2	0.92	0.69	1.97	1.68	3.3	1.73	1.33	1.05	NM_004136	0	0	0	0.23	0	0	0	0	NM_022655
IRF1	interferon regulatory factor 1	1.84	0.23	0.44	0.63	0.21	0.52	0.38	1.66	NM_002198	0	0	0	0	0.11	0.1	0	0.28	Nmàà_"çà
IRF2BP1	interferon regulatory factor 2 binding protein 1	0	0	0	0	0	0.17	0	0	NM_001569	0	0	0	0.58	0.57	0.39	0.4	0	NM_178757
IRF3	interferon regulatory factor 3	0	0.23	0	0	0	0	0.38	0.15	NM_001571	1.5	0	0.13	0.23	0.57	0.1	0.54	0.57	NM_016849
IRF6	interferon regulatory factor 6	0	0	0	0.21	0	0	0.38	0.15	NM_006147	0	0.24	0	0.12	0.11	0	0	0	NM_016851
IRGQ	immunity-related GTPase family, Q	0	0	0	0	0	0	0	0	NM_001007561	1.5	0.24	0.13	0.23	0.11	0	0	0.43	NM_153134
IRS1	insulin receptor substrate 1	1.15	0.23	0.87	0.21	0.21	0.35	0.19	0.15	NM_005544	0	0	0	0	0	0	0	0	NM_010570
IRS2	insulin receptor substrate 2	0	0.23	0	0.42	0.41	0.17	0.19	0	NM_003749	0	0	0	0	0	0	0	0	NM_001081212
IRX1	Iroquois related homeobox 1 (Drosophila)	0	0	0.22	1.26	0.21	0.17	0	0	NM_024337	0	0	1.06	0.7	1.48	0	0	0	NM_010573
IRX3	Iroquois related homeobox 3 (Drosophila)	0	0	0.66	0	0.21	0	0	0	NM_024336	0.56	0.12	0	0.12	0.11	0.39	0.13	0	NM_008393
ISCA2	Iron-sulfur cluster assembly 2 homolog (S. cerevisiae)	0	0	0	0	0	0	0	0	NM_194279	0	0.12	0.27	0.23	0.34	0.29	0.81	0.57	BC022589
ISG15	ISG15 ubiquitin-like modifier	3.44	0	0	0.21	0.21	0	0.38	0.75	NM_005101	0	0.12	0	0.12	0.11	0.2	0	0.43	NM_015783
ISL2	ISL LIM homeobox 2	0.46	0.46	0	0	0	0	0	0.15	NM_145805	0	0	0	0	0	0	0	0	NM_027397
ISOC1	Isochorismatase domain containing 1	0.23	0	0.66	0.21	0.21	0.35	0	0.15	NM_016048	1.87	0.48	0.13	0.7	0.46	0.59	1.21	1.56	AV077023
ISOC2	isochorismatase domain containing 2	0	2.3	0.87	0	0.41	0.17	0.19	0.6	NM_024710	0.56	0.12	0.4	0.12	0.46	0	0.27	0.28	NM_133934
ISYNA1	myo-inositol 1-phosphate synthase A1	0.69	0.23	0	1.47	0.41	0.35	0.38	0.15	NM_016368	3.92	0	0	1.98	2.16	9.01	3.09	0.71	NM_023627
ITCH	itchy, E3 ubiquitin protein ligase	0	0	0	0	0	0	0	0	NM_031483	0.19	0.36	0	0.47	0.34	0	0.4	0.71	NM_008395
ITFG1	integrin alpha FG-GAP repeat containing 1	0	0.23	0.44	0	0.41	0.35	0.57	0.3	NM_030790	0	0.72	0.27	0.35	0	0.1	0	0.14	NM_028007
ITFG3	integrin alpha FG-GAP repeat containing 3	0.46	0.23	0.22	0.42	0.21	0.17	0	0.15	NM_032039	0.37	0.6	0.53	0.23	0.68	0.39	0.81	0.99	NM_207217
ITGA2	integrin, alpha 2 (CD49B, alpha 2 subunit of VLA-2 receptor)	0	0	0	0.63	0	0	0.38	0	NM_002203	0	0	0	0	0	0	0	0	NM_008396
ITGA3	integrin alpha 3	1.61	0	0	0.21	0	0	0	0.15	NM_002204	1.31	0	0.13	0.35	0	0	0	0.57	NM_013565
ITGAE	integrin, alpha E (antigen CD103, human mucosal lymphocyte antigen 1; alpha polypeptide)	1.15	0	0	0	0	0.17	0.38	0.45	NM_002208	0	0	0	0	0	0	0	0	NM_172944
ITGAV	integrin, alpha V (vitronectin receptor, alpha polypeptide, antigen CD51)	3.21	0.69	1.31	0.42	2.27	0.35	0.95	0.9	NM_002210	3.74	1.55	2.92	1.51	3.19	1.57	3.09	1.7	NM_008402
ITGB1	integrin, beta 1 (fibronectin receptor, beta polypeptide, antigen CD29 includes MDF2, MSK12), transcript variant 1A	4.36	0.23	0.66	0.42	0.21	0.52	0.95	0.75	NM_002211	0	0	0	0.12	0.11	0	0	0.14	NM_010578
ITGB5	integrin beta 5	0.69	0.69	0	0.63	0.41	0.52	0.57	0	NM_002213	0.75	0.48	0	0.12	0.46	5.09	1.21	0.57	NM_010580
ITGB8	integrin, beta 8	1.61	0.23	0.66	0.63	0.41	0.17	0	0.15	NM_002214	0	0	0	0	0	0	0	0	NM_177290
ITIH4	inter-alpha (globulin) inhibitor H4 (plasma Kallikrein-sensitive glycoprotein)	0	0.23	0.44	0	0	0.35	0.19	0	NM_002218	0	0	0	0	0	0	0	0	NM_018746
ITM2A	integral membrane protein 2A	0	0	0	0	0	0	0	0	NM_002204	0	0	0	0.23	0	0	0.54	1.13	NM_008409
ITM2B	integral membrane protein 2B	42.91	8.04	15.52	15.36	19.2	12.81	7.41	14.46	NM_021999	41.12	2.86	4.65	15.93	10.37	14.98	22.45	26.66	NM_008410
ITM2C	integral membrane protein 2C	1.38	0.23	0.66	1.47	1.45	1.73	1.71	1.96	NM_030926	4.49	0.72	0.4	0.7	0.8	1.18	1.48	2.13	NM_022417
ITPA	inosine triphosphatase (nucleoside triphosphate pyrophosphatase)	0	0	0.22	0.42	0	0	0	0.75	NM_033453	0.37	0.6	0.13	0.47	0.57	0.1	0	0.43	NM_025922
ITPKB	Inositol 1,4,5-trisphosphate 3-kinase B	0	0	0	0.42	0	0	0	0	NM_002221	0	0	0	0.12	0	0	0.27	0.14	CF583201
ITPR1	inositol 1,4,5-triphosphate receptor 1	0	0	0	0	0	0	0	0	NM_001099952	0	0.36	0.13	0.35	0	0.2	0.27	0.57	NM_010585
ITPR2	Inositol 1,4,5-triphosphate receptor 2	0	0.23	0	0	0.21	0.17	0.19	0.3	NM_002223	0	0	0	0.12	0.23	0	0.54	0.14	AK046210
ITSN2	intersectin 2	0	0.46	0	0.21	0	0	0	0	NM_006277	0.19	0.12	0.53	0.12	0.34	1.08	0.4	0.14	NM_011365
IVD	isovaleryl coenzyme A dehydrogenase	0	0.23	0.22	0	0	0.17	0.19	0	NM_002225	1.31	1.91	2.66	0.7	1.82	1.27	1.34	0.99	NM_019826
IVNS1ABP	influenza virus NS1A binding protein	0.23	0.23	0.87	1.89	0	1.04	1.14	0.75	NM_006469	2.24	0.36	0.4	1.05	0.91	0.2	1.34	1.42	NM_054102
IWS1	IWS1 homolog (S. cerevisiae)	0	0.46	0.22	0.21	0	0.17	0	0	NM_017969	0	0	0	0	0	0	0.27	0	NM_173441
JAG1	jagged 1	0.23	0	0	0	0.21	0.17	0.19	0.15	NM_000214	0.19	0	0.13	0.35	0.46	0.1	0.81	0.14	NM_013822
JAGN1	jagunal homolog 1 (Drosophila)	0	0.46	0.22	0.21	0	0	0.19	0.15	NM_032492	0	0.12	0	0.47	0	0.2	0.4	0.57	NM_026365
JAK1	Janus kinase 1	0.69	0	0	0.21	0.21	0.69	0	0.75	NM_002227	2.62	0	0.4	0.93	1.14	0.49	0.67	2.13	NM_146145
JAM3	Junction adhesion molecule 3	0	0	0	0	0.21	0	0	0	NM_032801	5.05	4.41	0.8	0.47	0.46	0.29	0	3.12	AK089637
JARID1B	jumonji, AT rich interactive domain 1B	0	0	0.22	0.21	0.21	0.17	0.38	0.15	NM_006618	0	0	0	0	0	0	0	0	NM_152895
JARID1C	jumonji, AT rich interactive domain 1C (Rbp2 like)	0	0	0	0	0	0	0	0	NM_004187	0	0	0.13	0.23	0.11	0.1	0.67	0.14	NM_013668
JARID1D	jumonji, AT rich interactive domain 1D	0	0.23	0.22	0.21	0	0	0.38	0	NM_004653	0	0	0	0	0	0	0.13	0	NM_011419
JARID2	Jumonji, AT rich interactive domain 2	0	0	0	0	0	0	0	0	NM_004973	0.56	0	0	0	0.11	0.88	0.13	0	BC051010
JMJD1C	Jumonji domain containing 1C	0	0	0	0	0	0	0	0	NM_032776	0	0	0	0.23	0.34	0	0.13	0.28	XM_975833
JMJD2A	Jumonji domain containing 2A	0	0	0	0	0	0.17	0	0	NM_014663	0	0	0	0.23	0	0.2	0.54	0.28	AK145066
JMJD6	jumonji domain containing 6	0	0	0	0.21	0	0	0	0	NM_001081461	0	0.24	0	0.12	0.46	0	0.4	0.14	NM_033398
JMJD6	jumonji domain containing 6, transcript variant 2	0	0.23	0	0.21	0	0.35	0.57	0	NM_015167	0	0.24	0	0.12	0.46	0	0.4	0	NM_033398
JOSD1	Josephin domain containing 1	0	0.23	0	0	0	0	0	0.15	NM_014876	0	0	0	0.12	0.11	0.49	0.13	0	NM_028792
JOSD2	Josephin domain containing 2	0	0.69	0	0	0	0	0	0	NM_138334	0	0.6	0.4	0.23	0.23	0	0.4	0.14	NM_025368
JRKL	Jerky homolog-like	0	0	0	0	0	0	0	0	NM_003772	0	0	0	0	0.11	0	0.27	0	AK079877
JTB	jumping translocation breakpoint	1.61	0.69	0.44	1.05	0.41	1.21	0.19	0.9	NM_006694	0.75	2.62	1.59	1.05	1.37	0.1	1.08	0.71	NM_206924
JTV1	JTV1 gene	0	0.23	0	0.21	0.21	0.52	0	0	NM_006303	0	0.12	0	0	0.34	0.29	0.67	0	NM_146165
JUN	jun oncogene	2.52	0.46	1.97	1.89	4.34	0.69	1.9	1.51	NM_002228	0.93	0.12	0	0	0.46	0.1	0.4	0.43	NM_010591
JUNB	jun B proto-oncogene	4.13	0.46	0.66	1.68	4.34	1.04	5.51	10.4	NM_002229	1.87	0	0	4.54	1.6	1.08	2.55	6.38	NM_008416
KARS	lysyl-tRNA synthetase	2.07	1.15	1.97	0.42	2.06	0.87	1.14	0.45	NM_005548	0.56	0.12	0	0.35	0.57	0.2	0.27	0.71	NM_053092
KATNA1	katanin p60 (ATPase-containing) subunit A1	0	0	0	0	0	0	0	0	NM_007044	0.37	0	0.13	0.23	0	0.2	0.13	0.71	NM_011835
KBTBD11	kelch repeat and BTB (POZ) domain containing 11	0.69	0	0.44	0	0	0.17	0.19	0	NM_014867	0	0.24	0	0	0.11	0	0.13	0	BC080858
KBTBD2	kelch repeat and BTB (POZ) domain containing 2	0	0	0	0	0.41	0	0	0	NM_015483	0.19	0.24	0	0.35	0.34	0.39	0.67	0.28	NM_145958
KCMF1	potassium channel modulatory factor 1	0	0	0	0	0	0	0	0	NM_020122	0	0	0	0.23	0	0.59	0.4	0	NM_019715
KCNC2	Potassium voltage gated channel, Shaw-related subfamily, member 2	0	0	0	0	0	0	0	0	NM_139136	0	0	0	0	0	0	0.4	0	AW047325
KCNE1	potassium voltage-gated channel, Isk-related subfamily, member 1	0	0	0	0	0	0	0	0	NM_000219	1.5	0	0	0	0	0.49	3.09	0.28	NM_008424
KCNH6	potassium voltage-gated channel, subfamily H (eag-related), member 6, transcript variant 1	3.9	6.43	3.06	8.63	0.83	2.42	8.74	5.12	NM_030779	0	0	0	0	0	0	0	0	NM_001037712
KCNJ16	potassium inwardly-rectifying channel, subfamily J, member 16	0	0.68	0.44	1.47	2.68	1.73	0.76	0	NM_018658	0.19	4.18	1.59	0.58	0.68	1.37	0.27	1.13	NM_010604
KCNK1	potassium channel, subfamily K, member 1	0	0	0.22	0.42	0	0.17	0	0	NM_002245	0	0	0.4	1.98	0.68	0.2	0.4	0.99	NM_008430
KCNK5	potassium channel, subfamily K, member 5	0.23	0.46	0.44	0	0	0	0.19	0	NM_003740	0	0.24	0	0.12	0	0	0	0	NM_021542
KCNQ1	potassium voltage-gated channel, subfamily Q, member 1	0.23	0	0.22	0.63	0	0.52	0.19	0.6	NM_000218	0.19	0	0	0	0.91	0.2	0.4	0.85	NM_008434
KCNV2	Potassium channel, subfamily V, member 2	0.46	0	0	0.21	0	0.17	0	0.3	BC045653	0	0	0	0	0	0	0	0	NM_183179
KCTD1	potassium channel tetramerisation domain containing 1	0	0.23	0.44	0.42	1.65	0.69	0.57	0.3	NM_198991	0	0	0	0	0.11	0.2	0	0	NM_134112
KCTD10	potassium channel tetramerisation domain containing 10	0.46	0	0.22	0	0	0.35	0.38	0.3	NM_031954	2.06	0	0	0.35	0.23	0.1	0.27	0	NM_026145
KCTD2	potassium channel tetramerisation domain containing 2	0	0	0	0	0.21	0	0	0.3	NM_015353	1.31	0.6	0.93	0.93	0.8	0.69	1.75	1.13	NM_183285
KCTD6	potassium channel tetramerisation domain containing 6	0	0	0.44	0	0	0	0.19	0	NM_153331	0.19	0.12	0.13	0.12	0.23	0	0.4	0	NM_027782
KDELC2	KDEL (Lys-Asp-Glu-Leu) containing 2	0.69	0	0	0	0.21	0.35	0	0	NM_153705	0	0	0	0	0	0	0	0	NM_212445
KDELR1	KDEL (Lys-Asp-Glu-Leu) endoplasmic reticulum protein retention receptor 1	0.23	1.15	0.44	0.63	0.21	0	0.57	0.45	NM_006801	0.37	0.72	0.4	1.28	2.16	0.98	2.42	1.13	NM_133950
KDR	kinase insert domain receptor (a type III receptor tyrosine kinase)	0.69	0	0	0	0	0	0	0	NM_002253	3.18	0	0	0	0	0	0	0	NM_010612
KHDRBS1	KH domain containing, RNA binding, signal transduction associated 1	0.46	0.46	0.44	0	0.21	0.17	0.57	0.75	NM_006559	0	0	0.13	0	0.11	0	0	0.14	NM_011317
KHDRBS3	KH domain containing, RNA binding, signal transduction associated 3	0	0.23	0	0.21	0.21	0.35	0.19	0	NM_006558	0	0	0	0.23	0.11	0	0	0	NM_010158
KHK	ketohexokinase	0	0.23	0.66	0	0	0	0	0.15	NM_000221	0.37	1.43	2.66	0	0	0.1	0.13	0	NM_008439
KHSRP	KH-type splicing regulatory protein (FUSE binding protein 2)	0.23	0.23	1.09	0	0.62	0.52	0	0.45	NM_003685	0	0	0.13	0	0.23	0	0.54	0.57	NM_010613
KHSRP	KH-type splicing regulatory protein	0.23	0.23	1.09	0	0.62	0.52	0	0.45	NM_003685	0	0	0.13	0	0.23	0	0.54	0.57	NM_010613
KIF12	kinesin family member 12	0	0.23	0.22	0.42	0.83	0	0.95	0.6	NM_138424	1.5	1.55	1.06	1.28	1.94	0.1	3.76	2.55	NM_010616
KIF13B	kinesin family member 13B	0	0	0.22	0	0.21	0.17	0.38	0.15	NM_015254	0	0	0	0.12	0	0	0.4	0	AK172989
KIF1B	kinesin family member 1B, transcript variant 2.	0	0	0	0	0	0	0	0	NM_015074	0.56	0.36	0.4	0.12	0.11	0	0	0	NM_207682
KIF1C	kinesin family member 1C	0.23	0.46	0	0.63	0.21	0.35	0	0.3	NM_006612	0	0	0	0	0	0	0	0	NM_153103
KIF22	kinesin family member 22	0.23	0.23	0.22	0.63	0.41	0	0.38	0.3	NM_007317	0	0	0	0	0	0	0.13	0	NM_145588
KIF26A	kinesin family member 26A	0	0	0	0.21	0	0	0.38	0.15	NM_015656	0	0	0	0.12	0	0	0	0	NM_001097621
KIF3B	kinesin family member 3B	0	0	0.66	0	0.21	0.69	0.19	0.3	NM_004798	0	0	0	0	0	0	0	0	NM_008444
KIFAP3	kinesin-associated protein 3	0.92	0	0.22	0.21	0	0.35	0.38	0.3	NM_014970	0	0	0	0.12	0	0	0.13	0.28	NM_010629
KIFC1	kinesin family member C1	0	0	0	0.21	0	0.35	0.38	0.15	NM_002263	0	0	0	0	0	0	0	0	NM_053173
KIFC3	kinesin family member C3	0	0	0	0.63	0.83	0	0.38	0.15	NM_005550	0	0	0.13	0.47	0.34	0.59	1.21	0.85	NM_010631
KIT	Kit oncogene	0	0	0	0.21	0	0	0.19	0	NM_000222	1.5	0	0	0	0	1.18	6.99	2.84	BC026713
KL	klotho	0	0	0.66	0	0	0.52	0	0	NM_004795	0.37	0.95	0.27	0.23	0.46	0.29	0.4	0.28	NM_013823
KLC1	kinesin light chain 1, transcript variant 1	0.46	0	0	0	0	0	0	0	NM_005552	0	0	0	0.12	0.23	0	0.27	0	NM_008450
KLC4	kinesin light chain 4	0	0.46	0.22	0.42	0.21	0	0	0.15	NM_201521	0	0.36	0.4	0.23	0.11	0.2	0	0.57	NM_029091
KLF10	Kruppel-like factor 10	0	0	0.44	0.82	0	0.354	2.85	1.66	NM_005655	0.19	0	0	0.12	0.11	0	0.54	0.28	NM_013692
KLF13	Kruppel-like factor 13	0	0	0.44	0	0.21	0.35	0.57	0.15	NM_015995	0.37	0	0.53	0.35	0.23	0	0.13	0	NM_023184
KLF17	Kruppel-like factor 17	0.23	0	0	0.21	0.41	0.35	0.19	0.3	NM_173484	0	0	0	0	0	0	0	0	NM_029416
KLF6	Kruppel-like factor 6	0.92	0.23	0.44	0.84	0.62	0	3.42	2.11	NM_001300	0	0.12	0	0.12	0	0.1	0.4	0.14	NM_011803
KLF6	Kruppel-like factor 6, transcript variant 2	0.92	0.23	0.44	0.84	0.62	0	3.42	2.11	NM_001300	0	0.12	0	0	0	0.1	0.4	0.14	NM_011803
KLF7	Kruppel-like factor 7 (ubiquitous)	0.69	0	0	0	0.21	0.17	0	0	BX537890	0	0	0	0.12	0	0	0	0	NM_033563
KLF9	Kruppel-like factor 9	0.23	0.46	0.44	0	0	0	0.38	0	NM_001206	0	0	0	0	0	0	0	0	NM_010638
KLHDC2	kelch domain containing 2	1.61	1.15	1.53	0.21	1.24	0.69	0.38	0.45	NM_014315	0	0	0.4	0.12	0	0	0	0	NM_027117
KLHDC4	kelch domain containing 4	0	0.23	0	0.21	1.03	0.17	0.19	0.15	NM_017566	0.56	0	0.13	0	0.23	0	0.13	0.14	NM_145695
KLHDC7A	kelch domain containing 7A	0	0	0.22	0	0	0	0.19	0.15	NM_152375	0	0.12	0.13	0.12	0.23	0.78	0.54	0.28	NM_173427
KLHDC8B	kelch domain containing 8B	0.23	0	0.44	0	0	0.17	0.38	0.3	NM_173546	0.37	0	0	0	0	0.1	0	0	NM_030075
KLHL12	kelch-like 12 (Drosophila)	0.23	0	0	0	0	0	0	0	NM_021633	0	0	0	0	0	0	0.13	0.14	NM_153128
KLHL17	kelch-like 17 (Drosophila)	0.46	0.46	0	0	0.21	0.17	0	0	NM_198317	0	0	0	0	0	0	0.13	0.28	NM_198305
KLHL21	kelch-like 21 (Drosophila)	0.46	0	0	0.84	0.21	0.35	0	0	NM_014851	0.56	0.24	0	0	0	0	0	0.85	NM_001033352
KLHL3	Kelch-like 3	0	0	0	0.21	0	1.04	0	0	NM_017415	0	0	0	0	0	0.49	0.13	0.14	AK033046
KLHL9	kelch-like 9 (Drosophila)	0.69	0	0	0	0	0	0.19	0	NM_018847	0.19	0.36	0.27	0.35	0.11	0.1	0.13	0.43	NM_172871
KLK4	kallikrein-related peptidase 4	0.46	0	0	0	0	0	0	0.15	NM_004917	0	0	0	0	0	0	0	0	NM_019928
KNG1	kininogen 1	0.46	4.83	0	40.39	40.05	46.03	0.38	0.3	NM_000893	0	0	3.19	3.14	5.24	4.7	0.27	0.43	NM_023125
KPNA2	karyopherin (importin) alpha 2	0	0.23	0.22	0	0.21	0.17	0.19	0.15	NM_002266	0	0.12	0	0.23	0.57	2.94	0.94	0.14	NM_010655
KPNA4	karyopherin alpha 4 (importin alpha 3)	0	0.46	0.22	0.63	0.21	0.17	0.19	0.15	NM_002268	0	0.36	0.13	0.35	0.11	0.2	0.13	0.28	NM_008467
KPNB1	karyopherin (importin) beta 1	0	0.46	0.66	0.21	0	0.52	0.76	0.45	NM_002265	0.56	0	0	0	0	0.1	0	0	NM_008379
KPTN	kaptin	0	0	0	0.21	0	0	0	0	NM_007059	0	0	0.13	0.35	0	0	0.27	0.85	NM_133727
KREMEN1	kringle containing transmembrane protein 1	0	0	0	0	0.21	0	0	0	NM_001039571	3.36	0	0	0.23	0.23	0.39	0.13	0.43	NM_032396
KRI1	KRI1 homolog (S. cerevisiae)	0	0	0	0	0	0	0	0	NM_023008	0	0.24	0.4	0.23	0.11	0	0.13	0.14	NM_145416
KRT18	keratin 18	0	0	0	0	0	0	0.57	0.6	CR616919	0	0	0	0	0.23	0.59	7.66	2.41	NM_010664
KRT7	keratin 7	0	0	0	0	0	0	0.19	0	NM_005556	2.43	0	0	4.07	7.52	5.48	25.94	7.23	NM_033073
KRT8	keratin 8	0	2.3	3.06	1.47	2.27	2.25	6.27	16.57	NM_002273	0.75	2.39	2.39	2.33	2.05	2.15	9.68	3.69	NM_031170
KRTCAP2	keratinocyte associated protein 2	0.69	0.92	1.09	0.21	0.41	0.52	0.76	0.45	NM_173852	0	0.84	1.06	1.51	0.68	0.2	0.54	0.85	NM_025327
KTN1	kinectin 1	1.38	0.46	1.09	0.42	1.03	0.52	0.95	0.9	NM_182926	1.31	0	0	0	0.11	0.39	0.13	0	NM_008477
L1CAM	L1 cell adhesion molecule	0	0	0	0	0	0	0	0.3	NM_000425	0	0	0	0.58	0.11	0.1	0.67	0.85	NM_008478
L1TD1	LINE-1 type transposase domain containing 1	0	0.23	1.09	0.21	0	0.52	0	0	NM_019079	0	0	0	0	0	0	0	0	NM_001081202
L3MBTL2	l(3)mbt-like 2 (Drosophila)	0.23	0	0	0	0	0	0.19	0	NM_031488	0	0.12	0.4	0	0	0	0	0	NM_145993
LACTB	lactamase, beta, nuclear gene encoding mitochondrial protein	0	0.46	0	0	0	0.17	0.19	0	NM_032857	0.19	0.24	0.27	0	0	1.08	0.27	0.14	NM_030717
LACTB2	lactamase, beta 2	0	0	0.66	0	0.21	0	0.19	0	NM_016027	0.19	2.15	0.93	0	0	0.1	0	0	NM_145381
LAMA5	laminin, alpha 5	0.69	0	0.22	0.42	0.41	0.17	0.38	0.75	NM_005560	0.93	0.6	0	0.47	0.34	0.49	1.34	0.57	NM_001081171
LAMB1	laminin, beta 1	0.23	0	0.22	0.42	0.21	0.17	0.95	0.15	NM_002291	0	0.12	0	0.23	0.23	0.39	0.13	0.71	NM_008482
LAMB2	laminin, beta 2 (laminin S)	2.75	1.61	0.22	0.42	0.21	0.69	0.19	0.9	NM_002292	1.68	0	0.27	0.47	0.91	2.35	1.75	0.71	NM_008483
LAMC1	laminin, gamma 1	0	0	0	0	0	0.17	0.19	0	NM_002293	0	0	0.13	0.12	0.11	0	0.27	0.28	NM_010683
LAMC2	laminin, gamma 2	0	0.23	0.22	0.42	0	0	0	0.6	NM_005562	0	0	0	0.12	0.57	0.59	2.42	0.57	NM_008485
LAMP1	lysosomal-associated membrane protein 1	2.52	4.37	3.06	1.05	1.86	1.38	1.33	1.81	NM_005561	2.99	1.91	2.92	2.56	1.94	1.66	2.15	6.1	NM_010684
LAMP2	lysosomal-associated membrane protein 2, transcript variant 1	0.69	0.69	0.22	0	0.21	0	0.19	0.3	NM_002294	1.12	8.11	6.24	1.28	0.8	0.98	0.13	0.85	NM_001017959
LANCL1	LanC lantibiotic synthetase component C-like 1 (bacterial)	0.23	0.46	0	0	0.21	0	0	0	NM_006055	0	0	0	0	0	0	0	0	NM_921295
LANCL2	LanC lantibiotic synthetase component C-like 2 (bacterial)	0	0	0	0	0	0	0.38	0	NM_018697	0	0	0	0	0	0	0	0	NM_133737
[truncated: 2,646 more rows]
