# Supplementary material for: Of Mice and Men: Divergence of Gene Expression Patterns in Kidney
Source: PLoS One. 2012 Oct 3;7(10):e46876. doi: 10.1371/journal.pone.0046876 (PMC3463552; doi:10.1371/journal.pone.0046876)
Supplement: Table S3 — Subgroups of genes from HMKS database. Genes were selected from HMKS database on basis of their belonging to IPA functional clusters (Apoptosis, protein metabolism, kidney and, transport of cations) or of a Pearson’s coefficient >0.7. Genes are listed according to their HUGO nomenclature. (XLSX) [file pone.0046876.s005.xlsx]

## Sheet: Feuil1
Table S3. Subgroups of genes from HMKS database
Apoptosis	Protein metabolism	Kidney	Transport of cations	Pearson's coef >0.7
AGPAT2	DHCR24	FLNC	CYTB	ACADM
DECR1	ACO1	IL1B	ATP1B1	ACE2
DHCR24	ADAM17	LOX	ATP1A1	ACO2
AKAP1	APC	PTGS2	MIF	ACOX1
AIM2	ADRM1	HIPK2	FXYD2	ACOX2
ACTN4	ADRBK1	OTUD1	KNG1	ACP6
ATF2	ADM	APLN	APP	ACSL1
ATF3	ANPEP	SERPINC1	SLC12A1	ACTG1
ACVR1	ACY1	HRH4	ATP6V0C	ACTN4
ACVR1B	APP	ANTXR1	SLC12A3	ACY1
ADNP	ANAPC4	PDGFRB	EGF	AHCY
APPL1	ANAPC5	DOCK10	ATP5B	AHNAK
APC	ACE2	ADAM17	ATP6V1F	AIM1
ARF6	AGT	MED14	ATP6V0B	AK3L1
ADRBK1	APH1A	GMNN	VDAC1	AKAP8
ADM	RNPEP	GNG2	SCNN1A	ALDH1A1
AHSA1	ARIH2	IFNAR2	ATP6AP1	ALDH3A2
AKT1S1	ATG7	TNFRSF19	ATP6V1B1	ALDH4A1
ANPEP	ABCF1	PAK2	ATP5D	ALDH6A1
AARS	AURKAIP1	TIMM17B	ATOX1	ALDH8A1
ALB	AMFR	PDGFRA	PDZK1	ALDH9A1
ALDH1A1	BCL3	CXCL1	SLC44A2	ALDOB
ALDH2	BAG1	PDE7B	FKBP4	ALG5
ALDOA	BAG2	PPP1R12C	TRPV4	AMN
ALDOC	BLMH	MPP2	SLC22A2	ANKIB1
ATRX	BMP2	EXOC5	ATP6V0A4	ANPEP
A2M	CDH1	NR3C2	SLC4A4	ANTXR2
AES	CAPN1	PNN	SCNN1G	ANXA1
APP	CAPN2	WASF3	KIT	ANXA11
APBB1	CAPNS1	SETD1B	ANXA6	ANXA2
AGT	CALR	PKN2	ATP6V1B2	AQP1
ANXA1	CPE	PIK3CA	SCNN1B	AQP2
ANXA7	CBLB	C1GALT1	VPS4B	AQP3
APH1A	CASP3	NTRK1	CCS	AQP6
AIFM2	CARD11	PTCH1	SCN4B	ARAF
AQP7	CTSC	ITGA2	ATP1B3	ARHGAP28
ARG2	CTSD	PDE4B	SLC36A2	ARL6IP5
ARMC10	CTSF	DDX23	ATP6V1E1	ARNT2
ARNT2	CTSZ	GPT2	VDR	ASS1
ATXN2	CAV1	GREM1	GJA4	ATOX1
ATG7	CEBPB	PDE7A	ANXA1	ATP1A1
ATP6AP2	CD81	NUP98	KCNK1	ATP1B1
ATP1A1	CLN6	RRM2	SLC40A1	ATP6V0D1
ABCG2	CHFR	ABCA1	KCNE1	ATP8B2
ATN1	CCKAR	SLIT2	SLC39A5	ATPAF2
ATG12	COPS5	NPHP3	NSF	BANP
ATG5	CUL2	CASP3	KCNQ1	BAT2
BIRC2	CUL3	RXRA	BAX	BAZ2B
BBS2	CCND1	MAPK14	SLC13A1	BCAM
BCL3	CDKN1B	PDE3B	SLC25A29	BCKDHA
BLNK	DHPS	EDN1	TRPM4	BCKDHB
BTG1	DERL1	SLU7	SLC22A1	BCL2L12
BNIPL	DPP3	FREM1	TRPM7	BCOR
BNIP3	DPP7	MMP14	CXCL12	BDH2
BNIP3	DLG1	TPP2	TCIRG1	BGN
BNIP1	DNAJC1	IL2	SFXN1	BHMT2
BAK1	DCTN2	PLAUR	DLG1	BICC1
BAG1	EGLN2	MAML2	NR3C1	BLCAP
BAG3	EDN1	GHR	PSEN1	BLNK
BAX	ECE1	CTCF	SLC44A1	BRWD2
BIK	EGF	CCAR1	PPP3CA	CALB1
BCL2L1	EGFR	LAMC1	P2RX4	CALB1
BCL2L12	ERRFI1	ABCC3	CAV1	CARS2
BCL2L13	EEF1A1	EMP3	PLCB3	CCDC84
BCL2L2	EIF1	STAB1	SLC9A2	CDC42EP1
BOK	EIF1B	XYLT2	FAF1	CDH16
BAD	EIF2AK1	PSEN2	SLC9A1	CDKN1C
BECN1	EIF2AK3	NUP214	SLC22A4	CES2
ST6GAL1	EIF2AK4	HYOU1	SLC11A2	CHMP2B
BTC	EIF2A	PPID	PKD1	CIDEB
BID	EIF2B2	PARP1	CHRNA4	CKB
BGN	EIF2B3	SPRY1	SLC30A2	CLCNKA
BLVRA	EIF2B4	HARS	PTEN	CLDN1
BMI1	EIF2B5	CDK5	SLC4A11	CLDN2
BMP2	EIF2C1	PTP4A1	STIM1	CLDN3
BEX2	EIF3B	CTNNBIP1	ITPR2	CLDN5
BAP1	EIF3D	HDAC2	ATP6V1C1	CLIC4
BCAR1	EIF3E	BID	SLC22A5	CLIC5
BTG2	EIF3F	PYCARD	CSK	CLSTN1
CDH1	EIF3H	STC1	NPY	CLYBL
CALB1	EIF3I	TLR3	ATP2A2	CMTM8
CABIN1	EIF3J	GSK3B	ITPR1	CNDP2
CIB1	EIF4G3	SMO	AGT	COG7
CAPN1	EIF4A2	HDAC3	SLC39A14	COL4A4
CAPNS1	EIF4A3	PKHD1	KCNK5	COMMD6
CALR	EIF4A1	PSMD12	IL8	COPS7A
CREBL2	EIF4B	SDC2	CDKN1B	COX4I1
CAPRIN2	EIF4E	CDKN1B	SLC38A3	COX7C
CEACAM5	EIF4EBP1	IL8	SLC30A5	CRY1
CTF1	EIF4EBP2	PRKCH	SLC31A2	CRYAB
CBLB	EIF4H	FYN	PSEN2	CRYM
CSNK1A1	EIF5A	CLOCK	SLC39A3	CSRP1
CSNK1E	XPO1	TGFBR1	ATP2B1	CSTB
CSNK2A2	FAF1	RDH10	NR3C2	CYBA
CASP3	FBXO2	LIN7C	PLCZ1	CYFIP2
CTNNB1	FBXO3	SMAD3	CXCL1	CYP27A1
CTNNBL1	FBXO7	SEMA3F	PANX1	DAB2
CTSD	FLNA	AGT	ATP12A	DCAKD
CAV1	FZR1	CXCL3	IL1B	DCTN6
CITED2	FMR1	IL8RA	CATSPER4	DDB1
CEBPB	GSPT1	RDH16		DDC
CTCF	GJA1	AGPAT2		DDN
CD14	GATA3	HBEGF		DEFB1
CD2AP	GSN	HDAC8		DHX30
CD36	GLMN	CDK7		DHX8
CD79B	GSK3A	UBE2B		DKK3
CDK2AP1	GSK3B	ITPR1		DMGDH
CIDEB	GADD45G	BIRC2		DNAJC12
CCAR1	GHR	BAK1		DPEP1
CX3CL1	GNAQ	TCF12		DYSF
CXCL1	H2AFZ	CSNK1E		EDG1
CXCL12	HSPB1	PRNP		EEF1A1
CXCL2	HRSP12	SPEN		EFNB1
CLIC4	HGS	PTPRJ		EHBP1L1
CHKA	HEXB	AMDHD2		EHD3
CHMP5	HDAC2	EPS15		EHHADH
CHD8	HDAC6	PHF2		EIF3H
CLU	HERPUD1	PPM1A		EIF6
MERTK	INPPL1	NDFIP1		ELF3
CCDC6	IDE	NRAS		EMCN
CSDA	IRS1	RBM5		ENG
CSF1R	IGFBP5	PYGO2		EPN3
CTGF	ITGA2	APBB1		EPN3
CHUK	ITGB1	NRGN		EPS8L2
COPS5	IRF1	TRIM8		ERICH1
CREBBP	IFIT1	EGFR		ESPN
CRTC2	IL1B	F2RL1		ETFB
CRYAB	IL12B	NFKB1		ETHE1
CSK	IL18	TNFAIP3		EXOC3
CTBP1	IL2	DIRC2		F2RL3
CLEC11A	IFT52	PTEN		FBXL14
CUL1	IREB2	IL13RA1		FBXL20
CUL2	ITCH	ADRBK1		FBXW4
CUL3	JUNB	TMEM132A		FGF18
CCND1	JUN	CHKA		FLNB
CCND3	KLK4	PLXNA1		FMO1
CCNI	KRT7	POU3F3		FNDC3B
CCNL2	KHDRBS1	TOP2B		FOXN2
CCNT1	KNG1	TMEM63A		FSCN1
CDK5	LGMN	IGF1R		FSTL1
CDK9	LRSAM1	BICC1		FTCD
CDKN1B	LONP1	CHRNA4		FXYD4
CDKN1C	LAMP2	TICAM1		GCGR
CTH	MAN1B1	PTPN14		GCHFR
CSTA	MKNK1	SFXN3		GDF15
CST3	MMP14	VAV2		GLYAT
CYR61	MMP24	HDAC1		GNPDA1
CYBA	MBTPS1	UBE2H		GPD1
CYFIP2	MGEA5	F2RL3		GPR125
DPF2	MVK	BSND		GPX3
DDB2	MRPL12	GNE		GRHPR
DDX3X	MRPL16	SNRPA1		GSS
DDX41	MRPL20	PKD1		GSS
DDX5	MRPL23	HMGCR		GSTT1
DAPK1	MRPL27	MAPK8		GTPBP1
DOCK1	MRPL3	GJA1		H1F0
DEFB1	MRPL32	IFNGR1		HAAO
DLL1	MRPL34	NPR1		HADH
DDN	MRPL41	CANT1		HGD
DEPDC6	MRPL51	JMJD6		HMG20A
DKK3	RNR2	L1CAM		HMGB3
DAB2IP	MAPK3	NUP62		HMGCL
DAB2	MAP2K3	AGXT		HMGCS2
DNMT1	MAP3K7	PTDSS1		HOXB6
DDIT3	MAPK1	TKT		HOXB9
DDIT4	MAPK15	NEDD4		HPD
DNAJB1	MYH9	CHMP5		HPN
DNAJC15	MTPN	SGPL1		HRSP12
DNAJC5	NDUFA13	NUP153		HS6ST1
DUSP1	NAPSA	PTK2B		HSPA5
DUSP2	NACA	TFDP1		HSPG2
DUSP22	NDFIP1	RRM2B		HTRA1
DNM2	NEDD4	NFKB2		ID4
DYNLL1	NPY	CAV1		IGBP1
DAG1	NCSTN	COMMD5		IGFBP5
EGR1	NCK2	TUBB3		IGFBP7
EMILIN2	NXT1	RBM17		IL6ST
EAF2	NFKB1	RRAS		ILK
EMD	NR3C1	JAG1		INSRR
ENDOG	NXF1	APC		ITGA3
EDN1	NFX1	TIMP2		ITGAV
ECE1	NCL	PTGER3		JAK1
ENO1	NPM1	CSF1R		JUNB
EFNB1	PGA5	PPP3CA		KDR
EGF	PMPCA	MET		KHK
EGFR	PEPD	PRMT5		KIF12
EPHX1	PET112L	ABCG2		KLF10
EBAG9	PIGQ	PPARD		KLF6
ETHE1	PITRM1	SUMO1		KLF6
ETV6	PLG	SORL1		KLHL3
EIF2AK1	PLAU	ERCC1		KNG1
EIF2AK3	PHLDA1	MRPS12		KPNA4
EIF2AK4	PABPC4	EFNB1		KRT18
EIF3H	PAIP2	PSEN1		KRT7
EIF4E	PSEN1	IRS1		LDHD
EIF4EBP1	PSEN2	SNW1		LIMS2
EIF5A	PSENEN	THY1		LIN9
EWSR1	PCOLCE	KHDRBS1		LITAF
ERCC1	PDCD4	PAX8		LMNA
ERCC3	PRSS12	NR3C1		LRP1
ERCC5	PSMC2	TMEM49		LRRC8A
EXOC2	PSMC4	DLG1		LYZ
NME1	PSMD14	TUBG1		MAFB
FANCA	PSMB3	FRAS1		MAGEF1
FNTA	PSMB5	ODC1		MAL
FAF1	PRKCQ	MED19		MAL2
FASTK	PRKRA	DAPK1		MAP2K1
FOSB	PPP1CA	MST1		MAPT
FBXW7	PTK2B	BNIP3		MATR3
FEM1B	RAD23A	RB1		MBP
FDXR	RAPGEF3	NAPRT1		MCCC1
FTH1	RGS2	PPP3R1		MCCC2
FBL	ARHGEF2	KPNB1		MED19
FAU	RPL11	TGFBR3		MED30
FIP1L1	RPL14	CALCOCO1		MGEA5
FKBP1A	RPL15	HDAC6		MGP
FKBP8	RPL17	LDLR		MIOX
FSTL1	RPL18	ARHGAP1		MLXIPL
FOXO4	RPL18A	KDR		MMD
FOXP1	RPL19	VAMP2		MMP15
FUS	RPL21	FDFT1		MMS19L
FYN	RPL22	MMP24		MOBKL1B
GSPT1	RPL23A	AKT1		MOGAT1
GJA1	RPL24	TRIM27		MPP5
GSN	RPL26	HK1		MTMR11
GNE	RPL28	CDK9		MYO7A
GPI	RPL29	MYO1E		MYO7B
GLUD1	RPL29	PTTG1		NAT14
GCLC	RPL30	NFAT5		NDUFA2
QARS	RPL34	ADAMTS1		NDUFA4L2
GLRX	RPL35	CALB1		NES
GSTM5	RPL39	DNM2		NFKBIL2
GAPDH	RPL4	ABL1		NIT1
GSK3A	RPL41	CXCL12		NOLC1
GSK3B	RPL5	PSMA1		NPHS2
GLO1	RPL6	ULK1		NPR1
GRN	RPL7	RBM7		NPTN
GREM1	RPL7A	ADNP		NR1H3
GADD45G	RPL8	MID1IP1		NRGN
GADD45A	RPL9	SLC22A1		NTRK1
GADD45B	RPS11	TNFRSF1A		NUDT15
GAS6	RPS17	RNF10		NUDT16L1
GAS1	RPS19	APH1A		NUP54
GDF15	RPS2	ITGA3		NUPR1
GDF5	RPS27	PSMC4		PAFAH2
GAB1	RPS3	SNRPC		PAH
GHR	RPS3A	IRF3		PAPPA
GNB2	RPS4X	KL		PARN
GNB2L1	RPS5	ALDH3A2		PARVA
GNG2	RPS6KA1	ARID1A		PBEF1
GNAQ	RPS9	PMM1		PDE7B
GNB1	RNF6	TRIM44		PDGFRB
GNL3	RNF11	EFNB2		PDIA4
GUCA2B	RNF128	CX3CL1		PDZK1
GULP1	RNF40	SLC2A1		PEPD
HES1	RBX1	SMTN		PGAM2
HEYL	RBM3	BAX		PHF17
HSPB1	SQSTM1	UBE2L3		PIGK
HSPA5	SRGN	TIMP1		PIPOX
HSPA8	STAT5A	BOK		PITPNA
HSP90AA1	SSB	POLR2J		PITPNM1
HSP90AB1	SKI	OSGIN1		PKM2
HSF1	SMURF2	APRT		PLAUR
HSF2	SGSM3	ERCC5		PLCG2
HBEGF	SUMO1	DDN		PLEKHF2
HBXIP	SLC12A1	EIF2B5		PLEKHO1
HPN	SPG7	SFRS6		PLXNB2
HK1	STUB1	XRCC6		PMPCA
HMGB1	SOD2	CFI		PODXL
HMGB1	ST14	THBS1		POLR2G
HDAC1	SOCS3	BAD		PPIL4
HDAC2	THBS1	MAPK1		PPP1R1A
HDAC3	THY1	LMAN2		PPP5C
HTATIP2	AKT1	FPGS		PPP6C
BAT3	TIMP2	MYH9		PRKAR2A
HOXB9	TIMP3	SORT1		PRKCDBP
HIPK1	TLR3	MAP2K3		PRKCDBP
HIPK2	TICAM1	WFS1		PRMT3
HERPUD1	SP1	TUBE1		PRODH2
HSD11B2	TPP1	SPG7		PRSS22
HSD17B10	TPP2	NCKAP1		PSEN1
HYOU1	TSFM	PAFAH1B1		PSMB4
IER3	TUFM	RAF1		PSMD13
IHH	TNFSF10	ARSB		PTGER1
ID1	TSG101	SF3B2		PTP4A1
ID2	UBB	TCF21		PTRF
ING1	UBC	DAK		RAB28
ING3	UCHL1	BGN		RAB3A
ING4	UFD1L	STMN1		RAD21
IKBKB	USP11	GLIS2		RAG1AP1
IMMT	USP3	MANBA		RAMP3
ITPR1	UBE4A	PIGR		RARS
ITPR2	UBE2B	NXF1		RASAL1
INPPL1	UBE2D1	CCND1		RCHY1
IRS1	UBE2E1	HMGB1		RETSAT
IRS2	UBE2G2	ADM		RPIA
IGF2R	UBE2H	IDH1		RPL7A
IGFBP4	UBE2L3	PRPF6		RRAS
IGFBP5	VCP	COL4A4		RUSC2
IGFBP7	FOS	GAK		RXRB
IGF1R	REL	MAP2K1		SAT2
ITM2B	XPNPEP1	GAB1		SCD1
INTS1	YBX2	FOXC1		SCNN1B
ITGB5	ZFP36L1	CCNI		SCNN1G
ILK	ZMPSTE24	BCAR1		SCOTIN
ITGA2		RALB		SEMA3F
ITGAV		AMN		SEMA4B
ITGB1		POLR2A		SEMA5A
IFNAR2		VDR		SEPHS2
IFNGR1		IRF1		SEPT11
IRF1		TNS1		SERINC1
IRF3		ACAT1		SERPINF2
IL1RL1		SF3B1		SETDB1
IL1B		EMP1		SFRS1
IL12B		HNRPDL		SIGIRR
IL18		CGREF1		SIPA1L1
IL2		HSPA5		SLC12A1
IL6ST		IMPDH2		SLC12A3
IL8		CDKN1C		SLC13A1
IRAK1		BECN1		SLC13A2
IQGAP2		TUBA4A		SLC13A3
ICMT		NARS		SLC16A4
JAG1		DLST		SLC16A9
JAK1		SOD2		SLC22A7
JMJD6		ARHGDIA		SLC23A1
JUN		IL18		SLC23A3
KRT18		SMAD4		SLC25A29
KRT8		DHX15		SLC25A29
KDR		TFRC		SLC25A35
KIFAP3		XAB2		SLC25A5
KNG1		HSPG2		SLC27A2
KIT		MOAP1		SLC2A2
KL		SLC5A2		SLC34A1
KLF10		TUBA1C		SLC39A5
KLF13		ZYX		SLC3A1
KLF6		CD2AP		SLC4A11
KLF7		SUB1		SLC4A4
LDHA		PSMA2		SLC4A9
LAMA5		STUB1		SLC6A13
LAMB2		SCHIP1		SLC6A18
LATS2		CES2		SLC6A18
LGALS2		CLPTM1		SLC7A13
LGALS3BP		LAMA5		SLC7A7
LCMT1		RAPGEF3		SLC7A9
LZTS2		PTGS1		SLCO2A1
LDLR		HMGCS1		SLCO4A1
LRPAP1		PSMD6		SMARCC2
LRP1		CDK2AP1		SMARCE1
LTBR		RUFY1		SOD1
MAEA		PDE4C		SOSTDC1
MIF		MCL1		ST6GALNAC6
SMAD6		NFE2L2		STAB1
MDH1		OSBPL3		STARD10
MGP		ITGB1		STARD13
MAX		AFG3L2		STCH
MED1		BCL2L1		STMN1
MED29		PXN		STOX2
MAGEH1		CTNNB1		SUCLG2
MAGED1		POR		SURF6
MBTPS1		CSDA		SUSD2
MNAT1		GSTZ1		SUZ12
MET		SMARCB1		TACSTD1
MTA2		SARS		TACSTD2
MITF		COASY		TAF15
MAPT		MEP1A		TBC1D24
MIB1		GIPC1		TBKBP1
MRPS30		KLF6		TBX2
MFN2		TENC1		TBX2
MAPK14		RASSF4		TCF1
MAPK3		NUPR1		TCF21
MAPK7		AFF1		TCN2
MAP2K3		POLR2C		TEK
MAP3K1		TUBB2A		TENC1
MAP3K10		PTGER1		TFPI
MAP3K11		AVPR2		TGIF1
MAP3K7		NPNT		TIMM17B
MAPK1		PYCRL		TIMP2
MAPK8		GAS6		TLE2
MAPKAP1		ATXN2		TLOC1
MAP2K1		GRN		TM4SF1
MAP2K2		PSMB5		TM7SF3
MAP3K7IP2		DCTN2		TMEFF1
MOAP1		LMNA		TMEM106C
MAOA		POLR2I		TMEM112B
MALT1		CLU		TMEM174
MSH2		KRT18		TMEM176A
MAL		CLCNKA		TMEM27
MCL1		DAZAP2		TMEM49
MEF2A		PSMA7		TMEM58
MYO6		DDIT3		TMEM82
MTPN		PKP3		TMTC1
GNPTG		PSMA5		TNC
ASAH1		OSR1		TPP1
NQO1		KARS		TPP2
NQO2		KIT		TRAP1
NDUFA13		PRPF8		TREH
NDUFS1		MAPT		TRIM40
NDUFS3		TUBB2C		TRIM44
NCKAP1		GADD45A		TSEN34
NDST1		SDHC		TSKU
NDN		CXCL2		TSPAN15
NDNL2		ATP6V0A4		TSPAN2
NELL1		TUBA1A		TSPAN8
NGFRAP1		GSN		TTC35
NAPA		NDEL1		TTF1
NEDD9		SLC22A2		TUBA1B
NRAS		TRPV4		TUBB2B
NRGN		LAMB2		UBA52
NTRK1		DAB2		UBE2S
NSMAF		CD164		VIM
NBN		PSMC5		VPS37A
NEK1		MAFB		WRB
MPG		DDB1		WWC1
NDRG1		GSTT1		XYLB
NME3		SNRPD3		YPEL2
NFE2L2		ILK		ZC3H11A
NFATC4		IL12B		ZDHHC17
NFKB1		PFKM		ZFP36
NFKB2		JUN		ZNHIT4
NFE2L1		GRHPR
NFIL3		ACTN4
NUPR1		TNFSF10
NCOA1		CCND3
NR1H2		PPP2R1A
NR1H3		PSMA3
NR3C1		YBX1
NOC2L		PTGES3
NCL		DUSP1
NPM1		PSMB6
NPM1		LPL
NUP62		RAD21
ODC1		CLTC
OSGIN1		ACOX1
PAK2		ATP6V1A
PAK4		BTG2
PAK6		CDH1
PALLD		ATF3
PPT1		RAC1
PARVA		CHUK
PXN		SOSTDC1
PPIA		HDAC11
PPID		MEP1B
PPIF		ATP6V1B1
PRDX2		FAH
PRDX3		RNH1
PRDX5		ITGAV
PEX11B		HSP90AA1
PPARD		GNB2
PHF17		SLC34A1
PTEN		PSMC3
PEBP1		HSPB1
PIK3CA		VDAC1
PIGT		ANXA2
PITPNA		UQCRFS1
PIK3IP1		PLAU
PLA2G6		CST3
PLCD3		CFB
PLCG2		TIMP3
PLSCR1		YWHAQ
PTTG1		PTGDS
PLAC8		AQP1
PLG		AES
PLAU		DNASE1
PLAUR		EGF
PAFAH1B3		PSAP
PAFAH1B2		CRYAB
PAFAH1B1		SLC12A3
PDGFRA		PPIA
PDGFRB		CTGF
PHLDA1		BCAM
PHLDA2		RPL10A
PHLDA3		DEFB1
PLAGL1		HSP90AB1
PLRG1		RPL12
PARP1		FOS
PKD1		HSD11B2
PQBP1		ATP6V0C
POLB		CLCNKB
POLH		RPL18
POLR2A		SLC12A1
PSEN1		IER3
PSEN2		APP
PSENEN		KNG1
PRNP		TXNIP
COL4A2		CDH16
PDCD2		NPHS2
PDCD4		FXYD2
PDCD5		MIF
PDCD6		ATP1A1
PCNA		AQP3
PRR13		PODXL
P4HB		ATP1B1
PSAP		CYS1
PTGDS		AQP2
PTGER1
PTGER4
PTGS1
PTGS2
PSMD6
PSMB1
PIN1
PRKCI
PRKCQ
PKN2
PRKACA
PRKRA
PPP1CC
PPP1R13B
PPM1A
PPM1F
PPP2CA
PPP2CB
PPP2R1A
PPP3CA
PPP3R1
PPP5C
PTPN1
PTPN13
PTPRF
PRKRIR
PTMA
PTMA
PRPF19
PINK1
PTK2B
P2RX4
PYCARD
PKM2
RABGGTB
RAD21
RAD23B
RALBP1
RORC
RASSF4
RASGRP1
RHEB
RHOB
RASD1
RAC1
RB1CC1
RIPK3
RRAS
RAGE
RPA1
RB1
RBBP4
RBBP6
RBBP6
RBL2
RAI14
RXRA
REV3L
ARHGDIA
ROCK1
RNASE1
RRM2B
RPS3
RPS3A
RPS6KA1
RNF5
RNF7
RYBP
RBM4B
RBM5
ROM1
S100A10
S100A6
S100A9
SCIN
SEMA3F
SRGN
SERINC3
SRPK1
STK11
STK24
SERPINC1
SFT2D2
SH3GLB1
SHARPIN
STAT1
STAT5A
SIRPA
SIRT1
SIRT7
SIVA1
SKI
SMAD3
SMAD4
SMO
SUMO1
SLC2A1
SLC2A3
SLC22A2
SLC25A4
SLC9A1
SORT1
SAT1
SMPD1
SMPD2
SGPL1
SGPP1
SYK
SFRS2
SOX4
ST8SIA1
ST8SIA4
STMN1
SRA1
STUB1
SSRP1
SUB1
SDHC
SOD1
SOD2
SOD3
SOCS3
SMARCB1
SMARCE1
SDC2
TAF10
TAF6
TAF9B
TAOK3
TFPT
TNC
TENC1
TEX261
TXNIP
TXNL1
THBS1
AKT1
AKTIP
THRA
TIAL1
TJP2
TIMP1
TIMP2
TIMP3
TM2D1
TRAF7
TRAP1
TLR3
TICAM1
TOPBP1
SP1
TCF12
TCF21
TFDP1
TTF1
TFRC
TGFBR1
TGFBR3
TMEM132A
TRIB2
TRIM27
TRIM28
TPP2
TNFSF10
TNFSF9
TNFRSF12A
TNFRSF14
TNFRSF19
TNFRSF1A
TNFAIP3
TNFAIP8
TPD52L1
TSG101
YWHAB
YWHAE
YWHAQ
UBR4
UBE2B
UBE2M
B4GALT1
B4GALT5
GALNT1
GALNT2
UNC5CL
ABL1
ABL2
VPS28
VCP
VEGFC
ERBB3
FOS
VDR
MAFB
VDAC1
VDAC2
RAF1
RALB
REL
WEE1
WNT2
WFS1
XBP1
XPC
XRCC5
XRCC6
YBX1
YES1
YAP1
ZFP36
ZFP36L2
ZFAND5
ZFYVE16
